# Supplementary material for: Differentially methylated regions (DMRs)-dependent cfDNA fragmentation profile for diagnosis of breast cancer
Source: Research Square preprint supplement (doi:10.21203/rs.3.rs-403375/v1), 2021-04-09
Supplement: Supplementary file 1 [file a2fd03dfebe711130630420a.xlsx]

## Sheet: Table S1
Table S1. Summary of patients and samples analyzed in this study.
Sample name	Gender	Age	Stage	Cancer type	Concentration(ng/ml)	cfDNA(ng) for library construction
H1	Female	50	NA	Healthy	5.0375	13.95
H2	Female	51	NA	Healthy	8.372	28.98
H3	Female	42	NA	Healthy	6.81778	21.24
H4	Female	25	NA	Healthy	6.52632	12.4
H5	Female	42	NA	Healthy	11.9474	22.7
H6	Female	42	NA	Healthy	9.6	19.2
H7	Female	57	NA	Healthy	20.25	24.3
H8	Female	56	NA	Healthy	8	15.2
H9	Female	51	NA	Healthy	6.84211	13
H10	Female	56	NA	Healthy	6.36842	12.1
H11	Female	55	NA	Healthy	9.26316	17.6
P1	Female	52	Post-treatment, D393	Breast	2.9	5.8
P2	Female	42	Post-treatment, D726	Breast	2.47826	5.7
P3	Female	54	Post-treatment, D289	Breast	2.85	5.7
P4	Female	48	Ⅰ	Breast	6.3619	10.02
P5	Female	68	Ⅰ	Breast	9.52	14.28
P6	Female	56	IIB	Breast	8.25263	11.76
P7	Female	56	IIA	Breast	11.1636	15.35
P8	Female	40	IA	Breast	7.2	12.42
P9	Female	55	IA	Breast	11.6	14.5
P10	Female	26	IA	Breast	6	8.1
P11	Female	44	IA	Breast	5.31765	6.78
P12	Female	71	IA	Breast	5.43158	7.74
P13	Female	46	IIB	Breast	6.48	9.72
P14	Female	57	IV	Breast	41.6	26

## Sheet: Table S2
Table S2. Sequenced reads, deduplicated cfDNA fragments in cfMeDIP-seq libraries for patients with breast cancer and healthy individuals.
Sample	library	# of raw reads	# of clean reads	# of properly aligned reads to human genome (hg19)	# of uniq aligned and deduplicated reads to human genome (hg19)	# of cfDNA fragments
H1	Input	30770922	10700282	10267660	8570540	3893858
	IP	87434518	83459676	78336246	55097636	23316081
H2	Input	49360304	18490736	17704220	14824998	6752494
	IP	80198520	76578522	71399036	51175262	21287958
H3	Input	35563346	10573218	9139300	7502184	3430997
	IP	103187958	99010850	92594614	63497670	27207821
H4	Input	37526492	1775346	1346882	1180554	539557
	IP	56204314	51655644	49411016	29618322	12659598
H5	Input	37690728	5403116	4574948	3946544	1800419
	IP	73449860	68486520	65116322	34754438	14772251
H6	Input	53372420	3870278	3057742	2677160	1224785
	IP	42924902	39766062	35336564	20132112	8478441
H7	Input	46929596	3495272	2753546	2400392	1097011
	IP	55542530	51178800	48845424	28049482	11744165
H8	Input	28654720	1716974	1342732	1169578	534113
	IP	43478238	40123524	33562604	17627474	7453636
H9	Input	39013460	2980816	2715494	2331860	1061437
	IP	72992790	63181428	60353084	29164048	12203330
H10	Input	16317780	4500616	3760312	3264040	1492539
	IP	72020650	63584522	52076988	30101448	12697623
H11	Input	17294712	4655336	4143256	3576618	1633898
	IP	85638520	74693160	67915556	47200870	20415036
P1	Input	25775242	22631180	19105320	15795228	7251008
	IP	109650340	106484372	102965304	71268046	31179102
P2	Input	36072860	34456308	31849396	23953568	11004271
	IP	37666470	36380324	35003302	25849848	11064762
P3	Input	15071906	13400718	11271710	9367470	4297572
	IP	109358936	106023942	102465142	72414100	31573196
P4	Input	8705746	7017414	6833256	5435046	2494889
	IP	34557496	33378262	31935570	23102114	9938280
P5	Input	16808532	15351360	14951510	11708326	5373818
	IP	68924328	66337860	63563714	44422658	18529249
P6	Input	12933212	11837772	11548464	9083244	4112808
	IP	68594880	66016448	63263026	43991852	18402833
P7	Input	17552094	16081098	15670158	12171834	5540654
	IP	76340944	73953172	70718586	49591642	21184696
P8	Input	17802568	15034910	14716170	11319340	5140953
	IP	104856638	101287402	97634986	66440382	28646784
P9	Input	14262186	12636544	12347616	9733666	4405088
	IP	71512586	67197916	64412920	46704832	19471679
P10	Input	12596284	8254086	8080156	6381476	2837427
	IP	66146376	61037488	58813818	39901520	16500959
P11	Input	6522044	5457454	5361226	4271846	1944751
	IP	65236850	62437842	60408370	41402672	17745115
P12	Input	17082042	15671784	15311472	11764596	5379918
	IP	32593472	31505208	30091346	22060392	9445438
P13	Input	11456278	9476184	9213838	7355616	3372190
	IP	78431968	75518368	72442890	50330338	21526106
P14	Input	13238182	12346690	11968534	9488242	4406535
	IP	69199560	67202178	63936826	46360566	19676909

## Sheet: Table S3
Table S3. Altered short cfDNA fragment ratio in patients with breast cancer.
Sample name	Average short cfDNA fragment ratio size in Input library	Average short cfDNA fragment ratio size in IP library	Average short cfDNA fragment ratio size in IP library within hypermethylated regions	Average short cfDNA fragment ratio size in IP library within hypomethylated regions	Correlation of fragment ratio profile to median fragment ration profile of healthy individuals	Detected using cut-offs = 0.72
H1	0.172244	0.117865	0.0939589	0.134438	N.A.	N.A.
H2	0.178183	0.128506	0.0994242	0.147662	N.A.	N.A.
H3	0.158192	0.10728	0.0967182	0.116738	N.A.	N.A.
H4	0.184859	0.114878	0.178562	0.223795	0.902891	N
H5	0.20088	0.145822	0.231774	0.289354	0.870727	N
H6	0.207962	0.144693	0.238959	0.255225	0.881811	N
H7	0.172495	0.109572	0.178678	0.207573	0.832273	N
H8	0.204119	0.149671	0.247928	0.248899	0.73499	N
H9	0.188029	0.148369	0.236066	0.285743	0.820317	N
H10	0.149965	0.165759	0.232525	0.278082	0.736593	N
H11	0.153994	0.158189	0.221296	0.242238	0.826798	N
P1	0.129837	0.129848	0.108938	0.179019	N.A.	N.A.
P2	0.155526	0.146148	0.121347	0.201739	N.A.	N.A.
P3	0.17012	0.151995	0.132173	0.197021	N.A.	N.A.
P4	0.147192	0.165296	0.18733	0.272485	0.583121	Y
P5	0.130917	0.15769	0.182002	0.27614	0.818965	Y
P6	0.106968	0.124262	0.145637	0.222893	0.76796	N
P7	0.0828763	0.0948551	0.108889	0.193203	0.760719	N
P8	0.0910828	0.103275	0.122956	0.218795	0.648442	Y
P9	0.10112	0.104688	0.118718	0.21427	0.678302	Y
P10	0.137528	0.147845	0.168328	0.283319	0.57009	Y
P11	0.0922085	0.111479	0.133304	0.210986	0.700906	Y
P12	0.120327	0.207049	0.220986	0.291955	0.598805	Y
P13	0.142571	0.144984	0.167178	0.252466	0.596932	Y
P14	0.337393	0.361049	0.386609	0.476357	0.790241	N

## Sheet: Table S4
Table S4. DMRs obtained from cfMeDIP-seq of patients with breast cancer and healthy individuals in discovery cohort.
Chr	start	stop	log2 fold change	padj	cfDNA fragment counts for case samples
					H1	H2	H3	P1	P2	P3
chr1	600001	610000	2.51631	0.000723557	6	1	6	18	21	35
chr1	4440001	4450000	1.10086	0.0017245	23	27	33	85	32	81
chr1	12790001	12800000	1.27655	0.0247219	8	11	17	46	15	36
chr1	12870001	12880000	1.39008	0.0220484	9	14	7	33	15	40
chr1	16880001	16890000	1.47536	0.00675338	8	12	12	40	15	45
chr1	34750001	34760000	1.00603	0.00752282	24	28	29	74	30	77
chr1	34820001	34830000	1.00025	0.00129682	33	33	47	98	44	106
chr1	35150001	35160000	1.05824	0.00334139	21	28	38	82	36	80
chr1	37380001	37390000	1.65713	3.7958e-06	14	21	21	88	28	84
chr1	47430001	47440000	1.10251	0.0105687	16	20	25	58	23	65
chr1	49230001	49240000	1.24309	0.0206967	14	17	10	48	13	52
chr1	49270001	49280000	1.43329	0.00528852	12	9	16	51	20	38
chr1	50580001	50590000	1.23641	0.0159013	12	17	14	56	15	45
chr1	57360001	57370000	1.11669	0.0428064	14	13	14	44	15	41
chr1	58830001	58840000	1.19622	0.0482009	18	8	11	43	10	46
chr1	59630001	59640000	1.10231	0.0393125	11	16	19	37	20	51
chr1	60650001	60660000	1.89366	0.0187531	5	7	2	27	8	25
chr1	61430001	61440000	1.25151	0.00373475	17	22	16	56	26	63
chr1	66460001	66470000	1.71412	0.0119696	3	9	8	29	12	32
chr1	66910001	66920000	1.00353	0.0281916	17	18	27	52	22	64
chr1	67110001	67120000	1.24685	0.016826	13	11	17	39	20	47
chr1	69530001	69540000	1.50551	0.0437175	8	8	4	30	9	26
chr1	71440001	71450000	1.5606	0.00960878	14	8	6	43	10	44
chr1	72050001	72060000	1.46589	0.028135	9	9	6	32	10	34
chr1	73130001	73140000	1.41751	0.0197649	9	10	9	37	13	34
chr1	74170001	74180000	1.21732	0.0411016	11	10	14	31	19	37
chr1	74340001	74350000	1.53949	0.0123199	8	6	12	31	13	40
chr1	75140001	75150000	1.42922	0.00259921	14	12	15	60	16	50
chr1	75500001	75510000	1.02711	0.0471938	18	15	17	49	14	54
chr1	77140001	77150000	1.06955	0.0158385	17	17	27	63	24	54
chr1	77150001	77160000	1.15801	0.0362474	12	12	16	38	15	47
chr1	80570001	80580000	1.52488	0.040324	3	12	6	32	11	25
chr1	81330001	81340000	1.51649	0.0187194	7	8	9	34	13	29
chr1	81620001	81630000	1.14301	0.0412023	12	14	18	54	9	52
chr1	82550001	82560000	1.72237	0.020553	2	6	10	29	10	27
chr1	84540001	84550000	1.31249	0.0377141	9	8	13	37	9	40
chr1	86280001	86290000	1.07219	0.0441832	16	13	17	50	13	48
chr1	87210001	87220000	1.18689	0.00511514	24	18	21	55	34	64
chr1	89650001	89660000	1.15075	0.0288143	12	17	16	53	20	37
chr1	91110001	91120000	1.22441	0.0486542	5	10	21	37	14	42
chr1	96340001	96350000	1.28296	0.0499792	6	11	14	25	19	35
chr1	98100001	98110000	1.18407	0.0155554	12	13	24	46	21	55
chr1	103610001	103620000	1.49006	0.0430667	11	2	10	21	14	34
chr1	106680001	106690000	1.63126	0.039249	4	7	6	24	13	19
chr1	106690001	106700000	1.97951	0.0122686	3	6	5	26	6	33
chr1	108410001	108420000	1.11978	0.0451811	9	13	20	41	15	46
chr1	111230001	111240000	1.11158	0.036239	9	25	20	54	28	42
chr1	111350001	111360000	1.19365	0.00939014	15	19	17	55	19	58
chr1	112530001	112540000	1.1328	0.0046046	15	27	31	64	32	79
chr1	112870001	112880000	1.07343	0.0029543	27	26	28	84	31	75
chr1	118870001	118880000	1.36238	0.0350738	5	11	12	38	13	29
chr1	119760001	119770000	1.21711	0.0203022	18	14	11	41	22	46
chr1	119820001	119830000	1.41041	0.0125479	6	14	13	38	18	40
chr1	121220001	121230000	1.31363	0.0377673	6	12	12	41	11	33
chr1	144850001	144860000	1.58132	0.0173611	6	10	7	24	15	36
chr1	152130001	152140000	1.42114	0.00632587	10	9	17	45	18	43
chr1	152900001	152910000	1.11914	0.0429734	17	15	11	44	13	51
chr1	157220001	157230000	1.15246	0.039717	11	13	15	43	15	39
chr1	157520001	157530000	1.00289	0.0288221	19	19	22	52	23	58
chr1	160730001	160740000	1.15049	0.00390335	20	23	22	68	25	69
chr1	163910001	163920000	1.32382	0.0368131	5	10	16	43	11	34
chr1	164210001	164220000	1.02803	0.0340769	16	14	26	55	22	48
chr1	165060001	165070000	1.52577	0.0123567	7	10	9	33	13	38
chr1	165290001	165300000	1.21468	0.00694026	22	18	14	67	21	54
chr1	165400001	165410000	1.34872	0.00157738	13	17	21	63	20	64
chr1	166010001	166020000	1.01009	0.0331864	19	16	27	65	14	66
chr1	176540001	176550000	1.15233	0.0353535	15	11	15	44	13	47
chr1	176620001	176630000	1.61539	0.0487103	4	7	5	19	10	25
chr1	177850001	177860000	1.25399	0.0271339	8	16	14	33	19	47
chr1	178400001	178410000	1.71708	0.0206457	10	5	3	30	9	29
chr1	178880001	178890000	1.13735	0.0175728	18	17	16	61	17	50
chr1	181230001	181240000	1.11511	0.0379588	14	15	14	40	17	47
chr1	181590001	181600000	1.04699	0.0306567	15	18	25	68	14	57
chr1	185900001	185910000	1.3569	0.0325608	8	8	12	38	11	32
chr1	188000001	188010000	1.45798	0.0221976	14	8	5	36	14	33
chr1	190660001	190670000	1.45114	0.0226642	6	13	8	31	12	41
chr1	191200001	191210000	1.03177	0.0448566	18	14	20	40	18	61
chr1	191650001	191660000	1.19808	0.0397774	6	16	17	41	13	48
chr1	192590001	192600000	1.6523	0.0198731	4	11	5	31	10	31
chr1	193410001	193420000	1.41317	0.0240506	4	9	17	33	14	41
chr1	195400001	195410000	1.1166	0.0486353	12	14	15	44	11	48
chr1	197450001	197460000	1.12501	0.00900774	24	17	21	54	29	64
chr1	197800001	197810000	1.08798	0.0387107	16	14	15	45	17	45
chr1	199730001	199740000	1.16712	0.032663	8	16	18	41	18	45
chr1	204790001	204800000	1.07854	0.0181741	18	18	24	63	15	69
chr1	205840001	205850000	1.01272	0.0414133	21	19	17	63	23	41
chr1	207610001	207620000	1.13941	0.00577334	16	25	29	59	35	71
chr1	211070001	211080000	1.10964	0.00868506	23	19	21	57	28	64
chr1	215700001	215710000	1.02298	0.0194632	20	19	24	59	21	64
chr1	216170001	216180000	1.12579	0.0382577	14	16	13	41	21	40
chr1	216820001	216830000	1.15187	0.00765739	20	18	25	56	34	58
chr1	217500001	217510000	1.25791	0.0132999	14	13	17	63	14	44
chr1	218960001	218970000	1.27023	0.0155406	13	13	14	40	22	42
chr1	219090001	219100000	1.06203	0.0346731	14	19	18	45	23	48
chr1	219140001	219150000	1.36124	0.0429817	7	13	8	40	7	39
chr1	221020001	221030000	1.31552	0.00703487	15	14	14	57	20	42
chr1	221890001	221900000	1.14383	0.0226659	19	16	20	78	21	37
chr1	239390001	239400000	1.09957	0.0404582	18	17	11	51	14	49
chr1	248430001	248440000	1.2448	0.0491473	5	13	14	37	14	33
chr2	50001	60000	1.11898	0.0304628	17	11	19	43	16	56
chr2	4830001	4840000	1.38099	0.0404326	10	7	8	32	10	32
chr2	6160001	6170000	1.2602	0.00603352	15	19	15	59	18	57
chr2	6980001	6990000	1.2426	0.01382	20	13	12	42	22	53
chr2	12540001	12550000	1.11216	0.0411169	14	12	16	44	15	43
chr2	13310001	13320000	1.94557	0.00698896	5	4	7	36	9	25
chr2	13460001	13470000	1.09607	0.0401781	17	13	16	36	21	50
chr2	16960001	16970000	1.04871	0.026292	20	16	19	55	19	54
chr2	17180001	17190000	1.14472	0.0453217	13	10	16	38	19	36
chr2	17340001	17350000	1.15387	0.0238521	17	13	15	43	19	49
chr2	17670001	17680000	1.22847	0.0240073	9	15	15	43	15	45
chr2	17700001	17710000	1.50391	0.0259619	5	8	12	25	19	29
chr2	18290001	18300000	1.02493	0.044931	15	14	22	47	16	54
chr2	21760001	21770000	1.13992	0.0413053	10	14	16	39	16	43
chr2	22000001	22010000	1.49498	0.0240449	7	8	10	37	7	39
chr2	23180001	23190000	1.27212	0.017648	8	15	16	44	18	42
chr2	23330001	23340000	1.44041	0.025052	10	4	14	28	13	43
chr2	30880001	30890000	1.05476	0.00437652	23	25	43	100	23	95
chr2	31330001	31340000	1.08479	0.00243927	25	28	29	78	34	80
chr2	31880001	31890000	1.42042	0.0294998	7	8	11	37	9	34
chr2	34300001	34310000	1.439	0.00103755	19	15	13	58	19	69
chr2	37740001	37750000	1.27922	0.0241901	15	12	11	40	24	33
chr2	40670001	40680000	1.26233	0.0124716	12	14	16	46	21	43
chr2	40860001	40870000	1.24111	0.0166326	9	16	18	42	22	46
chr2	41490001	41500000	1.03515	0.0296903	12	23	24	53	20	63
chr2	48130001	48140000	1.79238	0.00985017	6	7	6	42	9	25
chr2	48950001	48960000	1.3869	0.0194159	9	7	18	55	12	34
chr2	49190001	49200000	1.09814	0.0168545	15	20	23	47	25	64
chr2	49500001	49510000	1.52536	0.0158199	10	6	9	29	13	38
chr2	51880001	51890000	1.68088	0.0344547	5	6	5	26	11	19
chr2	53450001	53460000	1.31876	0.0361825	12	8	10	27	14	42
chr2	57070001	57080000	1.19511	0.0363826	12	9	16	38	15	41
chr2	59030001	59040000	1.12507	0.022407	18	12	21	57	14	57
chr2	63710001	63720000	1.28138	0.0452242	9	8	12	30	13	35
chr2	66340001	66350000	1.37412	0.00662969	12	18	10	53	16	50
chr2	69440001	69450000	1.14195	0.0109491	21	22	15	68	23	53
chr2	75740001	75750000	1.08493	0.0129613	20	16	24	59	22	61
chr2	79240001	79250000	1.10216	0.0165358	15	19	23	67	17	56
chr2	79290001	79300000	1.21943	0.0155616	15	15	17	43	28	44
chr2	80360001	80370000	1.14417	0.0336317	11	15	16	47	16	41
chr2	80480001	80490000	1.0129	0.00637295	23	30	36	72	39	83
chr2	81270001	81280000	1.04931	0.0276184	17	19	19	57	22	47
chr2	82270001	82280000	1.40585	0.0383706	10	9	6	28	10	38
chr2	82470001	82480000	1.6119	0.0331082	6	6	6	22	13	24
chr2	84840001	84850000	1.08803	0.0461362	11	13	22	40	15	55
chr2	90110001	90120000	1.2499	0.00420442	19	12	23	66	22	55
chr2	96340001	96350000	1.13781	0.00232472	27	20	29	73	36	72
chr2	103380001	103390000	1.1519	0.00161115	25	20	35	90	23	91
chr2	104810001	104820000	1.73971	0.0190293	6	5	6	28	8	29
chr2	108230001	108240000	1.32993	0.0205812	10	12	11	43	12	40
chr2	115410001	115420000	1.16923	0.0298905	14	12	18	37	15	60
chr2	117440001	117450000	1.67769	0.0287495	6	5	6	23	8	31
chr2	118220001	118230000	1.02178	0.0108927	30	22	27	80	19	88
chr2	118290001	118300000	1.01175	0.0411284	18	18	17	49	20	50
chr2	119350001	119360000	1.12281	0.0175432	24	14	17	66	20	49
chr2	123540001	123550000	1.6687	0.00874911	12	7	5	46	10	33
chr2	123580001	123590000	1.03318	0.0113096	22	19	38	65	36	71
chr2	125620001	125630000	1.07147	0.00789627	27	19	24	64	29	69
chr2	126460001	126470000	1.46459	0.000838029	15	18	13	56	27	56
chr2	126850001	126860000	1.26152	0.00575766	18	19	13	54	20	62
chr2	126980001	126990000	1.20638	0.0361379	10	15	23	36	33	40
chr2	130230001	130240000	1.24166	0.0458802	8	6	22	34	16	42
chr2	138540001	138550000	1.51757	0.046128	8	5	6	24	12	23
chr2	139490001	139500000	1.1683	0.00597617	17	20	22	70	21	59
chr2	139570001	139580000	1.19143	0.00762806	19	19	16	57	25	54
chr2	140710001	140720000	1.72956	0.00639907	9	5	8	29	12	41
chr2	143700001	143710000	1.30439	0.0304829	10	8	15	34	11	48
chr2	143810001	143820000	1.39711	0.00882165	9	16	11	41	20	43
chr2	145800001	145810000	1.26329	0.0125906	9	16	18	46	17	53
chr2	145820001	145830000	1.18447	0.02735	10	21	13	47	21	42
chr2	152460001	152470000	1.35381	0.0309127	9	6	14	37	13	32
chr2	154810001	154820000	1.58187	0.00864367	7	8	11	37	17	30
chr2	157550001	157560000	1.09671	0.0183682	17	17	20	52	19	59
chr2	157730001	157740000	1.49708	0.0125183	7	8	13	37	11	42
chr2	158170001	158180000	1.45878	0.0200542	10	7	10	37	9	40
chr2	158550001	158560000	1.51154	0.0138123	7	12	8	32	18	33
chr2	158930001	158940000	1.14875	0.0386955	13	10	17	44	15	40
chr2	159110001	159120000	1.17957	0.0371887	12	17	10	43	14	44
chr2	159220001	159230000	1.11044	0.0199868	21	14	18	47	20	61
chr2	161200001	161210000	1.1324	0.0197548	18	15	16	52	18	51
chr2	162530001	162540000	1.43314	0.0247896	6	7	14	36	11	35
chr2	163890001	163900000	1.2795	0.0326727	8	8	18	42	12	39
chr2	166090001	166100000	1.28101	0.046445	8	14	8	40	12	31
chr2	168230001	168240000	1.49742	0.0306581	6	8	9	22	12	38
chr2	180650001	180660000	1.13737	0.0381923	10	17	16	36	19	49
chr2	182090001	182100000	1.88194	0.00126917	8	7	7	36	14	41
chr2	183080001	183090000	1.30804	0.0433944	11	8	10	29	18	29
chr2	187210001	187220000	1.56159	0.0250319	8	6	8	39	12	21
chr2	188070001	188080000	1.34422	0.0346116	7	9	12	31	14	33
chr2	188190001	188200000	1.79139	0.0104601	3	6	10	26	16	27
chr2	188750001	188760000	1.14047	0.0456546	15	14	10	42	15	40
chr2	189160001	189170000	1.71269	0.00135943	9	8	11	47	14	43
chr2	189850001	189860000	1.04043	0.0437298	15	15	19	44	21	45
chr2	191450001	191460000	1.59307	0.00247275	11	11	9	40	19	44
chr2	192290001	192300000	1.07003	0.0128327	20	21	21	59	24	62
chr2	193230001	193240000	1.81389	0.00553397	7	4	9	31	16	28
chr2	194610001	194620000	1.44461	0.0415565	8	8	6	29	11	27
chr2	196220001	196230000	1.03471	0.0495498	12	16	24	62	14	46
chr2	196230001	196240000	1.11474	0.0415658	13	14	21	41	28	38
chr2	196890001	196900000	1.18663	0.0364882	15	15	9	37	16	47
chr2	196940001	196950000	1.10293	0.0489696	14	16	12	39	14	50
chr2	197250001	197260000	1.16033	0.0330937	10	13	18	43	16	43
chr2	199040001	199050000	1.28171	0.0406208	11	9	10	35	15	30
chr2	200010001	200020000	1.62131	0.0045299	9	6	13	48	12	38
chr2	201580001	201590000	1.13717	0.0153116	22	12	21	47	22	65
chr2	205350001	205360000	1.34391	0.0470254	8	8	10	24	15	32
chr2	209300001	209310000	1.28653	0.00534135	21	14	14	65	20	50
chr2	210240001	210250000	1.26803	0.0498761	11	9	9	28	14	35
chr2	212770001	212780000	1.50639	0.0301325	9	5	9	31	16	22
chr2	213180001	213190000	1.20651	0.0352357	9	16	12	42	15	39
chr2	214360001	214370000	1.56242	0.0444652	4	6	9	24	15	19
chr2	217730001	217740000	1.15749	0.0070146	16	19	24	55	24	67
chr2	218060001	218070000	1.02878	0.0213713	20	21	26	51	33	61
chr2	220800001	220810000	1.66162	0.000416725	14	10	12	48	18	63
chr2	222090001	222100000	1.42464	0.0334354	7	8	11	40	7	35
chr2	222520001	222530000	1.18386	0.0397108	13	13	11	37	18	37
chr2	222700001	222710000	1.54814	0.0170914	3	9	13	35	14	31
chr2	224040001	224050000	1.94532	8.55604e-05	7	10	11	58	17	47
chr2	224230001	224240000	1.3258	0.045863	9	6	12	35	12	28
chr2	226300001	226310000	1.00691	0.040214	17	15	23	53	22	46
chr2	227150001	227160000	1.04353	0.0261831	19	18	20	58	16	61
chr2	229380001	229390000	1.38069	0.0329477	10	6	11	37	10	33
chr2	229480001	229490000	1.20336	0.0227808	10	14	18	49	14	47
chr2	230520001	230530000	1.16551	0.019641	14	13	22	57	13	57
chr2	232690001	232700000	1.43691	0.0119197	9	11	12	51	15	31
chr2	238010001	238020000	1.37652	0.0145714	12	5	18	44	16	40
chr3	1010001	1020000	1.30458	0.0222827	11	11	12	44	16	33
chr3	4050001	4060000	1.57662	0.00214913	8	7	20	50	18	47
chr3	5540001	5550000	1.11239	0.00840755	24	17	29	60	37	62
chr3	6390001	6400000	1.12722	0.00811445	20	21	23	79	25	52
chr3	7890001	7900000	1.35774	0.0107957	12	9	15	45	17	40
chr3	17040001	17050000	1.48633	0.0146134	9	10	9	45	15	27
chr3	18650001	18660000	1.19142	0.00231188	19	21	25	65	27	73
chr3	19700001	19710000	1.30234	0.0405226	11	12	7	36	10	40
chr3	19850001	19860000	1.07913	0.0266283	11	23	21	51	23	54
chr3	20880001	20890000	1.41622	0.00824243	11	11	12	47	14	42
chr3	22250001	22260000	1.0912	0.0470725	16	17	12	47	12	53
chr3	22330001	22340000	1.9145	0.0085505	5	6	5	22	15	27
chr3	24760001	24770000	1.20213	0.0467214	19	10	8	47	15	34
chr3	28210001	28220000	1.86584	0.0234443	8	2	4	27	9	21
chr3	28230001	28240000	1.24958	0.0151248	14	14	16	55	11	57
chr3	28890001	28900000	1.18907	0.0459192	8	11	20	50	17	30
chr3	29110001	29120000	1.1403	0.0406368	12	16	13	39	14	50
chr3	30780001	30790000	1.02836	0.0109744	24	22	26	77	26	61
chr3	31360001	31370000	1.27466	0.00136037	24	17	19	72	25	66
chr3	34330001	34340000	1.26064	0.0163548	11	12	18	50	20	37
chr3	34810001	34820000	1.26868	0.00471103	14	15	21	62	20	53
chr3	36290001	36300000	1.24708	0.0185367	12	13	14	43	17	43
chr3	37740001	37750000	1.00528	0.00516185	30	40	26	92	30	99
chr3	39590001	39600000	1.13288	0.00694441	21	25	20	83	24	57
chr3	51080001	51090000	1.00346	0.032644	20	22	17	59	21	53
chr3	51360001	51370000	1.05793	0.0418447	19	12	17	50	17	45
chr3	53610001	53620000	1.03711	0.0015209	39	36	35	86	49	110
chr3	54820001	54830000	1.21124	0.020716	13	15	14	46	21	39
chr3	55200001	55210000	1.09124	0.00827097	22	25	20	66	22	75
chr3	56520001	56530000	1.17297	0.00871199	19	15	21	64	17	61
chr3	58660001	58670000	1.02775	0.0138864	25	23	21	60	26	71
chr3	59280001	59290000	1.18507	0.0332507	7	26	14	48	22	48
chr3	60330001	60340000	1.0608	0.024564	20	14	21	57	20	51
chr3	64170001	64180000	1.10292	0.0116311	26	13	23	59	25	63
chr3	67460001	67470000	1.23734	0.0184289	13	13	15	38	17	53
chr3	67720001	67730000	1.27637	0.0165955	12	15	12	49	13	47
chr3	67850001	67860000	1.34192	0.0325051	13	13	5	33	13	44
chr3	68020001	68030000	1.22894	0.0460047	12	7	14	38	16	30
chr3	81150001	81160000	2.32905	0.0021567	3	2	7	29	10	28
chr3	82000001	82010000	1.06367	0.00545049	28	27	24	92	26	70
chr3	82100001	82110000	1.13679	0.027903	14	16	16	54	13	50
chr3	82110001	82120000	1.24934	0.0119278	14	14	16	58	17	43
chr3	82210001	82220000	1.10982	0.0426818	13	12	18	51	14	40
chr3	82330001	82340000	1.2153	0.0452431	12	9	13	43	10	38
chr3	83730001	83740000	1.46425	0.0338336	7	9	8	26	18	25
chr3	86570001	86580000	1.46912	0.0474755	5	11	5	28	10	28
chr3	87230001	87240000	1.26099	0.0386878	13	13	7	36	17	34
chr3	87520001	87530000	1.71404	0.0064449	9	7	6	30	14	36
chr3	88410001	88420000	1.31419	0.0395612	9	14	7	38	10	39
chr3	88580001	88590000	1.46612	0.0471428	11	7	4	36	8	27
chr3	98110001	98120000	1.36907	0.0171856	10	12	10	44	13	37
chr3	98740001	98750000	1.32895	0.0292507	10	10	11	35	10	45
chr3	100250001	100260000	1.05094	0.00232248	28	31	33	81	40	87
chr3	106490001	106500000	1.18321	0.0469913	13	8	16	32	20	37
chr3	106920001	106930000	1.54265	0.0280468	8	8	5	30	12	26
chr3	108450001	108460000	1.14021	0.00474455	21	17	27	71	23	67
chr3	110140001	110150000	1.03138	0.0371261	15	16	23	53	23	44
chr3	111100001	111110000	1.73411	0.0224272	4	4	9	24	13	23
chr3	111590001	111600000	1.02225	0.0129431	26	30	25	57	30	97
chr3	111920001	111930000	1.65649	0.0347393	1	7	10	25	12	24
chr3	113100001	113110000	1.19108	0.0207635	8	20	19	55	20	44
chr3	113970001	113980000	1.17855	0.0123102	22	12	17	55	19	56
chr3	117450001	117460000	1.21282	0.0196516	10	17	17	52	13	53
chr3	118600001	118610000	1.0538	0.0193043	30	25	16	76	17	82
chr3	120570001	120580000	1.23497	0.0137236	12	15	16	46	18	49
chr3	120710001	120720000	1.5389	0.035236	6	7	7	33	9	24
chr3	123310001	123320000	1.04181	0.0458116	16	14	19	50	21	39
chr3	131270001	131280000	1.468	0.0155676	12	5	11	36	15	34
chr3	132680001	132690000	1.27049	0.020498	11	9	18	37	18	45
chr3	134660001	134670000	1.22852	0.0121517	16	11	18	50	19	48
chr3	135260001	135270000	1.37532	0.0218523	10	9	11	42	11	36
chr3	136800001	136810000	1.28076	0.0143302	15	12	12	46	17	43
chr3	137000001	137010000	1.0424	0.0425133	11	18	22	48	21	46
chr3	139440001	139450000	1.40565	0.00601813	23	11	8	56	17	55
chr3	139690001	139700000	1.03585	0.00337646	26	28	33	81	29	91
chr3	139700001	139710000	1.51452	0.00408353	12	8	13	43	14	50
chr3	140570001	140580000	1.32796	0.0213977	14	15	7	38	13	54
chr3	142900001	142910000	1.03435	0.00780925	26	24	26	79	29	65
chr3	143400001	143410000	1.1732	0.0190513	15	18	13	49	18	50
chr3	143470001	143480000	1.08299	0.0423823	18	15	13	52	14	46
chr3	147590001	147600000	1.44641	0.0283397	3	9	16	41	10	36
chr3	148290001	148300000	1.30446	0.0206119	12	16	8	42	14	46
chr3	151250001	151260000	1.0437	0.0297783	17	19	18	55	18	53
chr3	151470001	151480000	1.25924	0.0280542	13	10	12	37	13	45
chr3	155100001	155110000	1.17693	0.0224594	12	12	20	48	18	44
chr3	156660001	156670000	1.74567	0.0379246	4	6	4	22	8	23
chr3	157360001	157370000	1.32339	0.0182602	13	9	12	39	15	41
chr3	159040001	159050000	1.72333	0.00637295	7	9	6	37	10	37
chr3	159350001	159360000	1.08739	0.0410743	17	22	10	48	21	47
chr3	160530001	160540000	1.17355	0.0348367	16	7	18	40	18	43
chr3	164560001	164570000	1.33421	0.0346768	6	10	13	37	12	33
chr3	164870001	164880000	1.18994	0.0479903	17	7	12	35	14	43
chr3	166890001	166900000	1.07951	0.0257629	14	18	20	49	19	55
chr3	167980001	167990000	1.34649	0.00130656	17	18	17	67	21	62
chr3	168100001	168110000	1.10093	0.0193634	18	13	25	47	25	58
chr3	169810001	169820000	1.22732	0.0473968	10	12	10	35	16	31
chr3	170300001	170310000	1.09787	0.0441832	15	9	26	37	24	52
chr3	170720001	170730000	1.59059	3.58848e-05	17	11	28	84	33	66
chr3	170770001	170780000	1.24165	0.00944183	13	14	19	51	18	53
chr3	172210001	172220000	1.09891	0.00711541	22	22	22	64	28	64
chr3	173360001	173370000	1.0116	0.0341602	14	22	22	52	19	61
chr3	173770001	173780000	1.24087	0.0462422	8	15	10	29	16	41
chr3	173990001	174000000	1.244	0.0175251	8	17	18	46	15	55
chr3	174250001	174260000	1.06913	0.0264313	20	18	17	46	26	53
chr3	174450001	174460000	1.53834	0.00138633	7	13	19	51	23	49
chr3	176570001	176580000	1.16201	0.0394499	16	16	10	56	12	42
chr3	177620001	177630000	1.07557	0.00987341	29	20	19	66	24	72
chr3	177720001	177730000	1.19454	0.0411063	7	15	17	40	21	34
chr3	180450001	180460000	1.40336	0.0175679	6	9	16	38	14	39
chr3	180460001	180470000	1.02293	0.0436283	12	28	21	47	20	74
chr3	180810001	180820000	1.40899	0.0344903	7	7	13	29	19	26
chr3	181110001	181120000	1.9218	0.0137755	5	5	4	22	10	27
chr3	187270001	187280000	1.36096	0.0367059	8	12	8	42	9	33
chr3	187570001	187580000	1.08173	0.01246	22	21	20	54	28	64
chr3	192910001	192920000	1.31718	0.0223941	7	9	20	39	19	38
chr4	9770001	9780000	1.11276	0.00330419	27	27	21	74	28	81
chr4	10940001	10950000	1.22943	0.01382	12	17	16	58	15	48
chr4	11040001	11050000	1.07268	0.0284415	16	15	21	58	19	45
chr4	11180001	11190000	1.03298	0.0125043	28	20	22	71	22	70
chr4	12490001	12500000	1.67037	0.0117726	5	8	9	23	16	36
chr4	14400001	14410000	1.58535	0.00145109	14	8	12	47	19	47
chr4	16350001	16360000	1.06768	0.0026388	32	21	32	82	32	84
chr4	17070001	17080000	1.15761	0.00833103	18	17	22	52	26	61
chr4	18980001	18990000	1.08657	0.0124461	27	21	17	64	20	75
chr4	19140001	19150000	1.09821	0.0344197	10	17	21	53	16	47
chr4	19790001	19800000	1.17634	0.032778	15	15	11	42	13	52
chr4	23400001	23410000	1.37085	0.0297752	8	7	16	25	18	42
chr4	23430001	23440000	1.37945	0.0334765	10	9	9	23	16	40
chr4	26010001	26020000	1.06837	0.0197843	20	21	17	55	25	54
chr4	26630001	26640000	1.22475	0.0183193	21	10	15	42	26	46
chr4	29000001	29010000	1.19531	0.0413931	9	13	14	39	12	43
chr4	29550001	29560000	1.22443	0.0309775	19	11	10	51	19	33
chr4	32170001	32180000	1.23191	0.026618	15	12	12	41	22	35
chr4	36280001	36290000	1.11763	0.0298523	14	14	19	39	20	53
chr4	36430001	36440000	1.07005	0.0441832	16	14	16	44	21	40
chr4	37260001	37270000	1.13988	0.0490385	8	18	14	45	13	43
chr4	38430001	38440000	1.3428	0.0491575	7	10	9	23	14	35
chr4	42950001	42960000	1.03616	0.0470364	11	19	20	50	20	43
chr4	44640001	44650000	1.58455	0.0296918	4	5	11	25	12	28
chr4	46390001	46400000	1.25033	0.0280902	16	12	9	45	12	45
chr4	48990001	49000000	1.10513	0.00415643	28	19	25	74	26	74
chr4	54390001	54400000	1.11413	0.0116974	19	16	25	63	17	69
chr4	54540001	54550000	1.38814	0.0154068	13	11	9	31	19	44
chr4	54620001	54630000	1.5114	0.0283455	5	8	9	30	11	29
chr4	58310001	58320000	1.18646	0.0143253	18	11	23	46	28	51
chr4	58920001	58930000	1.36222	0.0103172	13	14	12	33	23	52
chr4	59250001	59260000	1.43399	0.0263756	8	13	6	36	16	28
chr4	60650001	60660000	1.51209	0.0186852	8	9	8	38	15	25
chr4	65050001	65060000	1.8357	0.0206606	8	2	5	23	9	28
chr4	65250001	65260000	1.64576	0.0201963	10	5	6	22	18	28
chr4	66640001	66650000	1.11733	0.0224129	13	17	23	43	20	65
chr4	70020001	70030000	1.29903	0.0208798	15	9	14	30	19	53
chr4	71030001	71040000	1.37444	0.0459031	8	5	13	24	16	31
chr4	76300001	76310000	1.41129	0.0334454	10	4	12	29	14	32
chr4	76340001	76350000	1.2669	0.0084386	16	16	13	53	20	48
chr4	76360001	76370000	1.21165	0.0412728	8	12	15	40	12	40
chr4	78270001	78280000	1.68088	0.0226143	5	7	7	18	12	37
chr4	79930001	79940000	1.4529	0.0253577	13	8	6	29	11	45
chr4	80170001	80180000	1.006	0.0313412	17	23	19	56	21	56
chr4	80340001	80350000	1.47012	0.0272572	12	8	5	32	10	38
chr4	80600001	80610000	1.31562	0.0129579	10	9	20	45	16	47
chr4	81710001	81720000	1.41684	0.0138319	7	13	12	32	17	45
chr4	82080001	82090000	1.25776	0.0155147	11	16	14	44	21	42
chr4	82660001	82670000	1.32662	0.0431436	5	11	12	29	14	34
chr4	84760001	84770000	1.30124	0.0434165	9	6	16	45	10	32
chr4	85290001	85300000	1.5754	0.00371499	12	9	9	38	16	46
chr4	86280001	86290000	1.15891	0.0497526	11	12	13	34	14	42
chr4	88870001	88880000	1.0275	0.0199362	22	26	19	64	30	55
chr4	91680001	91690000	1.42128	0.0123631	11	9	11	42	13	39
chr4	92680001	92690000	1.27729	0.0425313	12	17	6	46	19	28
chr4	97000001	97010000	1.2648	0.0198882	12	9	18	37	20	44
chr4	98570001	98580000	1.78102	0.018962	5	6	5	26	8	29
chr4	106860001	106870000	1.47835	0.000208239	18	13	21	73	22	69
chr4	106950001	106960000	2.0278	0.00530974	4	5	6	22	11	35
chr4	110160001	110170000	1.09621	0.0371603	16	11	21	38	19	56
chr4	114030001	114040000	1.1014	0.0197548	17	19	21	65	26	42
chr4	114550001	114560000	1.4747	0.0248503	8	7	9	31	11	33
chr4	119090001	119100000	1.12903	0.0436283	18	15	9	45	16	43
chr4	120420001	120430000	1.13856	0.0469217	13	16	10	41	15	41
chr4	120550001	120560000	1.26315	0.0364476	12	8	13	36	18	31
chr4	121060001	121070000	1.0673	0.0347808	12	21	19	45	18	60
chr4	122420001	122430000	1.56171	0.0378666	5	6	8	26	13	21
chr4	124840001	124850000	1.27532	0.0245001	9	16	12	33	19	46
chr4	125130001	125140000	1.16743	0.0408252	14	9	15	37	15	43
chr4	125940001	125950000	1.72753	0.0280626	4	5	7	21	13	22
chr4	126560001	126570000	1.21306	0.0112789	14	14	19	48	21	51
chr4	126980001	126990000	1.22639	0.049665	12	11	9	29	16	37
chr4	127050001	127060000	1.02025	0.0401396	16	22	20	52	29	44
chr4	128030001	128040000	2.06109	0.0149351	4	3	5	26	12	15
chr4	132480001	132490000	1.32526	0.00862162	16	10	15	56	15	46
chr4	141790001	141800000	1.10533	0.044475	14	13	17	46	11	53
chr4	142230001	142240000	1.42664	0.0218157	9	10	9	33	10	44
chr4	142560001	142570000	1.15368	0.0110168	17	16	21	52	25	54
chr4	142900001	142910000	1.2407	0.0499012	6	11	15	41	12	32
chr4	143660001	143670000	1.48563	0.0134188	7	13	8	40	13	36
chr4	149900001	149910000	1.38902	0.0151994	9	9	17	34	13	57
chr4	149950001	149960000	1.46982	0.0198991	5	10	12	42	11	32
chr4	157790001	157800000	1.04026	0.0366819	19	13	20	54	19	46
chr4	158940001	158950000	1.43991	0.00684336	9	13	13	50	12	48
chr4	159080001	159090000	1.1158	0.0219705	17	14	21	61	14	55
chr4	164740001	164750000	1.23258	0.0291325	11	13	12	38	16	40
chr4	172050001	172060000	1.18421	0.0477003	8	12	18	50	10	40
chr4	173360001	173370000	1.16678	0.0332982	11	13	16	39	16	45
chr4	173780001	173790000	1.22783	0.0407843	7	20	11	51	13	39
chr4	175890001	175900000	1.28686	0.0127426	16	13	12	53	13	50
chr4	177500001	177510000	1.29701	0.00309884	19	21	14	56	30	58
chr4	177670001	177680000	2.18699	0.00881157	1	3	8	21	14	21
chr4	177710001	177720000	1.19711	0.0473469	12	14	9	39	11	43
chr4	180950001	180960000	1.15145	0.0425579	8	16	16	45	16	38
chr4	181500001	181510000	1.05834	0.02213	18	19	20	49	22	61
chr5	10900001	10910000	1.26389	0.0124716	15	12	21	37	29	54
chr5	11390001	11400000	1.16154	0.00603761	22	13	29	78	22	61
chr5	12020001	12030000	1.2841	0.0367893	10	11	11	38	9	44
chr5	15160001	15170000	1.3797	0.0293807	8	7	15	40	8	43
chr5	16150001	16160000	1.48558	0.0468109	6	6	8	24	13	23
chr5	16190001	16200000	1.2429	0.0187363	14	9	18	45	14	51
chr5	17960001	17970000	1.11775	0.0263769	12	19	17	48	18	51
chr5	18420001	18430000	1.80642	0.0171385	3	8	5	24	11	27
chr5	18680001	18690000	1.12218	0.00580555	22	30	19	81	29	63
chr5	20190001	20200000	1.5099	0.0120392	12	5	11	31	16	40
chr5	20340001	20350000	1.24207	0.0164161	15	13	13	49	18	41
chr5	24800001	24810000	1.51268	0.0488721	6	9	4	24	10	27
chr5	32680001	32690000	1.01243	0.0446902	12	19	23	49	17	57
chr5	33860001	33870000	1.18536	0.0363474	16	12	14	35	26	38
chr5	35930001	35940000	1.089	0.0120134	21	21	19	57	25	62
chr5	38280001	38290000	1.10849	0.0415147	9	20	17	47	14	53
chr5	40170001	40180000	1.25274	0.0410846	6	10	20	41	19	31
chr5	40480001	40490000	1.22152	0.0362397	9	12	15	32	18	41
chr5	40620001	40630000	1.67688	0.0315703	9	5	3	29	10	22
chr5	41130001	41140000	1.15789	0.0129825	13	17	24	49	26	55
chr5	42120001	42130000	1.07453	0.0487117	13	19	13	46	19	40
chr5	42420001	42430000	1.2841	0.0214937	13	8	16	42	12	49
chr5	42620001	42630000	1.50157	0.00523108	11	6	20	37	25	47
chr5	42880001	42890000	1.00863	0.0110112	21	23	33	82	25	67
chr5	50350001	50360000	1.18068	0.0414434	11	16	12	32	21	42
chr5	52470001	52480000	1.32595	0.0458459	12	11	6	31	19	27
chr5	52540001	52550000	1.57411	0.0035748	9	15	8	37	21	46
chr5	54100001	54110000	1.02798	0.0158754	24	20	23	59	29	61
chr5	57410001	57420000	1.11693	0.0314932	13	13	20	48	20	41
chr5	59880001	59890000	1.00807	0.0413462	20	13	21	51	19	51
chr5	60570001	60580000	1.18109	0.018607	19	14	13	51	16	52
chr5	61250001	61260000	1.19401	0.0270183	12	10	19	43	19	40
chr5	61320001	61330000	1.34848	0.0484774	9	6	10	29	11	31
chr5	67090001	67100000	1.12634	0.00396606	25	20	24	65	27	76
chr5	73700001	73710000	1.17923	0.0364388	17	10	12	42	18	37
chr5	75390001	75400000	1.62654	0.0238457	6	6	7	24	11	30
chr5	80440001	80450000	1.23142	0.0279994	20	10	12	54	10	53
chr5	81880001	81890000	1.08449	0.0405588	14	12	23	60	17	39
chr5	84250001	84260000	1.26644	0.0415776	7	8	18	42	12	35
chr5	86930001	86940000	1.3997	0.0441942	7	7	11	31	7	39
chr5	87750001	87760000	1.40717	0.0212776	13	8	9	28	19	38
chr5	88550001	88560000	1.23663	0.0275663	8	14	16	48	13	41
chr5	89220001	89230000	1.24885	0.0391136	5	20	13	36	20	42
chr5	93530001	93540000	1.14341	0.0161086	23	13	16	53	21	54
chr5	94620001	94630000	1.3598	0.033603	11	6	11	37	10	35
chr5	94670001	94680000	1.12251	0.0463741	16	10	15	35	19	43
chr5	97560001	97570000	1.21255	0.0475428	7	12	15	31	16	39
chr5	99520001	99530000	1.07771	0.046484	12	10	26	45	17	50
chr5	101120001	101130000	1.04857	0.0292316	21	13	21	57	17	55
chr5	101750001	101760000	1.23599	0.0301444	11	10	15	36	18	38
chr5	102410001	102420000	1.04116	0.0228009	25	13	23	62	23	54
chr5	104730001	104740000	1.81625	0.0115375	7	6	5	32	16	19
chr5	105360001	105370000	1.15306	0.025012	10	18	20	40	20	58
chr5	106190001	106200000	1.09174	0.0356371	22	10	19	57	13	56
chr5	107970001	107980000	1.33779	0.00355718	19	21	10	54	26	60
chr5	110640001	110650000	1.41198	0.0256867	12	7	8	36	12	33
chr5	111250001	111260000	1.22004	0.0436035	11	12	10	34	14	38
chr5	111840001	111850000	1.1954	0.0251251	17	11	15	51	21	35
chr5	114150001	114160000	1.4004	0.0113723	9	11	13	44	13	42
chr5	114410001	114420000	1.24333	0.0394182	12	13	10	36	10	51
chr5	114800001	114810000	1.19082	0.0420272	11	12	16	30	23	40
chr5	114830001	114840000	1.24789	0.0258974	13	9	15	36	19	40
chr5	115610001	115620000	1.02943	0.0388589	15	14	24	47	19	54
chr5	116660001	116670000	1.33604	0.0316546	6	10	14	33	16	33
chr5	117780001	117790000	1.31146	0.0385374	17	9	6	30	16	42
chr5	117790001	117800000	1.05403	0.0205986	14	22	24	54	22	63
chr5	117970001	117980000	1.06996	0.0377864	20	12	18	44	16	59
chr5	119410001	119420000	1.13579	0.0305881	10	23	15	46	22	48
chr5	119910001	119920000	1.16743	0.0469001	9	16	14	53	12	36
chr5	119960001	119970000	1.31154	0.00833254	13	19	11	55	17	50
chr5	121390001	121400000	1.33425	0.0441382	12	9	6	33	13	30
chr5	122530001	122540000	1.11243	0.00293176	33	24	27	102	21	90
chr5	127710001	127720000	1.41949	0.037531	6	8	10	33	12	26
chr5	127940001	127950000	1.09625	0.0435166	18	13	13	50	16	40
chr5	129990001	130000000	1.31318	0.0464983	9	9	9	28	12	35
chr5	135700001	135710000	1.15514	0.0185327	9	23	20	56	20	54
chr5	136270001	136280000	1.30595	0.0160292	11	9	18	36	19	47
chr5	136290001	136300000	1.26368	0.0181888	14	9	16	48	14	44
chr5	136430001	136440000	1.07262	0.0190554	23	14	25	50	30	59
chr5	142760001	142770000	1.20303	0.0289119	13	10	16	44	13	45
chr5	142890001	142900000	1.69637	0.00620942	5	7	11	32	14	36
chr5	143950001	143960000	1.62728	0.0491604	3	8	5	24	7	26
chr5	147640001	147650000	1.23779	0.018218	14	8	20	44	18	47
chr5	147750001	147760000	1.11288	0.0223968	16	19	16	60	18	47
chr5	148310001	148320000	1.37288	0.0145714	10	13	12	35	13	56
chr5	150200001	150210000	1.63958	0.00684563	11	7	12	46	6	62
chr5	153000001	153010000	1.11346	0.0193603	17	15	21	53	25	46
chr5	153030001	153040000	1.32936	0.0130277	11	8	21	47	22	38
chr5	155070001	155080000	1.19393	0.0475358	9	10	17	36	11	47
chr5	155520001	155530000	1.29291	0.0453413	10	8	13	23	15	45
chr5	155700001	155710000	1.23613	0.0142006	14	11	18	48	16	50
chr5	156670001	156680000	1.10455	0.00601813	22	21	25	61	30	69
chr5	159270001	159280000	1.1467	0.00133735	19	31	34	86	38	79
chr5	160050001	160060000	1.12305	0.0346501	13	18	15	38	17	58
chr5	160480001	160490000	1.28744	0.0370113	8	12	11	31	13	41
chr5	162530001	162540000	1.08981	0.0303539	16	15	18	42	19	55
chr5	162990001	163000000	1.31708	0.0193783	10	13	11	42	15	38
chr5	163760001	163770000	1.26627	0.0137789	9	16	17	42	20	49
chr5	164130001	164140000	1.3079	0.00932451	12	18	12	48	16	55
chr5	165580001	165590000	1.01557	0.0241235	24	15	28	50	29	67
chr5	168870001	168880000	1.32826	0.00547527	15	15	13	53	18	51
chr5	168900001	168910000	1.47464	0.0151582	10	8	11	45	8	42
chr6	4500001	4510000	1.09544	0.0154289	22	19	19	50	21	74
chr6	5910001	5920000	1.24762	0.00574365	13	18	23	74	21	49
chr6	6230001	6240000	1.66969	0.0382057	3	4	11	16	12	33
chr6	18920001	18930000	1.26405	0.0449821	10	8	12	36	13	31
chr6	39450001	39460000	1.24235	0.0225694	13	17	10	49	19	37
chr6	39630001	39640000	1.21904	0.00333651	22	24	15	68	23	71
chr6	44540001	44550000	1.11081	0.00213325	26	23	29	81	31	75
chr6	48590001	48600000	1.85768	0.00608019	6	6	6	31	14	26
chr6	48630001	48640000	1.28675	0.0435205	10	8	11	34	11	35
chr6	48720001	48730000	1.43895	0.0084734	10	8	19	35	25	44
chr6	49660001	49670000	1.44608	0.0122381	11	8	12	43	10	45
chr6	49810001	49820000	1.15389	0.0237539	14	15	16	51	15	48
chr6	51060001	51070000	1.46392	0.016874	7	12	9	29	17	38
chr6	51830001	51840000	1.18308	0.0351369	11	12	16	43	19	34
chr6	52020001	52030000	1.64251	0.00617453	6	8	12	32	12	48
chr6	53480001	53490000	1.26387	0.0270995	11	10	14	45	13	37
chr6	55760001	55770000	1.44613	0.0288984	7	7	12	31	18	25
chr6	56190001	56200000	2.08579	0.000373264	10	4	6	40	16	38
chr6	56790001	56800000	1.16935	0.0346755	13	11	16	39	20	38
chr6	62710001	62720000	1.32491	0.0474871	7	8	13	24	17	33
chr6	65430001	65440000	1.00873	0.042651	17	16	24	45	17	68
chr6	65760001	65770000	1.75339	0.0335488	5	5	5	21	6	32
chr6	67830001	67840000	1.80727	0.0278724	4	4	6	22	8	25
chr6	69420001	69430000	1.4836	0.0250418	7	14	7	35	22	24
chr6	70070001	70080000	1.40261	0.0426848	10	8	6	32	13	25
chr6	70830001	70840000	1.03217	0.0401313	18	19	16	50	15	60
chr6	71840001	71850000	1.79164	0.0160046	8	5	4	33	7	29
chr6	72510001	72520000	1.14093	0.0328143	12	15	16	38	18	49
chr6	72580001	72590000	1.21853	0.0364092	11	10	15	46	15	32
chr6	73620001	73630000	1.23351	0.0138888	16	13	15	54	14	51
chr6	79020001	79030000	1.39117	0.0477003	8	13	5	22	16	36
chr6	79050001	79060000	1.4449	0.0226923	7	8	12	32	10	42
chr6	80580001	80590000	1.32131	0.0107659	15	11	13	41	21	44
chr6	80990001	81000000	1.06699	0.0390215	15	12	24	42	24	48
chr6	81860001	81870000	1.81435	0.0231073	2	5	8	23	11	23
chr6	82400001	82410000	1.24582	0.0107924	19	9	19	52	23	46
chr6	84170001	84180000	1.13299	0.027831	17	11	21	53	24	38
chr6	84810001	84820000	1.09478	0.0346731	13	18	17	47	14	57
chr6	87540001	87550000	1.04636	0.0419268	17	13	23	61	21	38
chr6	88620001	88630000	1.0653	0.0132977	14	23	32	72	28	58
chr6	91900001	91910000	1.60097	0.00391671	9	7	13	47	15	36
chr6	92660001	92670000	1.21298	0.0440423	9	10	15	36	12	41
chr6	93710001	93720000	1.47277	0.0304248	9	8	6	29	11	32
chr6	93820001	93830000	1.22569	0.0131703	16	17	13	46	24	47
chr6	98170001	98180000	1.16482	0.0487103	15	15	9	31	20	44
chr6	98470001	98480000	1.66664	0.0168006	5	5	10	29	14	25
chr6	98940001	98950000	1.34805	0.0245175	16	4	15	33	15	51
chr6	99500001	99510000	1.3126	0.00498767	12	17	18	53	26	47
chr6	100200001	100210000	1.19748	0.00708252	20	15	21	59	29	50
chr6	100630001	100640000	1.33965	0.0241199	8	10	13	38	13	37
chr6	100720001	100730000	1.12709	0.0178057	22	13	17	54	20	53
chr6	104620001	104630000	1.21871	0.0316216	15	9	13	38	14	45
chr6	110100001	110110000	1.31542	0.0179668	11	15	12	43	24	33
chr6	112140001	112150000	1.12477	0.0321562	13	14	22	57	23	35
chr6	113560001	113570000	1.08737	0.0455047	14	19	12	40	18	49
chr6	116700001	116710000	1.44278	0.00333639	11	12	15	46	21	46
chr6	117490001	117500000	1.19317	0.0344903	15	13	11	34	16	50
chr6	123840001	123850000	1.2744	0.0204512	12	18	9	39	20	45
chr6	123990001	124000000	1.28458	0.0404109	6	9	18	41	10	41
chr6	124370001	124380000	1.61653	0.0216554	7	8	6	38	13	20
chr6	124550001	124560000	1.15668	0.0306446	14	10	20	46	13	53
chr6	125360001	125370000	1.45125	0.00287586	9	12	19	44	22	53
chr6	125830001	125840000	1.09673	0.0464993	16	13	15	44	22	35
chr6	129260001	129270000	1.18753	0.0171129	18	18	11	50	20	50
chr6	129780001	129790000	1.04847	0.0141368	17	21	27	62	22	67
chr6	130110001	130120000	1.0338	0.00510679	22	30	33	76	36	78
chr6	130650001	130660000	1.17647	0.030762	12	14	19	64	11	44
chr6	132460001	132470000	1.27201	0.0469913	12	11	7	36	15	29
chr6	134140001	134150000	1.18333	0.0129768	13	16	20	54	17	55
chr6	135910001	135920000	1.11009	0.0457843	23	8	15	54	16	42
chr6	139690001	139700000	1.33898	0.0271526	10	11	9	36	15	33
chr6	142160001	142170000	1.15797	0.0476632	15	9	14	35	13	48
chr6	142740001	142750000	1.20784	0.0159542	16	18	12	48	16	58
chr6	143160001	143170000	1.03166	0.0112778	29	20	25	67	33	64
chr6	144930001	144940000	1.71453	0.00382073	4	8	13	39	13	40
chr6	145430001	145440000	1.37414	0.015435	13	11	13	44	26	29
chr6	146390001	146400000	1.02768	0.0244519	20	21	19	62	18	60
chr6	147010001	147020000	1.37318	0.0431699	13	6	7	31	15	27
chr6	147450001	147460000	1.17566	0.0279668	13	12	16	44	18	40
chr6	148070001	148080000	1.08759	0.0221212	14	20	22	48	27	53
chr6	152840001	152850000	1.10307	0.0208279	13	22	19	61	18	53
chr6	159830001	159840000	1.27625	0.0162987	11	10	21	37	23	48
chr7	7440001	7450000	1.07569	0.0297999	16	23	16	58	14	64
chr7	8380001	8390000	1.20506	0.0127077	16	15	20	42	29	53
chr7	8740001	8750000	1.42264	0.0274955	8	12	8	46	8	35
chr7	11390001	11400000	1.06128	0.0191909	24	22	15	64	22	58
chr7	11790001	11800000	1.10129	0.0432221	11	17	17	45	22	37
chr7	12180001	12190000	1.00585	0.0336122	20	17	21	63	18	51
chr7	13420001	13430000	1.68046	0.015461	7	3	10	29	11	31
chr7	13460001	13470000	1.06829	0.0335821	20	13	19	44	25	48
chr7	14920001	14930000	1.09503	0.0471935	21	13	11	41	16	52
chr7	16330001	16340000	1.27017	0.0367706	12	7	13	38	12	37
chr7	18630001	18640000	1.13471	0.0321071	14	11	19	43	20	42
chr7	19490001	19500000	1.4567	0.00198023	13	11	17	45	20	60
chr7	20970001	20980000	1.20975	0.00647658	16	19	19	50	23	66
chr7	22790001	22800000	1.24665	0.0182815	10	16	15	39	17	53
chr7	24040001	24050000	1.71729	0.0306229	5	4	8	15	12	33
chr7	24260001	24270000	1.02342	0.0125999	21	19	31	64	27	68
chr7	26960001	26970000	1.15919	0.0215724	12	18	16	51	17	48
chr7	29350001	29360000	1.26073	0.00531112	25	15	14	60	28	53
chr7	32190001	32200000	1.28601	0.00420262	19	15	15	54	21	59
chr7	37690001	37700000	1.03015	0.0376506	16	23	16	61	18	49
chr7	39000001	39010000	1.03195	0.0353618	18	14	21	52	20	48
chr7	42780001	42790000	1.15783	0.0423583	11	12	15	42	13	41
chr7	43130001	43140000	1.27563	0.0326459	9	12	12	45	12	34
chr7	43430001	43440000	1.16585	0.0224451	15	13	17	55	16	43
chr7	45340001	45350000	1.37813	0.0111198	14	9	12	48	13	43
chr7	45480001	45490000	1.26121	0.0313875	10	11	13	34	13	45
chr7	48200001	48210000	1.51503	0.0292084	7	5	10	32	12	25
chr7	48700001	48710000	1.26897	0.033227	7	10	17	42	14	35
chr7	48760001	48770000	1.02678	0.0325884	19	18	19	50	25	49
chr7	51790001	51800000	1.21439	0.041232	11	8	21	46	22	29
chr7	52530001	52540000	1.05381	0.0302696	13	15	28	57	21	50
chr7	54240001	54250000	1.11749	0.04473	13	14	19	36	27	40
chr7	54580001	54590000	1.7288	0.0238457	3	6	8	30	7	28
chr7	61990001	62000000	1.25958	1.83728e-05	32	32	45	145	45	101
chr7	62290001	62300000	1.46908	0.0499241	6	6	8	25	12	23
chr7	62370001	62380000	1.35546	0.0190917	10	10	13	46	10	42
chr7	78000001	78010000	1.77824	0.0315703	7	6	2	25	6	30
chr7	78100001	78110000	1.32871	0.0194916	16	6	14	35	20	42
chr7	80030001	80040000	1.84304	0.00189454	8	6	8	40	14	34
chr7	81360001	81370000	1.32368	0.0442933	7	11	9	32	13	30
chr7	82950001	82960000	1.44899	0.0279589	5	9	11	35	12	29
chr7	88100001	88110000	1.11934	0.0236691	13	14	23	53	21	45
chr7	90850001	90860000	1.52161	0.00328421	7	17	11	46	19	47
chr7	92780001	92790000	1.17178	0.0298983	17	13	12	38	17	51
chr7	92810001	92820000	1.31791	0.0199542	11	8	15	40	15	39
chr7	93300001	93310000	1.54606	0.00983046	6	9	12	39	16	31
chr7	95010001	95020000	1.01152	0.0460934	23	17	16	50	27	44
chr7	95390001	95400000	1.15587	0.0403155	10	11	21	52	12	43
chr7	96550001	96560000	1.08854	0.0108934	17	24	23	67	27	56
chr7	97100001	97110000	1.16127	0.0338502	12	13	15	39	17	43
chr7	99420001	99430000	1.13958	0.0491644	13	13	12	40	12	44
chr7	103750001	103760000	1.40642	0.00748046	10	13	13	37	19	49
chr7	103940001	103950000	1.2894	0.0353266	5	14	14	43	13	35
chr7	105960001	105970000	1.04389	0.0159591	23	16	31	82	18	66
chr7	106290001	106300000	1.15863	0.0351421	11	11	21	42	22	38
chr7	107750001	107760000	1.17666	0.00697287	25	17	21	73	15	80
chr7	108620001	108630000	1.15481	0.0312319	10	19	15	45	21	41
chr7	110320001	110330000	1.06185	0.0281598	18	16	19	51	23	47
chr7	111040001	111050000	1.27656	0.0345115	16	9	8	36	14	40
chr7	113450001	113460000	1.2193	0.0436373	11	9	13	38	13	35
chr7	115230001	115240000	1.22588	0.0327493	12	10	14	45	12	39
chr7	115610001	115620000	1.01257	0.048744	16	14	22	50	14	56
chr7	115660001	115670000	1.27272	0.0382391	12	9	10	33	13	38
chr7	117300001	117310000	1.33789	0.0251229	13	10	8	36	14	38
chr7	118080001	118090000	1.15299	0.011377	20	19	15	57	20	59
chr7	120780001	120790000	1.59433	0.028027	6	7	7	20	15	29
chr7	123050001	123060000	1.04409	0.0309258	13	19	30	56	16	75
chr7	123850001	123860000	1.13408	0.0320164	15	13	15	47	16	43
chr7	126600001	126610000	1.79869	0.0252251	10	1	5	21	12	27
chr7	127480001	127490000	1.09318	0.0236204	18	14	20	47	23	51
chr7	131650001	131660000	1.07104	0.0258437	17	14	32	78	15	60
chr7	136340001	136350000	1.41727	0.0303114	7	14	6	32	16	31
chr7	140810001	140820000	1.14356	0.0014505	33	20	31	72	37	94
chr7	142130001	142140000	1.29913	0.0470659	11	5	13	34	10	37
chr7	145800001	145810000	1.39459	0.027344	9	11	8	41	14	27
chr7	146510001	146520000	1.37243	0.0112661	16	12	9	53	12	47
chr8	13440001	13450000	1.28316	0.0187381	12	7	21	40	16	52
chr8	14110001	14120000	1.13557	0.0452015	16	16	9	46	17	38
chr8	15450001	15460000	1.0895	0.0308729	12	16	27	45	28	50
chr8	15610001	15620000	1.08644	0.0288735	14	14	25	45	18	63
chr8	19860001	19870000	1.07758	0.036603	17	18	17	58	11	61
chr8	24260001	24270000	1.18418	0.0086754	9	25	27	61	27	64
chr8	31520001	31530000	1.09539	0.0461507	12	11	21	49	14	43
chr8	32190001	32200000	1.21249	0.0187389	12	14	17	39	19	52
chr8	33060001	33070000	1.00941	0.0432024	16	19	19	46	24	48
chr8	34150001	34160000	1.04341	0.0229215	18	15	26	61	20	55
chr8	34390001	34400000	1.19664	0.0197434	12	12	20	51	15	48
chr8	36960001	36970000	1.16199	0.0377121	11	16	14	48	11	48
chr8	43630001	43640000	1.99819	0.00489497	2	6	9	23	11	42
chr8	49360001	49370000	1.04249	0.000994209	38	32	35	107	32	108
chr8	50020001	50030000	1.93822	0.00143237	6	3	13	36	12	47
chr8	50080001	50090000	1.56803	0.015707	8	9	6	32	13	31
chr8	51030001	51040000	1.36387	0.00465174	15	13	14	44	19	58
chr8	52990001	53000000	1.2521	0.00929357	15	13	17	52	17	52
chr8	53780001	53790000	1.19921	0.00776942	17	18	19	66	24	47
chr8	55370001	55380000	1.16318	0.0349414	15	10	16	35	19	46
chr8	59030001	59040000	1.07995	0.0218861	18	30	18	50	34	65
chr8	59380001	59390000	1.11959	0.0187359	14	21	18	62	18	51
chr8	60150001	60160000	1.34889	0.0160567	15	8	11	42	15	40
chr8	62190001	62200000	1.58056	0.0181974	9	7	6	31	14	27
chr8	65110001	65120000	1.3094	0.0282489	5	16	14	49	13	37
chr8	65200001	65210000	1.83266	0.028823	7	1	6	22	9	24
chr8	65400001	65410000	1.10818	0.0290291	14	13	23	55	22	40
chr8	68680001	68690000	1.09272	0.0442623	11	24	14	40	22	53
chr8	68950001	68960000	1.07904	0.00895773	18	21	27	64	25	66
chr8	68960001	68970000	1.02973	0.0335488	15	26	17	53	24	54
chr8	69490001	69500000	1.08175	0.0442131	19	11	20	63	11	50
chr8	70010001	70020000	1.22156	0.0484578	12	11	9	33	13	38
chr8	70190001	70200000	1.18101	0.0122963	14	18	23	42	24	71
chr8	71980001	71990000	1.51205	0.0419408	5	9	6	25	9	31
chr8	72220001	72230000	1.17442	0.0270271	14	12	16	41	15	51
chr8	75720001	75730000	1.42538	0.00458514	8	15	15	46	18	50
chr8	76540001	76550000	1.19088	0.0418087	7	14	16	37	15	42
chr8	76590001	76600000	1.31794	0.0382114	18	8	6	44	13	34
chr8	77600001	77610000	1.23077	0.0404785	9	10	15	38	11	42
chr8	77800001	77810000	1.12297	0.0295217	14	12	21	52	20	40
chr8	78120001	78130000	1.71073	0.0178951	4	5	10	33	13	21
chr8	79570001	79580000	1.51627	0.0173378	8	8	9	26	15	37
chr8	81590001	81600000	1.0518	0.0100289	30	21	21	76	22	73
chr8	81700001	81710000	1.2494	0.0207301	17	19	8	42	25	46
chr8	84480001	84490000	1.77264	0.0111498	5	7	6	29	12	27
chr8	85250001	85260000	1.4582	0.0437406	11	4	7	27	10	31
chr8	90340001	90350000	1.16323	0.042755	13	13	12	47	13	37
chr8	90630001	90640000	1.46558	0.00206766	12	12	17	51	26	44
chr8	91140001	91150000	1.06221	0.0467342	14	17	15	50	14	46
chr8	92360001	92370000	1.61972	0.0498316	5	5	6	28	6	23
chr8	94150001	94160000	1.31382	0.0414388	12	6	11	39	13	28
chr8	94380001	94390000	1.01335	0.0461366	16	18	19	40	21	57
chr8	98010001	98020000	1.0104	0.0304674	25	15	20	55	24	54
chr8	98390001	98400000	1.27319	0.0227929	10	10	20	59	12	40
chr8	99520001	99530000	1.59137	0.0217241	5	10	7	23	17	30
chr8	100990001	101000000	1.07391	0.0280719	14	20	19	49	17	61
chr8	102980001	102990000	1.10323	0.0313124	9	21	20	49	19	52
chr8	104440001	104450000	1.24865	0.0214005	11	12	16	39	14	52
chr8	105820001	105830000	1.30011	0.0027126	11	18	24	61	23	61
chr8	105850001	105860000	1.17763	0.0264586	15	10	18	39	21	45
chr8	106200001	106210000	1.33222	0.043516	11	8	8	37	11	29
chr8	108360001	108370000	1.29359	0.0225156	19	7	14	49	23	32
chr8	108550001	108560000	1.04163	0.0389286	17	17	19	57	23	39
chr8	109090001	109100000	1.03833	0.0112841	18	28	25	69	25	70
chr8	109540001	109550000	1.36462	0.0101283	16	10	12	57	13	43
chr8	110540001	110550000	1.33721	0.04	9	3	20	38	13	38
chr8	110720001	110730000	1.48581	0.0193778	8	10	9	25	13	47
chr8	111950001	111960000	1.64579	0.0103197	6	5	12	31	12	37
chr8	115810001	115820000	1.90491	0.0171355	5	6	3	25	7	29
chr8	119250001	119260000	1.00656	0.0210509	23	17	25	61	25	58
chr8	120020001	120030000	1.08054	0.0486353	15	11	17	44	15	43
chr8	121270001	121280000	1.32685	0.00327963	18	10	27	56	33	55
chr8	121390001	121400000	1.38854	0.0116452	12	13	9	47	16	37
chr8	121730001	121740000	1.06213	0.0220774	17	20	20	64	20	50
chr8	122140001	122150000	1.7287	0.0130272	6	6	7	36	9	27
chr8	126780001	126790000	1.04348	0.0202905	20	16	24	55	24	57
chr8	127190001	127200000	1.24526	0.0411784	10	9	14	29	15	42
chr8	127710001	127720000	1.1157	0.0457392	10	14	17	39	17	42
chr8	127730001	127740000	1.15474	0.013965	12	19	26	62	28	46
chr8	128560001	128570000	1.031	0.00688671	23	25	30	80	24	77
chr8	129800001	129810000	1.05722	0.01164	20	21	24	62	24	65
chr8	130200001	130210000	1.15471	0.00924915	19	13	26	59	19	68
chr8	130310001	130320000	1.67764	0.0189851	4	8	7	32	12	23
chr8	130710001	130720000	1.11084	0.00542962	24	17	28	71	22	76
chr8	131950001	131960000	1.04536	0.0466733	14	14	21	40	17	56
chr8	132040001	132050000	1.42775	0.0148307	11	9	11	32	21	35
chr8	132710001	132720000	1.59012	0.00712324	13	6	9	30	15	49
chr8	134860001	134870000	1.1576	0.000487894	32	25	39	96	48	85
chr8	135100001	135110000	1.12299	0.042755	16	12	15	53	11	45
chr8	135120001	135130000	1.47311	0.0336317	10	5	8	29	9	35
chr8	138920001	138930000	1.286	0.0176473	12	14	13	36	15	57
chr8	139570001	139580000	1.04727	0.00557999	16	31	48	96	32	91
chr8	146240001	146250000	1.17425	0.0234172	18	13	13	42	18	51
chr9	7220001	7230000	1.19895	0.00123567	24	28	23	75	38	74
chr9	7380001	7390000	1.1602	0.00393481	19	16	31	69	25	70
chr9	7570001	7580000	1.17536	0.031491	8	20	15	44	16	50
chr9	7730001	7740000	1.08647	0.0338088	15	15	17	50	17	45
chr9	8140001	8150000	1.14967	0.0239716	13	16	19	63	16	42
chr9	8980001	8990000	1.57638	0.00983605	7	8	10	36	12	36
chr9	9110001	9120000	1.26692	0.00294339	16	18	22	65	29	52
chr9	10670001	10680000	1.12826	0.0318389	12	13	23	56	21	37
chr9	13710001	13720000	1.24176	0.00971235	14	16	17	47	25	48
chr9	13820001	13830000	1.4503	0.00422339	6	16	17	48	22	46
chr9	17450001	17460000	1.17666	0.0201695	21	12	15	63	16	45
chr9	19670001	19680000	1.1642	0.0364476	17	11	14	42	23	35
chr9	21550001	21560000	1.40447	0.0061797	11	11	17	44	25	40
chr9	22090001	22100000	1.1238	0.0266922	12	17	18	50	16	50
chr9	23980001	23990000	1.55162	0.00969717	9	8	9	33	15	36
chr9	26430001	26440000	1.32539	0.0433641	3	13	14	37	14	32
chr9	28300001	28310000	1.46638	0.0450979	5	7	9	23	11	30
chr9	30970001	30980000	1.53991	0.0309456	10	8	5	46	9	23
chr9	31340001	31350000	1.7067	0.0251377	4	5	8	22	13	24
chr9	34490001	34500000	1.00132	0.00778919	29	24	28	75	29	77
chr9	71310001	71320000	1.23625	0.00330668	19	16	23	73	18	66
chr9	71320001	71330000	1.10222	0.00915893	22	21	20	57	26	67
chr9	76030001	76040000	1.45967	0.0293879	6	13	7	36	17	24
chr9	77900001	77910000	1.82052	0.0447158	3	2	8	16	12	19
chr9	81090001	81100000	1.10858	0.0113902	24	19	19	55	21	76
chr9	81690001	81700000	1.31267	0.00852672	18	9	15	47	20	48
chr9	82150001	82160000	1.02305	0.0435864	18	16	19	58	13	54
chr9	85510001	85520000	1.16133	0.0189687	15	20	13	49	19	53
chr9	91800001	91810000	1.62924	0.0020371	9	10	12	53	12	46
chr9	101700001	101710000	1.02251	0.0119645	20	23	33	59	29	82
chr9	102340001	102350000	1.32036	0.00419955	11	20	17	59	24	49
chr9	102610001	102620000	1.14462	0.00756777	21	15	23	64	22	60
chr9	103330001	103340000	1.15579	0.015106	13	20	18	50	23	52
chr9	104530001	104540000	1.58589	0.00893061	13	5	8	36	14	37
chr9	104820001	104830000	1.04639	0.0115857	24	18	37	92	30	57
chr9	106740001	106750000	1.14612	0.0239943	12	16	19	43	17	57
chr9	107190001	107200000	1.21659	0.0407691	12	6	18	40	15	37
chr9	108650001	108660000	1.13431	0.0139043	12	17	36	55	30	67
chr9	109190001	109200000	1.02305	0.0447461	18	17	17	58	14	50
chr9	109820001	109830000	1.1075	0.043376	12	15	15	46	15	41
chr9	111400001	111410000	1.06177	0.00798916	24	23	26	69	21	85
chr9	111550001	111560000	1.12718	0.00251566	19	31	29	76	27	93
chr9	112470001	112480000	1.04971	0.045848	13	15	24	61	12	52
chr9	118300001	118310000	1.53779	0.0264638	5	7	11	38	7	33
chr9	118800001	118810000	1.47016	0.00998356	8	13	11	40	22	32
chr9	118920001	118930000	1.2213	0.00789679	20	19	14	67	16	61
chr9	120080001	120090000	1.76418	0.00857405	8	3	9	29	11	36
chr9	120170001	120180000	1.02079	0.0172113	27	13	33	77	22	68
chr9	120190001	120200000	1.21785	0.0339964	7	14	16	40	15	41
chr9	121370001	121380000	1.55025	0.0100583	8	7	11	35	13	37
chr9	122610001	122620000	1.17546	0.00232248	24	19	25	81	25	67
chr9	122710001	122720000	1.09005	0.0151212	29	19	16	59	21	76
chr9	122880001	122890000	1.21512	0.0292761	14	14	11	34	17	50
chr9	126430001	126440000	1.02225	0.0027026	33	29	32	83	37	91
chr10	210001	220000	1.17048	0.0257604	12	12	19	42	19	45
chr10	10260001	10270000	1.17569	0.0174317	15	15	16	50	20	45
chr10	20610001	20620000	1.13505	0.0481473	14	11	14	39	12	47
chr10	20910001	20920000	1.31241	0.0410358	6	11	13	33	18	28
chr10	22670001	22680000	1.08754	0.021292	18	16	19	50	21	54
chr10	23930001	23940000	1.28657	0.0231667	12	11	12	33	17	44
chr10	24000001	24010000	1.01864	0.0147068	17	25	29	67	22	74
chr10	24070001	24080000	1.21358	0.0278478	17	10	12	47	15	40
chr10	24450001	24460000	1.0486	0.0196138	17	18	27	60	27	52
chr10	25410001	25420000	1.22266	0.00097603	21	27	26	66	32	94
chr10	25900001	25910000	1.32041	0.00777033	14	9	19	48	20	47
chr10	44080001	44090000	1.16187	0.00178123	22	24	30	65	33	89
chr10	44650001	44660000	1.33908	0.0446666	9	8	9	29	11	34
chr10	45780001	45790000	1.46535	0.0332129	6	10	7	31	13	26
chr10	50230001	50240000	1.06792	0.00127206	32	42	35	106	29	132
chr10	52060001	52070000	1.02695	0.035747	11	26	27	63	29	48
chr10	52220001	52230000	1.44648	0.00332948	13	11	14	54	19	42
chr10	52610001	52620000	1.73605	0.0133052	5	4	10	33	11	26
chr10	52950001	52960000	1.56093	0.00568058	10	8	12	31	21	42
chr10	53910001	53920000	1.22985	0.015164	10	15	20	52	14	55
chr10	54850001	54860000	1.10773	0.0393478	13	15	15	46	16	42
chr10	56740001	56750000	1.37865	0.0279355	9	17	6	33	21	35
chr10	61070001	61080000	1.26151	0.0257762	10	8	21	37	21	41
chr10	63320001	63330000	1.08774	0.0424497	10	18	18	45	15	51
chr10	63350001	63360000	1.15947	0.0222342	12	14	20	44	21	47
chr10	64190001	64200000	1.00434	0.0457985	16	16	32	48	33	51
chr10	64210001	64220000	1.07208	0.0247516	13	29	18	56	25	59
chr10	65750001	65760000	1.68151	0.000197097	10	12	15	58	20	55
chr10	69320001	69330000	1.54983	0.0346098	9	5	6	22	11	32
chr10	71330001	71340000	1.52158	0.00636232	11	8	11	37	14	46
chr10	79210001	79220000	1.14352	0.00098159	28	34	26	105	34	80
chr10	82790001	82800000	1.45053	0.0295928	6	9	9	30	12	31
chr10	87130001	87140000	1.15249	0.0106999	19	16	19	54	24	54
chr10	87600001	87610000	1.57128	0.0114748	10	7	8	34	17	29
chr10	88120001	88130000	1.01808	0.0174472	32	25	19	68	21	90
chr10	90220001	90230000	1.55558	0.0106754	11	8	7	32	17	34
chr10	90350001	90360000	1.69061	0.0406342	5	4	6	20	11	21
chr10	92340001	92350000	1.29831	0.040604	11	6	15	47	9	35
chr10	92500001	92510000	1.14484	0.0214293	16	10	27	49	17	66
chr10	92760001	92770000	1.03822	0.00382591	28	31	27	90	29	81
chr10	92770001	92780000	1.08212	0.014692	13	21	29	62	26	58
chr10	94910001	94920000	1.07694	0.0314013	17	16	16	49	18	49
chr10	96670001	96680000	1.57682	0.0167173	9	8	6	26	16	32
chr10	96740001	96750000	1.55493	0.0234534	5	8	9	36	9	29
chr10	106580001	106590000	1.0309	0.0375857	17	13	23	54	18	49
chr10	106810001	106820000	1.04973	0.0384827	19	11	23	60	15	50
chr10	107320001	107330000	1.10603	0.0244608	22	12	19	57	24	43
chr10	109500001	109510000	1.22624	0.0284891	13	8	17	38	15	46
chr10	110480001	110490000	1.60304	0.00910058	6	10	10	28	13	48
chr10	110640001	110650000	1.40137	0.0314932	7	10	10	27	11	43
chr10	111150001	111160000	1.08689	0.0261551	18	12	24	44	24	56
chr10	113200001	113210000	1.26863	0.00366189	18	13	28	55	34	60
chr10	113220001	113230000	1.11995	0.0427739	14	13	14	46	14	41
chr10	113980001	113990000	1.03436	0.0147005	23	22	21	63	22	68
chr10	117430001	117440000	1.40182	0.0109568	5	14	17	47	14	47
chr10	117600001	117610000	1.06503	0.0487345	15	15	17	52	21	34
chr10	125080001	125090000	1.14456	0.0296548	17	13	14	42	21	43
chr10	127710001	127720000	1.08882	0.0129473	22	20	19	56	21	70
chr10	129270001	129280000	1.18833	0.00382604	20	20	20	67	23	64
chr11	4180001	4190000	1.14551	0.000658803	25	35	29	96	36	88
chr11	4460001	4470000	1.00938	0.0276444	20	26	17	65	20	60
chr11	7820001	7830000	1.14082	0.0124051	11	28	27	55	24	85
chr11	14760001	14770000	1.02466	0.0102737	30	21	25	76	31	63
chr11	15180001	15190000	1.01332	0.0154014	21	23	24	65	25	63
chr11	15750001	15760000	1.2825	0.00273591	13	20	22	63	19	71
chr11	20430001	20440000	1.14839	0.0278311	10	15	21	43	22	45
chr11	21500001	21510000	1.48738	0.0477959	6	7	7	28	7	30
chr11	23010001	23020000	1.83447	0.0056664	5	6	8	31	10	36
chr11	27290001	27300000	1.9297	0.00240967	6	6	7	36	15	28
chr11	30050001	30060000	1.4095	0.0265283	14	6	8	40	11	34
chr11	30270001	30280000	1.37826	0.0430249	12	10	6	28	21	26
chr11	30700001	30710000	1.13207	0.0350297	9	13	28	53	23	41
chr11	31640001	31650000	1.52071	0.0269389	9	7	6	33	11	27
chr11	31930001	31940000	1.09955	0.0138914	17	20	21	63	18	61
chr11	36580001	36590000	1.0662	0.0346731	18	23	12	52	18	57
chr11	37310001	37320000	1.36902	0.014319	14	12	8	41	18	38
chr11	42100001	42110000	1.36262	0.0165167	18	5	13	50	15	39
chr11	43590001	43600000	1.06357	0.0325051	22	13	19	42	21	62
chr11	44270001	44280000	1.10281	0.00550833	24	27	20	75	29	66
chr11	45630001	45640000	1.01554	0.00666192	27	22	32	81	28	74
chr11	46070001	46080000	1.04371	0.0284285	18	14	23	54	20	52
chr11	51560001	51570000	1.04062	0.0203369	15	25	23	55	23	67
chr11	55810001	55820000	1.64389	0.00428799	10	7	9	38	14	39
chr11	56220001	56230000	1.30201	0.0431121	3	13	17	40	11	42
chr11	56630001	56640000	1.66139	0.0478982	7	5	3	20	9	24
chr11	56700001	56710000	1.19122	0.0215234	21	9	16	53	21	41
chr11	58190001	58200000	2.03263	0.0202905	6	3	3	29	11	13
chr11	59770001	59780000	1.05448	0.0466299	16	12	19	47	14	50
chr11	60180001	60190000	1.35406	0.0110174	9	21	10	53	19	43
chr11	78660001	78670000	1.10663	0.00330442	27	29	25	78	40	70
chr11	79270001	79280000	1.16804	0.0357007	14	12	15	53	11	43
chr11	79670001	79680000	1.28235	0.00722861	17	13	17	49	27	46
chr11	80900001	80910000	1.14726	0.0348455	22	9	14	40	18	53
chr11	81710001	81720000	1.14884	0.00620655	17	17	28	67	21	67
chr11	87990001	88000000	1.03045	0.0350738	15	19	21	44	23	56
chr11	91690001	91700000	1.2873	0.0260092	14	8	13	32	19	41
chr11	93360001	93370000	1.24692	0.0029879	28	18	15	70	29	61
chr11	93740001	93750000	1.10757	0.0308512	12	17	20	54	22	39
chr11	93930001	93940000	1.03645	0.0134851	23	19	25	62	22	71
chr11	93950001	93960000	1.39016	0.0242911	9	10	9	36	12	35
chr11	95440001	95450000	1.02991	0.017466	31	20	21	66	34	58
chr11	96180001	96190000	1.3191	0.0232918	18	8	9	38	19	38
chr11	96440001	96450000	1.39702	0.00524629	13	12	15	61	18	39
chr11	99670001	99680000	1.24686	0.04331	8	13	13	30	12	50
chr11	101700001	101710000	1.37764	0.0432103	10	4	13	34	8	39
chr11	103620001	103630000	1.21485	0.0485728	10	10	12	34	13	36
chr11	103830001	103840000	1.121	0.00631517	19	21	31	55	30	84
chr11	106110001	106120000	1.30438	0.0339451	10	7	14	33	12	41
chr11	110590001	110600000	1.12322	0.0404232	12	12	20	47	21	35
chr11	111200001	111210000	1.03528	0.0084933	27	24	25	85	23	70
chr11	111210001	111220000	1.14751	0.03772	19	18	10	52	25	35
chr11	114380001	114390000	1.37727	0.00162563	17	11	21	66	19	59
chr11	115800001	115810000	1.0224	0.0308128	17	30	18	69	27	50
chr11	123850001	123860000	1.08536	0.0235701	22	15	18	63	15	57
chr11	124780001	124790000	1.2619	0.0272994	15	12	9	47	13	39
chr11	125690001	125700000	1.18612	0.0416328	10	12	14	35	15	41
chr11	127530001	127540000	1.01343	0.0289202	18	15	37	78	25	52
chr11	129400001	129410000	1.04832	0.0359025	18	18	15	51	18	50
chr11	133200001	133210000	1.02396	0.0110737	22	25	26	79	25	63
chr12	5520001	5530000	1.13043	0.0484346	12	13	17	38	24	34
chr12	11000001	11010000	1.12377	0.0092694	26	18	19	68	18	73
chr12	11060001	11070000	1.20425	0.012029	17	12	19	50	17	58
chr12	16320001	16330000	1.05263	0.0370465	19	15	18	40	21	58
chr12	18160001	18170000	1.88061	0.0146582	3	6	6	21	13	25
chr12	19900001	19910000	1.06127	0.0271815	21	13	20	55	18	54
chr12	19990001	20000000	1.01615	0.00455528	26	32	31	76	35	88
chr12	22950001	22960000	1.08733	0.0246635	17	17	18	46	19	59
chr12	23420001	23430000	1.58866	0.0423583	5	3	10	26	9	25
chr12	28250001	28260000	1.29207	0.0469042	12	8	9	28	17	31
chr12	29060001	29070000	1.4581	0.0418243	4	9	9	28	10	30
chr12	33710001	33720000	1.48508	0.0327363	6	8	8	26	12	30
chr12	38120001	38130000	1.05024	0.00500024	23	29	30	71	36	78
chr12	39670001	39680000	1.08142	0.0437781	16	16	15	51	22	35
chr12	40120001	40130000	1.12773	0.0340061	12	18	14	42	17	49
chr12	42230001	42240000	1.09125	0.0332973	11	17	20	50	18	46
chr12	55920001	55930000	1.16716	0.044475	9	15	14	44	17	33
chr12	59650001	59660000	1.56051	0.0310081	8	6	6	30	8	30
chr12	60350001	60360000	1.46993	0.0135463	8	11	9	37	15	34
chr12	61010001	61020000	1.30838	0.0367059	6	12	13	31	18	33
chr12	63760001	63770000	1.00182	0.0316845	22	18	19	60	20	53
chr12	66860001	66870000	1.01312	0.036905	12	20	26	50	22	57
chr12	67080001	67090000	1.11634	0.0100701	17	19	24	62	19	67
chr12	67960001	67970000	1.05875	0.0449983	11	18	20	47	14	56
chr12	68470001	68480000	1.16079	0.0389286	13	10	16	39	14	45
chr12	75990001	76000000	1.13573	0.0443926	12	18	11	37	18	45
chr12	76040001	76050000	1.39821	0.00867718	10	10	15	46	17	39
chr12	77990001	78000000	1.7938	0.0246171	5	6	4	18	11	28
chr12	81210001	81220000	1.08569	0.0176275	18	17	23	53	18	69
chr12	81500001	81510000	1.21443	0.0182899	12	11	20	45	17	49
chr12	82140001	82150000	1.49445	0.0397522	9	5	7	31	8	29
chr12	82150001	82160000	1.07599	0.045554	15	13	19	59	14	40
chr12	85870001	85880000	1.40023	0.0443425	8	10	7	26	18	25
chr12	85990001	86000000	1.25673	0.00765167	29	13	12	65	22	59
chr12	86420001	86430000	1.36959	0.0374208	9	8	9	28	12	35
chr12	87930001	87940000	1.6287	0.00819557	8	9	7	37	11	37
chr12	92590001	92600000	1.17498	0.0186772	17	13	16	43	21	50
chr12	97610001	97620000	1.0651	0.0258427	15	21	19	62	19	49
chr12	97750001	97760000	1.14196	0.04473	14	10	15	36	15	45
chr12	98690001	98700000	1.09636	0.0236044	18	13	22	62	16	51
chr12	99670001	99680000	1.02315	0.0340844	20	16	19	47	21	56
chr12	103720001	103730000	1.37504	0.0014359	12	17	20	59	22	61
chr12	114930001	114940000	1.16178	0.0195963	19	12	17	57	20	42
chr12	116080001	116090000	1.1225	0.00849434	15	23	24	65	21	67
chr12	116160001	116170000	1.13353	0.0177434	15	25	17	49	30	55
chr12	125870001	125880000	1.07698	0.00226	26	23	37	93	30	80
chr13	32010001	32020000	1.16656	0.000286598	36	28	31	88	42	105
chr13	37910001	37920000	1.22465	0.0105569	18	16	14	61	16	52
chr13	40490001	40500000	1.48508	0.00728047	7	14	13	33	23	45
chr13	43120001	43130000	1.22769	0.00895756	23	12	15	54	22	54
chr13	44240001	44250000	1.01608	0.0175909	23	22	22	70	25	56
chr13	47760001	47770000	1.20274	0.00601813	19	15	21	52	25	62
chr13	48000001	48010000	1.15259	0.0480937	10	10	18	44	13	38
chr13	48300001	48310000	1.01431	0.0220533	20	19	25	70	19	58
chr13	49010001	49020000	1.19321	0.0243027	15	11	15	43	16	46
chr13	51220001	51230000	1.27129	0.00593713	14	17	20	44	28	60
chr13	53680001	53690000	1.04952	0.0265149	15	18	24	58	16	61
chr13	53800001	53810000	1.19938	0.0106226	18	16	17	44	22	64
chr13	54140001	54150000	1.32143	0.0175858	11	11	13	48	15	35
chr13	55040001	55050000	1.09921	0.0424565	12	15	17	50	13	45
chr13	59460001	59470000	1.395	0.0262305	9	7	12	39	14	28
chr13	59860001	59870000	1.11103	0.0348368	13	19	15	49	13	56
chr13	61450001	61460000	1.23457	0.0150495	10	15	19	56	16	45
chr13	61510001	61520000	1.31458	0.0122684	10	13	16	46	21	38
chr13	64230001	64240000	1.84761	0.00495538	6	6	7	37	10	31
chr13	64730001	64740000	1.44604	0.0375714	6	13	5	31	13	29
chr13	68500001	68510000	1.15215	0.0390965	11	19	13	34	20	51
chr13	68690001	68700000	1.93209	0.00969717	4	4	7	26	12	24
chr13	69400001	69410000	1.49782	0.0297141	4	10	9	27	11	35
chr13	69830001	69840000	1.46876	0.00581718	12	9	12	40	16	46
chr13	70010001	70020000	1.40073	0.0273592	8	9	10	31	16	30
chr13	70160001	70170000	1.69577	0.00806162	10	4	8	33	13	33
chr13	71790001	71800000	1.10584	0.0353007	16	13	16	42	16	51
chr13	71910001	71920000	1.48659	0.0345197	5	12	7	39	14	21
chr13	77790001	77800000	1.46317	0.00301463	13	15	10	50	16	54
chr13	79880001	79890000	1.25774	0.0100289	15	17	13	57	19	45
chr13	80360001	80370000	1.00003	0.0397826	13	29	20	54	25	58
chr13	81700001	81710000	1.7957	0.0225306	4	7	4	24	10	24
chr13	82010001	82020000	1.62802	0.0377675	7	6	4	21	12	24
chr13	82640001	82650000	1.12941	0.0474398	12	16	12	47	16	35
chr13	82950001	82960000	1.00816	0.0486852	17	16	18	50	15	52
chr13	84930001	84940000	1.09374	0.0341823	13	12	25	46	16	58
chr13	87290001	87300000	1.21767	0.0446524	11	13	12	49	17	26
chr13	87740001	87750000	1.37806	0.00929357	10	15	11	42	18	44
chr13	87780001	87790000	1.27037	0.0342271	7	14	12	40	13	37
chr13	87980001	87990000	1.00076	0.0451008	15	18	20	48	18	53
chr13	88040001	88050000	1.39131	0.0498197	7	5	12	23	13	32
chr13	88190001	88200000	1.14178	0.0174915	16	24	13	54	21	57
chr13	88810001	88820000	1.62746	0.0103286	8	4	13	43	9	37
chr13	90750001	90760000	1.22297	0.0429517	10	9	15	33	18	34
chr13	90890001	90900000	1.5136	0.020052	7	7	10	30	15	29
chr13	91640001	91650000	1.13713	0.0207585	20	13	16	46	21	52
chr13	94060001	94070000	1.12616	0.0111478	14	21	23	61	24	55
chr13	97330001	97340000	1.14756	0.042849	10	11	21	35	21	43
chr13	101540001	101550000	1.13899	0.0285362	13	19	18	43	29	43
chr13	103390001	103400000	1.12642	0.0413072	19	13	12	39	23	41
chr13	104030001	104040000	1.2084	0.0453276	8	12	14	37	12	40
chr14	19970001	19980000	1.01226	0.0343607	40	15	17	66	27	69
chr14	20230001	20240000	1.69865	0.00963003	6	8	10	55	8	29
chr14	20380001	20390000	1.49387	0.0477556	9	9	6	53	6	23
chr14	20620001	20630000	2.03647	0.00419955	4	6	5	30	12	26
chr14	21030001	21040000	1.42996	0.00316074	11	11	20	54	25	42
chr14	25200001	25210000	1.0087	0.0384181	18	13	25	50	21	53
chr14	26380001	26390000	1.1204	0.0112623	22	14	24	70	23	52
chr14	27400001	27410000	1.43673	0.0336096	3	12	12	44	10	30
chr14	27530001	27540000	1.59305	0.0437808	5	4	10	17	16	25
chr14	28680001	28690000	1.62121	0.031152	8	9	2	25	11	30
chr14	29970001	29980000	1.08172	0.0173526	24	19	18	56	30	53
chr14	33670001	33680000	1.2093	0.025537	16	9	15	42	15	47
chr14	36190001	36200000	1.09375	0.00584349	20	30	22	74	27	72
chr14	36670001	36680000	1.08705	0.0453413	15	12	16	43	16	43
chr14	36720001	36730000	1.25425	0.00768386	15	15	18	54	25	45
chr14	38930001	38940000	1.40793	0.010346	8	7	22	43	19	44
chr14	40540001	40550000	1.71054	0.021883	6	5	6	24	10	28
chr14	42790001	42800000	1.12751	0.024506	16	16	16	44	23	47
chr14	42920001	42930000	1.38306	0.036044	10	6	10	33	10	34
chr14	44500001	44510000	1.81932	0.00218204	7	3	14	38	16	38
chr14	44510001	44520000	2.00227	0.00162219	3	5	12	47	12	31
chr14	44600001	44610000	1.12899	0.0405716	14	11	16	38	17	44
chr14	45030001	45040000	1.14381	0.0436833	11	12	20	45	23	32
chr14	45080001	45090000	1.60625	0.0411827	5	6	6	28	9	21
chr14	46440001	46450000	1.15364	0.0390137	14	11	18	49	22	31
chr14	47940001	47950000	1.03762	0.0318303	22	12	22	59	20	49
chr14	47980001	47990000	1.47437	0.0267105	10	6	9	23	14	39
chr14	48120001	48130000	1.13493	0.035255	13	16	14	52	14	42
chr14	49250001	49260000	1.45741	0.0348688	8	6	9	34	9	29
chr14	54000001	54010000	1.00085	0.00688671	27	32	27	74	32	86
chr14	54710001	54720000	1.00852	0.0227189	34	16	24	87	22	61
chr14	62570001	62580000	1.19415	0.0486364	6	12	18	39	16	35
chr14	62640001	62650000	1.27323	0.0351124	4	17	16	37	20	39
chr14	66430001	66440000	1.13937	0.00358908	22	24	24	71	33	64
chr14	66520001	66530000	1.31883	0.0150308	10	19	10	41	16	54
chr14	66610001	66620000	1.18955	0.00754808	25	14	17	57	25	59
chr14	66940001	66950000	1.71033	0.0130985	4	9	7	37	12	24
chr14	72400001	72410000	1.04426	0.0338454	11	18	27	58	19	52
chr14	79300001	79310000	1.09172	0.045998	11	13	20	49	14	43
chr14	80000001	80010000	1.12883	0.0150146	18	16	21	59	15	65
chr14	80010001	80020000	1.32946	0.00700373	17	16	10	46	19	57
chr14	80110001	80120000	1.34612	0.0258981	11	11	11	33	10	55
chr14	80440001	80450000	1.32815	0.0360641	4	10	18	33	17	36
chr14	80790001	80800000	1.2659	0.0114154	12	12	21	45	25	45
chr14	82400001	82410000	1.19595	0.0344506	14	9	16	45	11	47
chr14	82720001	82730000	1.41686	0.0153265	6	12	14	33	20	38
chr14	83330001	83340000	1.05162	0.0396136	14	19	18	51	23	41
chr14	84690001	84700000	1.22263	0.0335008	15	10	13	36	12	54
chr14	85130001	85140000	1.37581	0.00667194	12	16	11	42	19	52
chr14	85780001	85790000	1.18818	0.0382114	8	12	18	42	14	41
chr14	86740001	86750000	1.55987	0.0105105	11	7	8	30	17	36
chr14	97030001	97040000	1.10852	0.0274188	19	16	14	57	17	46
chr14	97800001	97810000	1.08992	0.0297028	16	17	16	55	17	46
chr14	98140001	98150000	1.03591	0.0271581	17	22	18	56	21	54
chr14	107130001	107140000	1.22561	0.0169517	12	13	18	44	15	55
chr15	24330001	24340000	1.15613	0.019582	13	14	22	55	22	42
chr15	26740001	26750000	1.54483	0.0301507	5	9	7	33	8	30
chr15	34960001	34970000	1.03311	0.00347348	31	27	35	109	29	78
chr15	35030001	35040000	1.01817	0.00360759	30	25	36	78	34	92
chr15	35870001	35880000	1.36441	0.0397055	8	9	9	26	13	35
chr15	35950001	35960000	1.17607	0.0202341	13	11	24	50	15	58
chr15	37570001	37580000	1.16706	0.0453219	13	17	10	31	20	47
chr15	37640001	37650000	1.10349	0.0330692	14	13	23	50	25	39
chr15	38230001	38240000	1.45749	0.0205986	6	8	14	45	10	33
chr15	39230001	39240000	1.28242	0.0297268	14	9	12	44	9	47
chr15	43990001	44000000	1.0049	0.0397826	11	26	23	59	21	55
chr15	47130001	47140000	1.83199	0.0212453	2	7	7	32	5	31
chr15	47990001	48000000	1.16542	0.0386126	10	10	21	43	13	48
chr15	50140001	50150000	1.77777	0.00539262	10	6	6	45	14	25
chr15	50160001	50170000	1.21735	0.00994091	18	13	18	46	24	54
chr15	50220001	50230000	1.47122	0.0215765	9	6	11	37	9	37
chr15	53310001	53320000	1.81605	0.00541629	6	4	10	31	11	37
chr15	53820001	53830000	1.23269	0.01103	11	16	23	44	27	54
chr15	54480001	54490000	1.24391	0.0401781	12	12	9	31	15	41
chr15	55360001	55370000	1.17345	0.0407733	19	7	14	41	14	47
chr15	57980001	57990000	1.20731	0.0225776	11	10	26	41	18	61
chr15	74200001	74210000	1.03637	0.00647278	27	29	25	77	35	70
chr15	79950001	79960000	1.29358	0.00466693	16	16	16	60	23	47
chr15	80550001	80560000	1.27716	0.000193192	22	20	37	84	36	90
chr15	84850001	84860000	1.26489	0.0297232	11	15	9	44	16	34
chr15	86640001	86650000	1.07442	0.0328246	15	13	23	57	19	43
chr15	87540001	87550000	1.415	0.0455546	6	9	8	23	13	31
chr15	92740001	92750000	1.42107	0.00843027	13	11	10	49	15	39
chr15	95340001	95350000	1.07374	0.0306069	15	18	21	40	21	65
chr15	97470001	97480000	1.61441	0.0103778	7	8	9	27	13	42
chr15	97560001	97570000	1.1116	0.0407843	17	12	14	44	19	39
chr15	98030001	98040000	1.26557	0.0242253	15	4	24	43	18	52
chr16	20710001	20720000	1.10808	0.0077569	15	27	27	60	30	73
chr16	55810001	55820000	1.31994	0.00106189	16	30	18	85	22	79
chr16	55950001	55960000	1.46475	0.0163835	11	11	7	42	18	27
chr16	60300001	60310000	1.0943	0.0121878	20	22	20	61	29	54
chr16	62200001	62210000	1.54627	0.0116106	7	8	11	29	14	41
chr16	72200001	72210000	1.12931	0.00153766	29	26	30	74	42	84
chr17	21500001	21510000	1.8091	0.00360926	10	4	8	44	11	33
chr17	28380001	28390000	1.04624	0.0420168	17	17	15	44	20	48
chr17	29550001	29560000	1.06388	0.0382312	16	14	18	43	19	49
chr17	32210001	32220000	1.06178	0.0307359	17	13	26	50	16	67
chr17	49520001	49530000	1.00331	0.0491516	15	17	21	42	18	59
chr17	50210001	50220000	1.04755	0.0459519	17	10	22	44	18	50
chr17	50240001	50250000	1.30324	0.0410846	9	14	7	30	14	39
chr17	52000001	52010000	1.33319	0.0312637	19	5	11	29	18	49
chr17	52740001	52750000	1.16772	0.0487339	7	18	13	43	15	38
chr17	54200001	54210000	1.02905	0.00212422	27	30	45	84	39	106
chr17	54410001	54420000	1.31507	0.0475127	8	5	16	28	13	38
chr18	1860001	1870000	1.16311	0.0297965	11	15	16	39	18	47
chr18	2140001	2150000	1.22673	0.0424267	17	7	12	44	10	44
chr18	20250001	20260000	1.51545	0.0250212	7	8	9	21	14	40
chr18	22250001	22260000	1.1783	0.00552345	17	22	21	56	29	63
chr18	22270001	22280000	1.16522	0.00444874	25	21	18	75	22	67
chr18	22720001	22730000	1.11545	0.0235565	14	12	27	57	16	57
chr18	25280001	25290000	1.27785	0.00890671	23	13	12	45	25	57
chr18	27520001	27530000	1.27656	0.0499534	10	9	10	28	17	30
chr18	30610001	30620000	1.16556	0.037821	14	13	12	41	13	46
chr18	33450001	33460000	1.3587	0.0236453	11	10	9	39	14	33
chr18	35210001	35220000	1.13626	0.000937558	25	30	36	89	27	114
chr18	35490001	35500000	1.20784	0.0436373	11	9	14	40	13	35
chr18	36380001	36390000	1.21253	0.0496396	12	7	14	40	12	34
chr18	36430001	36440000	1.17155	0.0274039	14	13	15	41	15	51
chr18	37610001	37620000	1.16172	0.0231823	12	12	22	44	18	52
chr18	39370001	39380000	1.26374	0.00889448	14	25	12	50	27	57
chr18	39420001	39430000	1.07522	0.0227652	15	17	23	48	23	56
chr18	41040001	41050000	2.03082	0.0148959	6	2	5	16	15	23
chr18	41470001	41480000	1.43928	0.0232089	4	9	15	36	12	37
chr18	42030001	42040000	1.32302	0.00799695	13	16	17	51	30	39
chr18	52770001	52780000	1.07725	0.010557	23	21	27	60	37	61
chr18	52820001	52830000	1.06349	0.0256186	16	22	17	56	18	57
chr18	62630001	62640000	1.86178	0.00479873	8	5	6	30	10	39
chr18	63590001	63600000	1.0614	0.0464273	18	15	15	45	13	58
chr18	65240001	65250000	1.12306	0.0212339	20	15	16	52	24	45
chr18	65250001	65260000	1.22309	0.0249462	14	9	18	54	12	44
chr18	65600001	65610000	1.36867	0.0467575	11	5	9	34	10	29
chr18	67220001	67230000	1.07212	0.0447182	12	15	19	39	18	50
chr18	71620001	71630000	1.04606	0.00467647	22	37	36	72	36	110
chr18	76740001	76750000	1.36277	0.00888359	13	10	15	39	22	44
chr19	9050001	9060000	1.29001	0.000141715	25	22	29	81	33	93
chr19	27770001	27780000	1.05763	0.0466382	13	15	20	43	14	57
chr19	29190001	29200000	1.11379	0.0433213	19	9	18	52	11	53
chr19	40230001	40240000	1.25034	0.00819923	15	17	15	59	19	48
chr19	43260001	43270000	1.33108	0.0237692	9	18	8	41	20	35
chr20	4470001	4480000	1.22582	0.00631833	17	18	24	55	17	88
chr20	6600001	6610000	1.28415	0.0486697	12	8	9	31	10	40
chr20	7170001	7180000	1.18063	0.00958437	20	14	19	64	20	51
chr20	7340001	7350000	1.0882	0.0199447	19	16	19	55	18	57
chr20	7430001	7440000	1.75701	0.0209148	5	5	6	24	10	26
chr20	7830001	7840000	1.0041	0.0192412	30	21	20	63	30	63
chr20	8920001	8930000	1.6651	0.0015866	14	9	10	32	23	58
chr20	9880001	9890000	1.42673	0.00881763	11	9	13	41	18	38
chr20	10870001	10880000	1.11049	0.00856535	24	19	21	56	29	66
chr20	11630001	11640000	1.36281	0.024447	7	10	13	33	16	35
chr20	12590001	12600000	1.11286	0.0253331	20	15	14	50	20	48
chr20	12900001	12910000	1.05363	0.0221799	28	16	17	60	20	64
chr20	15860001	15870000	1.25041	0.00552871	17	14	20	52	19	66
chr20	16080001	16090000	1.00445	0.0472311	16	16	22	62	16	45
chr20	16400001	16410000	1.50534	0.00664723	11	13	7	40	16	43
chr20	17120001	17130000	1.16672	0.0373058	10	12	19	36	15	52
chr20	17210001	17220000	1.46127	0.0480121	12	2	9	36	9	27
chr20	18830001	18840000	1.38545	0.0265678	9	9	10	38	10	36
chr20	18880001	18890000	1.09354	0.00108096	28	24	46	87	37	107
chr20	20200001	20210000	1.02651	0.0104157	32	21	23	78	23	76
chr20	21570001	21580000	1.12506	0.0477442	13	13	15	38	22	35
chr20	22280001	22290000	1.06128	0.00685617	22	28	34	89	39	60
chr20	22370001	22380000	1.10989	0.0153044	21	21	15	65	20	55
chr20	38980001	38990000	1.1276	0.0279404	17	10	21	54	20	41
chr20	40580001	40590000	1.23138	0.0199289	13	11	16	48	16	41
chr20	51560001	51570000	1.44408	0.0337896	11	4	14	41	20	20
chr20	54710001	54720000	1.03738	0.0353803	15	18	21	43	23	55
chr21	17090001	17100000	1.18104	0.00038197	29	24	33	102	31	87
chr21	17600001	17610000	1.50093	0.0176258	12	11	5	26	16	46
chr21	22370001	22380000	1.11375	0.0482389	12	17	13	36	15	52
chr21	22740001	22750000	1.43537	0.0332029	8	7	9	34	12	26
chr21	23460001	23470000	1.04996	0.0491462	18	13	24	55	10	70
chr21	23900001	23910000	1.1141	0.030762	15	19	14	40	22	52
chr21	24110001	24120000	1.11441	0.0246137	16	15	18	44	18	57
chr21	24630001	24640000	1.13615	0.0469253	11	14	14	35	15	46
chr21	24780001	24790000	1.75522	0.00153385	10	7	9	41	13	46
chr21	29330001	29340000	1.263	0.010993	21	15	13	51	30	43
chr21	29970001	29980000	1.36477	0.00257535	15	14	17	55	25	49
chr21	33070001	33080000	1.37632	0.0127082	14	10	13	49	23	30
chr21	34370001	34380000	1.04922	0.0072283	27	22	27	79	21	81
chr21	36540001	36550000	1.28346	0.00143235	17	20	21	70	26	61
chr21	42630001	42640000	1.0445	0.00552345	30	21	30	90	26	73
chr22	34880001	34890000	1.174	0.00565133	22	17	20	58	22	70
chr22	40240001	40250000	1.05717	0.0257794	17	18	21	62	22	45
chr1	130001	140000	-1.12177	0.000560951	574	468	512	333	88	436
chr1	660001	670000	-1.11661	0.00498767	223	178	191	134	29	168
chr1	890001	900000	-1.16619	5.32854e-15	501	425	657	284	117	386
chr1	900001	910000	-1.0584	1.7585e-10	460	378	573	281	94	401
chr1	910001	920000	-1.30542	1.60758e-05	504	415	602	234	87	390
chr1	970001	980000	-1.06093	0.000397151	389	290	447	195	89	320
chr1	980001	990000	-1.31104	4.11478e-06	832	696	976	396	141	636
chr1	1010001	1020000	-1.38187	0.000986705	479	361	517	215	59	353
chr1	1020001	1030000	-1.38174	4.52007e-05	792	686	981	374	121	619
chr1	1060001	1070000	-1.13764	7.4559e-18	715	607	906	442	154	550
chr1	1070001	1080000	-1.13515	0.00522241	580	403	636	281	98	484
chr1	1080001	1090000	-1.11091	4.48071e-05	597	471	719	363	108	497
chr1	1090001	1100000	-1.13806	4.41631e-15	579	471	732	331	132	443
chr1	1100001	1110000	-1.07905	0.00170134	474	396	653	271	105	448
chr1	1110001	1120000	-1.29394	2.79418e-19	556	455	727	312	107	381
chr1	1130001	1140000	-1.00915	7.00528e-08	337	250	442	214	72	295
chr1	1150001	1160000	-1.20644	4.75077e-16	757	560	931	414	147	541
chr1	1160001	1170000	-1.02337	3.00373e-11	582	463	752	365	135	498
chr1	1170001	1180000	-1.39093	0.00273742	519	423	723	210	88	435
chr1	1220001	1230000	-1.75882	0.00126118	389	382	576	136	44	299
chr1	1230001	1240000	-1.4107	4.22457e-05	497	432	631	224	77	386
chr1	1240001	1250000	-1.45414	0.000673714	417	325	500	167	56	313
chr1	1260001	1270000	-1.2432	0.000231228	456	415	704	287	84	407
chr1	1270001	1280000	-1.59883	1.4891e-07	609	557	794	253	86	417
chr1	1470001	1480000	-1.35428	5.96928e-07	604	531	781	297	105	464
chr1	1560001	1570000	-1.82692	7.01847e-05	290	246	424	88	36	189
chr1	1590001	1600000	-1.01426	1.3375e-06	166	158	180	99	40	143
chr1	1850001	1860000	-1.04685	0.00248078	497	439	646	298	103	492
chr1	1910001	1920000	-1.1526	0.000901449	802	599	886	395	142	662
chr1	2230001	2240000	-1.0084	2.12968e-10	438	372	607	284	116	385
chr1	2240001	2250000	-1.1428	0.0292522	331	262	429	161	58	326
chr1	2250001	2260000	-1.93246	0.000239903	604	459	787	178	51	358
chr1	2260001	2270000	-1.2311	0.00359827	806	628	933	391	124	686
chr1	2380001	2390000	-1.08336	0.00083068	438	438	601	287	90	442
chr1	2420001	2430000	-1.03002	0.000749107	594	507	792	382	125	571
chr1	2430001	2440000	-1.3724	0.000643666	520	436	590	205	83	408
chr1	2440001	2450000	-1.15119	2.12178e-05	787	641	1021	441	161	661
chr1	2480001	2490000	-1.23044	3.73094e-08	148	124	195	101	22	106
chr1	2530001	2540000	-1.13177	2.70984e-05	445	389	551	249	91	387
chr1	3320001	3330000	-1.0802	9.86141e-16	796	633	996	490	182	617
chr1	3410001	3420000	-1.35702	2.31464e-05	483	432	635	230	83	389
chr1	10690001	10700000	-1.22711	0.00167382	481	417	605	236	85	431
chr1	10710001	10720000	-1.16957	5.21631e-15	632	515	776	347	130	491
chr1	16270001	16280000	-1.16931	1.5316e-12	413	310	494	226	80	307
chr1	21370001	21380000	-1.10849	0.00016651	107	80	134	60	16	96
chr1	27870001	27880000	-1.2931	1.70031e-16	561	435	724	282	112	392
chr1	43350001	43360000	-1.14737	8.19279e-16	402	341	448	243	82	284
chr1	48650001	48660000	-1.16139	3.03791e-05	94	74	107	55	16	69
chr1	48840001	48850000	-1.07214	0.00159216	72	54	91	35	19	60
chr1	64660001	64670000	-1.00107	9.17821e-08	222	162	258	151	48	163
chr1	64880001	64890000	-1.06367	6.64152e-06	129	99	130	76	31	84
chr1	72170001	72180000	-1.0773	0.00483403	54	46	63	32	10	46
chr1	86680001	86690000	-1.17159	0.0120547	30	51	68	22	9	44
chr1	89130001	89140000	-1.0619	1.34196e-05	117	98	152	71	28	98
chr1	94250001	94260000	-1.07147	0.0126773	40	51	52	42	7	30
chr1	98300001	98310000	-1.06538	0.00898376	49	40	59	25	14	39
chr1	104760001	104770000	-1.29005	0.00173828	43	41	63	26	6	37
chr1	112730001	112740000	-1.03419	0.00578924	67	61	51	35	15	49
chr1	145150001	145160000	-1.58291	0.000109415	45	44	46	20	7	24
chr1	145180001	145190000	-1.03946	0.043376	44	29	33	29	9	20
chr1	147420001	147430000	-1.39874	2.94648e-05	71	54	86	31	10	50
chr1	147830001	147840000	-1.12314	0.00407823	71	35	74	46	12	35
chr1	148920001	148930000	-1.16324	0.03302	43	33	44	13	6	43
chr1	149060001	149070000	-1.70977	0.003181	76	64	86	20	8	53
chr1	149130001	149140000	-1.26408	6.5168e-06	97	105	126	41	28	81
chr1	149190001	149200000	-1.16087	0.0440875	167	138	215	59	52	129
chr1	149350001	149360000	-1.4298	0.0261392	21	17	33	10	5	14
chr1	160630001	160640000	-1.00787	0.00784188	66	45	57	39	12	44
chr1	160770001	160780000	-1.14118	1.4891e-07	154	112	185	91	36	100
chr1	164240001	164250000	-1.13862	0.0231823	44	31	32	27	8	20
chr1	164320001	164330000	-1.06237	1.539e-05	109	98	121	66	27	83
chr1	172540001	172550000	-1.0038	0.000531327	82	83	101	50	22	77
chr1	172680001	172690000	-1.00191	0.00168618	69	61	83	52	22	43
chr1	187580001	187590000	-1.05594	8.03486e-05	111	86	123	69	18	90
chr1	187850001	187860000	-1.12599	0.000589014	59	70	75	40	14	52
chr1	192260001	192270000	-1.04462	0.000139522	84	109	128	70	19	90
chr1	196900001	196910000	-1.49986	4.47794e-05	46	51	64	27	9	28
chr1	198630001	198640000	-1.13047	0.00579943	54	41	49	28	9	38
chr1	225460001	225470000	-1.0722	8.53363e-07	133	135	151	86	32	107
chr1	228460001	228470000	-1.08433	1.66279e-05	676	567	820	437	126	579
chr1	228500001	228510000	-1.07495	0.000628348	535	460	650	297	111	495
chr1	248830001	248840000	-1.35989	0.000339971	41	60	74	26	10	41
chr2	4190001	4200000	-1.04652	0.00030167	96	67	121	62	18	76
chr2	10150001	10160000	-1.22312	2.2555e-15	458	436	613	301	81	365
chr2	11420001	11430000	-1.10387	0.000342054	67	61	100	49	18	51
chr2	25750001	25760000	-1.21505	3.3597e-12	291	227	354	154	59	209
chr2	27300001	27310000	-1.31763	0.00109077	178	137	301	110	32	141
chr2	41970001	41980000	-1.03217	0.00175993	69	84	65	48	18	55
chr2	51370001	51380000	-1.05738	6.79535e-05	89	82	109	61	22	68
chr2	52790001	52800000	-1.19164	0.00123514	282	173	314	145	43	204
chr2	60680001	60690000	-1.18648	6.39436e-13	266	231	345	167	56	194
chr2	68750001	68760000	-1.07593	1.46082e-06	135	137	198	89	34	128
chr2	81340001	81350000	-1.04098	0.029645	38	33	48	20	9	36
chr2	83990001	84000000	-1.00918	0.00216091	59	72	89	56	12	58
chr2	86770001	86780000	-1.07911	9.12382e-09	167	163	212	126	42	120
chr2	91840001	91850000	-1.41066	0.00142188	38	31	64	28	7	21
chr2	92200001	92210000	-1.01511	0.000193069	84	101	148	64	33	83
chr2	96460001	96470000	-1.37629	0.00561424	41	26	39	22	4	21
chr2	96690001	96700000	-1.20378	0.0428209	26	20	35	18	4	18
chr2	111060001	111070000	-1.93892	0.0093498	21	16	28	5	0	15
chr2	113190001	113200000	-1.0992	0.00780075	38	43	60	30	10	34
chr2	114470001	114480000	-1.10926	0.00101925	66	51	75	46	12	43
chr2	132510001	132520000	-1.32339	6.04559e-06	422	327	509	195	72	310
chr2	132580001	132590000	-2.09861	0.000214195	87	63	87	18	5	43
chr2	132910001	132920000	-1.24076	0.0401584	17	29	44	24	5	14
chr2	133010001	133020000	-1.14341	2.23574e-05	1064	835	1427	619	220	882
chr2	133110001	133120000	-1.22002	0.00548993	38	32	65	24	10	30
chr2	152040001	152050000	-1.01813	2.77169e-05	110	100	142	70	35	86
chr2	154070001	154080000	-1.12482	0.00250552	57	63	91	28	16	64
chr2	154130001	154140000	-1.06672	0.014334	44	43	79	22	16	48
chr2	161290001	161300000	-1.30946	7.68819e-10	154	130	224	102	29	100
chr2	163090001	163100000	-1.13862	0.000145786	77	65	104	47	16	63
chr2	167070001	167080000	-1.17752	0.000315599	66	75	103	51	9	66
chr2	180530001	180540000	-1.01292	0.000324584	83	86	117	68	16	79
chr2	188230001	188240000	-1.04193	1.39073e-05	130	119	121	75	30	98
chr2	188500001	188510000	-1.18569	5.73407e-06	92	99	108	60	18	72
chr2	192700001	192710000	-1.00121	0.000572109	121	68	133	90	24	67
chr2	193470001	193480000	-1.33361	0.000359173	62	47	52	27	13	31
chr2	194530001	194540000	-1.44563	0.000960794	40	48	46	27	3	28
chr2	198560001	198570000	-1.00378	0.000928366	69	71	87	58	17	53
chr2	204230001	204240000	-1.17119	1.95572e-07	116	114	160	77	32	83
chr2	206110001	206120000	-1.03983	2.99162e-05	99	96	124	79	22	75
chr2	210070001	210080000	-1.25945	7.16905e-08	165	102	195	95	27	96
chr2	213690001	213700000	-1.09889	1.92047e-08	201	186	296	123	65	158
chr2	239050001	239060000	-1.05357	7.84688e-12	507	419	601	319	101	425
chr2	239980001	239990000	-1.09577	4.65833e-16	701	589	806	408	154	547
chr2	241400001	241410000	-1.05087	0.00340595	584	531	748	337	124	586
chr2	241510001	241520000	-1.13599	0.000754087	474	374	550	245	87	408
chr2	241870001	241880000	-1.05044	0.014692	294	253	344	197	45	280
chr2	241900001	241910000	-1.13136	0.00503413	422	380	525	227	78	409
chr2	242140001	242150000	-1.30486	1.63779e-06	520	394	625	248	90	376
chr2	242710001	242720000	-1.0489	1.47555e-12	492	448	651	319	117	434
chr2	242750001	242760000	-1.33048	0.000242644	491	495	667	275	78	432
chr3	5320001	5330000	-1.07124	0.000292309	113	69	126	68	16	85
chr3	14070001	14080000	-1.00124	4.93904e-05	121	99	170	87	26	108
chr3	52520001	52530000	-1.17722	1.7344e-14	487	410	594	310	83	370
chr3	67490001	67500000	-1.09796	0.00012445	96	73	94	62	15	64
chr3	76840001	76850000	-1.0306	0.0176777	36	52	59	31	8	44
chr3	90030001	90040000	-1.37875	0.000515261	51	36	57	26	9	27
chr3	98550001	98560000	-1.01558	0.000270204	95	79	99	55	22	75
chr3	100400001	100410000	-1.15816	2.22689e-06	142	88	154	87	27	79
chr3	114070001	114080000	-1.22849	9.62963e-12	203	185	238	112	51	133
chr3	114900001	114910000	-1.0303	0.00051115	90	64	99	54	18	68
chr3	124080001	124090000	-1.38146	1.95743e-05	65	65	89	39	8	50
chr3	125670001	125680000	-1.30172	6.9005e-09	126	119	154	70	24	89
chr3	146790001	146800000	-1.47747	0.000220356	45	39	55	24	8	24
chr3	150530001	150540000	-1.20177	3.87603e-06	127	91	129	54	27	87
chr3	156720001	156730000	-1.005	0.000830842	83	64	87	59	21	50
chr3	166250001	166260000	-1.04023	1.0812e-05	104	108	149	80	28	89
chr3	174850001	174860000	-1.02878	0.000267419	114	79	126	68	18	94
chr3	178830001	178840000	-1.17767	0.000830354	58	48	69	34	12	41
chr3	180540001	180550000	-1.00767	1.18503e-07	206	170	242	134	44	171
chr3	189890001	189900000	-1.02162	8.34604e-05	118	98	129	61	39	84
chr3	195590001	195600000	-1.07099	9.95466e-11	463	360	553	288	86	381
chr4	670001	680000	-1.04244	7.90026e-11	446	403	582	264	115	398
chr4	710001	720000	-1.06954	2.42577e-05	551	429	691	352	108	462
chr4	720001	730000	-1.02682	1.2724e-11	557	438	667	356	115	462
chr4	820001	830000	-1.0142	0.00980246	431	324	473	238	79	398
chr4	860001	870000	-1.09005	2.3856e-13	539	429	718	343	123	424
chr4	900001	910000	-1.04143	1.35762e-15	506	454	631	360	115	402
chr4	950001	960000	-1.19707	1.29811e-05	672	605	804	393	116	563
chr4	960001	970000	-1.06208	0.00696922	370	280	496	218	72	348
chr4	980001	990000	-1.31774	3.87233e-17	496	399	625	250	92	347
chr4	1000001	1010000	-1.04315	3.88513e-07	212	194	300	140	45	207
chr4	1010001	1020000	-1.20593	0.00142188	518	464	763	267	113	480
chr4	1020001	1030000	-1.206	0.00255207	480	386	596	227	87	422
chr4	1200001	1210000	-1.43267	2.72533e-07	527	527	812	298	91	415
chr4	1210001	1220000	-1.18321	4.98519e-18	713	622	899	405	155	549
chr4	1220001	1230000	-1.06624	3.4227e-16	776	659	956	511	166	626
chr4	1230001	1240000	-1.20237	1.20073e-15	608	561	852	371	126	504
chr4	1320001	1330000	-1.01129	6.25498e-12	629	481	683	416	119	493
chr4	1360001	1370000	-1.1175	1.98824e-14	807	637	918	444	164	631
chr4	1370001	1380000	-1.20666	0.00096861	779	639	928	368	143	669
chr4	1530001	1540000	-1.07181	5.40526e-14	594	484	719	366	128	476
chr4	1560001	1570000	-1.04088	1.19314e-11	583	524	724	387	118	525
chr4	1600001	1610000	-1.00842	1.92525e-12	708	625	850	451	159	631
chr4	1750001	1760000	-1.14971	0.0304674	242	164	302	112	41	219
chr4	1780001	1790000	-1.01464	1.11033e-10	520	448	715	357	118	475
chr4	1800001	1810000	-1.65786	1.59059e-06	634	550	879	261	82	426
chr4	2060001	2070000	-1.1573	0.000275461	376	302	450	200	68	320
chr4	3440001	3450000	-1.52009	1.37974e-06	544	461	734	221	90	380
chr4	3470001	3480000	-1.07902	2.38886e-14	671	689	767	431	146	583
chr4	3480001	3490000	-1.00644	0.000868806	449	400	602	275	107	443
chr4	3540001	3550000	-1.44034	5.15624e-05	60	52	102	29	10	50
chr4	4050001	4060000	-1.10062	0.0104472	65	59	39	47	11	30
chr4	12110001	12120000	-1.09085	0.0174579	42	40	40	30	13	20
chr4	20180001	20190000	-1.07302	0.0070146	53	36	75	42	12	33
chr4	21160001	21170000	-1.13375	0.0304865	26	41	48	28	3	31
chr4	25500001	25510000	-1.13617	4.97347e-16	387	347	501	255	91	284
chr4	27640001	27650000	-1.29653	0.0237999	22	27	35	19	4	16
chr4	30220001	30230000	-1.18972	0.00363698	42	38	68	25	13	33
chr4	36790001	36800000	-1.25872	0.0123865	30	34	35	20	6	21
chr4	37670001	37680000	-1.05426	1.17791e-05	122	100	152	75	27	101
chr4	40440001	40450000	-1.05445	6.69822e-09	179	178	246	137	48	140
chr4	45210001	45220000	-1.16521	0.00114973	66	68	79	36	9	66
chr4	47380001	47390000	-1.02034	0.00259585	67	53	80	40	15	56
chr4	49330001	49340000	-1.11254	0.00628241	53	46	55	43	14	22
chr4	54220001	54230000	-1.03034	0.000148483	101	79	154	76	23	85
chr4	59940001	59950000	-1.10491	0.00363698	44	57	60	40	13	31
chr4	61490001	61500000	-1.15234	0.000707257	65	53	106	52	11	52
chr4	64550001	64560000	-1.24509	0.00141508	57	37	63	25	13	35
chr4	65190001	65200000	-1.09076	0.0165489	42	46	37	29	13	23
chr4	77660001	77670000	-1.01333	7.06878e-08	223	199	321	148	61	201
chr4	80690001	80700000	-1.36826	0.00154765	53	35	57	22	5	38
chr4	81260001	81270000	-1.04786	0.026023	47	36	38	35	8	24
chr4	97080001	97090000	-1.01337	0.011656	44	68	55	44	10	42
chr4	97280001	97290000	-1.17668	0.0424389	38	38	21	24	4	23
chr4	97660001	97670000	-1.03993	0.000539013	90	65	93	57	15	66
chr4	99250001	99260000	-1.11379	0.000116178	96	85	115	83	12	65
chr4	102810001	102820000	-1.26756	0.00639618	34	45	38	26	6	24
chr4	107120001	107130000	-1.08885	0.000397785	64	67	92	53	16	49
chr4	122850001	122860000	-1.05886	3.28901e-06	140	125	161	82	30	120
chr4	124030001	124040000	-1.0556	0.000476861	76	70	112	53	16	72
chr4	132640001	132650000	-1.5954	0.0168163	526	233	581	120	86	262
chr4	132650001	132660000	-2.15375	0.000119316	1204	513	1241	195	141	346
chr4	132660001	132670000	-1.97121	1.75725e-09	624	603	790	228	123	170
chr4	132670001	132680000	-2.20544	3.15632e-06	320	492	249	108	38	123
chr4	132680001	132690000	-1.75354	2.51231e-20	362	245	382	113	46	171
chr4	132890001	132900000	-1.2453	8.99509e-12	243	188	304	140	44	167
chr4	132900001	132910000	-1.09207	0.0134701	50	32	53	22	14	33
chr4	139530001	139540000	-1.29292	0.00163329	54	34	57	25	8	34
chr4	141560001	141570000	-1.05795	1.67525e-09	304	242	387	178	73	250
chr4	158370001	158380000	-1.53351	0.00104211	34	34	40	17	6	19
chr4	160680001	160690000	-1.18401	0.00763336	44	58	46	35	4	39
chr4	162200001	162210000	-1.05449	0.00161995	61	70	80	56	10	52
chr4	164920001	164930000	-1.15363	0.0041333	47	44	51	32	8	33
chr4	165000001	165010000	-1.23899	0.0491737	39	17	26	21	4	15
chr4	165100001	165110000	-1.01213	1.35108e-05	133	115	143	84	27	110
chr4	165180001	165190000	-1.04702	0.0224785	38	32	57	31	7	32
chr4	166720001	166730000	-1.08882	0.0139541	38	33	58	30	9	29
chr4	175210001	175220000	-1.32139	6.78868e-07	96	75	115	54	21	52
chr4	175610001	175620000	-1.28409	3.28941e-07	99	120	141	54	28	82
chr4	190220001	190230000	-1.08148	0.0241997	282	161	379	186	48	218
chr4	190940001	190950000	-3.74948	3.14361e-15	56	65	86	4	4	9
chr4	190980001	190990000	-2.38323	5.32582e-14	94	99	111	18	6	43
chr4	190990001	191000000	-3.23857	0.000316969	10	16	36	2	2	3
chr4	191000001	191010000	-3.48665	0.000658111	63	36	77	1	3	13
chr4	191040001	191050000	-1.13559	0.019663	36	28	47	21	7	29
chr5	480001	490000	-1.13913	5.94394e-06	573	425	781	328	132	438
chr5	490001	500000	-1.10303	0.000197008	677	574	878	398	137	614
chr5	500001	510000	-1.1245	2.32932e-13	609	488	750	332	136	483
chr5	530001	540000	-1.005	1.81671e-11	592	509	719	410	119	521
chr5	660001	670000	-1.11359	6.87411e-05	556	550	810	363	123	538
chr5	670001	680000	-1.12844	0.000244705	380	333	563	237	82	350
chr5	1060001	1070000	-1.10954	1.5525e-14	785	709	1079	479	187	677
chr5	1070001	1080000	-1.51358	9.00155e-08	679	596	864	305	99	472
chr5	1080001	1090000	-1.40611	1.94668e-06	756	711	1140	430	128	591
chr5	1210001	1220000	-1.0744	1.93212e-13	635	612	850	413	146	577
chr5	1290001	1300000	-1.01291	1.76292e-11	465	374	577	287	116	381
chr5	1460001	1470000	-1.02401	6.44416e-14	751	626	896	493	160	627
chr5	7300001	7310000	-1.20791	0.000649145	56	49	68	39	10	36
chr5	21470001	21480000	-1.00481	0.0124065	222	175	138	125	42	142
chr5	22200001	22210000	-1.0356	0.0363187	35	35	47	17	15	29
chr5	26660001	26670000	-1.12818	2.48752e-07	202	148	231	101	39	161
chr5	28800001	28810000	-1.03339	2.18733e-05	147	111	189	93	27	130
chr5	39070001	39080000	-1.08111	0.00250905	61	45	71	40	17	35
chr5	43700001	43710000	-1.25235	0.000132752	70	58	67	36	14	42
chr5	46160001	46170000	-1.14532	0.0101982	41	38	60	21	18	27
chr5	53660001	53670000	-1.08994	0.000515969	68	70	73	46	16	50
chr5	57850001	57860000	-1.05427	1.60739e-05	136	149	191	97	25	145
chr5	62620001	62630000	-1.12726	0.00830736	55	42	47	40	6	31
chr5	70730001	70740000	-1.1876	0.017288	43	22	64	20	10	32
chr5	85270001	85280000	-1.19869	2.65745e-05	94	77	89	60	22	44
chr5	99070001	99080000	-1.21043	0.00110169	71	41	65	38	16	30
chr5	100430001	100440000	-1.0025	0.0266782	52	37	39	30	13	28
chr5	103740001	103750000	-1.12948	0.000425446	68	61	72	41	16	46
chr5	140170001	140180000	-1.33152	1.35226e-06	90	100	129	43	21	78
chr5	140180001	140190000	-1.59983	3.95278e-13	166	147	258	71	33	104
chr5	140200001	140210000	-1.35131	4.35728e-08	99	101	124	62	18	64
chr5	140220001	140230000	-1.18895	5.97604e-06	93	102	138	52	30	78
chr5	140230001	140240000	-1.35841	3.73094e-08	97	106	155	70	19	69
chr5	140250001	140260000	-1.72456	3.16812e-09	86	77	145	39	12	54
chr5	162640001	162650000	-1.19958	8.90304e-05	76	64	96	56	11	51
chr5	175670001	175680000	-1.60065	3.09308e-06	74	56	66	27	8	39
chr5	175680001	175690000	-1.42841	0.00410237	36	28	35	16	7	18
chr5	176880001	176890000	-1.32607	6.52914e-14	287	230	350	150	47	197
chr5	177120001	177130000	-1.12322	0.0231823	31	39	51	25	4	36
chr6	4540001	4550000	-1.03553	0.00166761	62	66	112	62	13	59
chr6	13130001	13140000	-1.04568	0.000113735	105	86	109	73	16	79
chr6	15750001	15760000	-1.03463	1.45585e-06	162	129	176	102	31	127
chr6	31420001	31430000	-1.92758	8.20904e-06	40	41	56	13	4	24
chr6	32560001	32570000	-4.01727	4.96161e-05	21	39	10	1	1	3
chr6	53170001	53180000	-1.01652	0.0261753	35	37	60	23	12	37
chr6	55770001	55780000	-1.44919	8.25805e-06	64	55	86	31	12	41
chr6	57910001	57920000	-1.15962	0.0213957	40	36	41	18	5	38
chr6	58390001	58400000	-1.07499	0.00191753	51	57	76	40	14	44
chr6	58510001	58520000	-1.3615	1.68404e-06	90	72	127	44	17	65
chr6	63870001	63880000	-1.25433	2.31987e-05	91	77	98	53	10	67
chr6	65830001	65840000	-1.22104	0.0123243	50	26	40	24	6	27
chr6	71970001	71980000	-1.55256	5.16619e-08	75	84	108	36	15	51
chr6	81620001	81630000	-1.15901	0.00509891	45	46	48	29	15	24
chr6	89940001	89950000	-1.00277	4.38713e-06	132	118	147	93	34	95
chr6	110960001	110970000	-1.08016	1.90826e-13	330	289	413	218	87	237
chr6	112840001	112850000	-1.01238	0.00209121	70	66	67	44	16	54
chr6	120550001	120560000	-1.0758	0.0344047	33	25	46	23	8	24
chr6	122050001	122060000	-1.1738	5.08615e-05	92	76	129	62	13	77
chr6	122480001	122490000	-1.0981	1.55857e-05	113	118	175	102	18	101
chr6	123170001	123180000	-1.12649	5.53719e-05	85	73	125	54	22	68
chr6	123860001	123870000	-1.02885	0.00666192	53	47	68	36	10	48
chr6	124080001	124090000	-1.14803	0.000178582	66	74	82	48	14	52
chr6	127790001	127800000	-1.02359	3.32468e-06	145	127	222	110	36	127
chr6	131120001	131130000	-1.13829	3.75274e-06	109	87	141	72	27	71
chr6	135680001	135690000	-1.28451	2.58722e-07	123	113	153	75	15	96
chr6	141320001	141330000	-1.24375	0.000426688	51	54	69	30	13	39
chr6	144500001	144510000	-1.12153	1.02358e-06	140	108	171	86	42	81
chr6	160670001	160680000	-1.32064	2.26134e-08	108	101	141	65	25	66
chr6	165030001	165040000	-1.04204	0.0104752	44	40	60	29	14	34
chr7	290001	300000	-1.04983	8.57585e-06	826	692	1102	536	183	732
chr7	400001	410000	-1.00129	2.91051e-15	459	418	525	343	111	337
chr7	410001	420000	-1.06904	4.49741e-05	632	486	733	358	128	528
chr7	590001	600000	-1.30689	2.70418e-19	827	624	952	407	145	552
chr7	610001	620000	-1.04427	1.36337e-14	853	776	1059	533	201	745
chr7	630001	640000	-1.19174	4.40612e-18	536	448	722	336	124	372
chr7	920001	930000	-1.09889	0.000116849	769	667	1012	462	159	703
chr7	930001	940000	-1.16772	4.8075e-06	753	669	1007	408	170	643
chr7	940001	950000	-1.27065	8.00321e-14	400	330	472	208	66	299
chr7	950001	960000	-1.10699	1.01072e-05	590	460	670	348	107	476
chr7	980001	990000	-1.02141	1.09323e-12	453	390	575	326	98	373
chr7	1020001	1030000	-1.14931	2.67175e-11	390	314	523	246	72	317
chr7	1030001	1040000	-1.01625	1.62371e-11	583	450	668	369	118	477
chr7	1040001	1050000	-1.2205	5.70728e-05	560	471	706	286	107	465
chr7	1050001	1060000	-1.19781	1.00859e-15	471	387	601	284	91	348
chr7	1090001	1100000	-1.14005	1.47555e-12	557	446	679	296	118	448
chr7	1140001	1150000	-1.0203	1.20073e-15	640	582	831	440	161	538
chr7	1360001	1370000	-1.10537	4.96212e-13	546	506	686	349	108	476
chr7	1480001	1490000	-1.41418	1.18139e-05	571	463	726	268	85	421
chr7	1510001	1520000	-1.56566	0.000131355	666	571	887	259	92	493
chr7	1520001	1530000	-1.45073	3.68132e-08	912	721	1176	430	143	614
chr7	1530001	1540000	-1.19124	5.23505e-23	916	738	1010	522	182	617
chr7	1570001	1580000	-1.46834	3.90608e-06	350	307	458	165	50	258
chr7	1580001	1590000	-1.60526	0.000244149	705	581	890	250	91	503
chr7	1590001	1600000	-1.00297	1.17617e-09	451	367	598	298	101	405
chr7	1780001	1790000	-1.22905	1.30783e-15	593	526	794	323	125	474
chr7	1860001	1870000	-1.05445	0.000488083	73	75	141	64	20	72
chr7	1950001	1960000	-1.00409	1.24408e-12	810	725	953	508	185	725
chr7	1980001	1990000	-1.07311	8.84853e-15	679	577	772	413	141	548
chr7	2140001	2150000	-1.22892	1.37601e-05	498	353	634	317	79	345
chr7	2290001	2300000	-1.20011	4.2657e-19	752	658	934	428	156	572
chr7	2560001	2570000	-1.34457	0.00498026	258	223	295	105	38	219
chr7	2570001	2580000	-1.28364	4.32862e-11	243	195	301	113	49	178
chr7	2640001	2650000	-1.01573	4.00798e-11	542	396	660	372	110	421
chr7	2670001	2680000	-1.14331	1.57027e-09	220	241	347	147	56	209
chr7	4820001	4830000	-1.32221	1.9677e-18	695	581	854	359	118	501
chr7	5340001	5350000	-1.04125	1.00719e-06	189	175	261	117	43	185
chr7	32220001	32230000	-1.03652	3.38981e-05	111	100	152	98	32	66
chr7	36000001	36010000	-1.4615	0.020553	142	119	191	40	27	116
chr7	45850001	45860000	-1.34463	0.0459596	203	143	261	74	28	181
chr7	55410001	55420000	-1.02069	2.83832e-11	394	340	489	247	96	335
chr7	56430001	56440000	-1.22665	5.72441e-07	210	112	183	89	33	122
chr7	56440001	56450000	-1.01806	0.000522838	90	65	120	54	26	69
chr7	56880001	56890000	-1.62409	0.0190692	462	260	441	113	45	293
chr7	57480001	57490000	-1.06746	7.60056e-07	210	144	214	121	34	157
chr7	57920001	57930000	-1.34635	1.3551e-07	94	98	166	69	24	63
chr7	63210001	63220000	-1.92373	0.0193843	251	237	461	68	25	209
chr7	63220001	63230000	-1.23339	0.000348531	69	61	84	38	8	60
chr7	64420001	64430000	-1.15598	4.66889e-05	87	67	108	49	22	59
chr7	64640001	64650000	-1.31971	0.0207301	23	26	33	17	5	15
chr7	66360001	66370000	-1.38226	4.26308e-17	330	285	461	203	55	212
chr7	72690001	72700000	-1.67191	4.93202e-07	82	49	94	26	13	39
chr7	74980001	74990000	-1.22062	0.0436283	24	19	39	18	8	12
chr7	75700001	75710000	-1.38695	1.92319e-05	293	262	383	144	45	231
chr7	76470001	76480000	-2.20334	0.00196888	20	20	24	4	1	11
chr7	76670001	76680000	-1.25215	0.00115736	54	99	59	52	12	40
chr7	79360001	79370000	-1.00024	2.30874e-05	127	122	169	77	36	120
chr7	85950001	85960000	-1.01042	0.0288693	57	33	48	22	13	41
chr7	90890001	90900000	-1.21211	4.4524e-09	146	155	243	113	38	111
chr7	93830001	93840000	-1.09219	0.000296981	95	66	85	64	17	50
chr7	94470001	94480000	-1.20597	3.23084e-06	126	90	150	66	20	95
chr7	100280001	100290000	-1.0181	2.43385e-10	549	487	659	338	118	506
chr7	149890001	149900000	-1.77514	6.79401e-07	55	51	87	19	11	32
chr7	153410001	153420000	-1.03515	0.0203814	37	39	49	24	11	33
chr7	157210001	157220000	-1.09256	1.07332e-13	665	537	820	441	125	529
chr8	7420001	7430000	-1.24627	9.98262e-06	111	73	128	79	18	52
chr8	7430001	7440000	-1.3534	0.00141577	780	445	544	380	134	241
chr8	7870001	7880000	-1.55991	3.14688e-07	794	498	556	290	124	269
chr8	7880001	7890000	-1.33966	0.0273152	738	385	386	301	126	211
chr8	12270001	12280000	-1.08982	3.41562e-05	127	94	120	94	27	59
chr8	42260001	42270000	-1.13572	1.90826e-13	370	274	440	234	79	240
chr8	49390001	49400000	-1.07423	4.72885e-05	89	96	113	59	31	65
chr8	53480001	53490000	-1.21266	1.52342e-07	170	118	163	77	30	113
chr8	57930001	57940000	-1.04391	0.000324979	113	77	145	54	32	91
chr8	58170001	58180000	-1.24137	0.000892865	333	268	342	154	51	266
chr8	58190001	58200000	-1.17094	0.00259585	214	174	252	134	29	179
chr8	62660001	62670000	-1.37682	6.21157e-05	64	56	99	36	8	53
chr8	63300001	63310000	-1.76858	4.7897e-13	138	102	142	46	18	62
chr8	83130001	83140000	-1.07505	0.000488779	90	69	81	43	25	57
chr8	83600001	83610000	-1.25841	0.000728031	71	40	67	36	9	40
chr8	92310001	92320000	-1.1015	0.0269991	40	24	52	31	9	20
chr8	100040001	100050000	-1.04351	3.89326e-06	126	122	158	102	24	100
chr8	117690001	117700000	-1.36872	1.75263e-06	93	74	137	43	19	69
chr8	125310001	125320000	-1.17084	1.8647e-07	145	111	203	98	30	101
chr8	142230001	142240000	-1.03466	8.52001e-05	559	415	686	343	115	473
chr8	142430001	142440000	-1.0569	4.41142e-11	580	494	699	325	132	508
chr8	142440001	142450000	-1.04999	0.000507907	328	285	444	186	81	307
chr8	143620001	143630000	-1.20024	4.14985e-13	480	402	641	264	98	389
chr8	144460001	144470000	-1.26352	9.29925e-06	425	423	596	235	86	371
chr8	144650001	144660000	-1.35262	0.000358979	315	281	382	161	43	255
chr8	144870001	144880000	-1.1505	7.58653e-15	647	588	817	388	130	543
chr8	144880001	144890000	-1.04438	6.84198e-13	624	579	765	400	137	557
chr8	144890001	144900000	-1.10421	0.000193832	591	476	683	321	114	509
chr8	144940001	144950000	-1.12943	5.04588e-05	775	598	1009	451	155	645
chr8	144960001	144970000	-1.03834	3.14561e-14	732	605	868	460	160	602
chr8	144990001	145000000	-1.73342	7.82879e-10	759	669	1065	278	114	458
chr8	145000001	145010000	-1.72703	0.000376811	416	356	554	134	49	291
chr8	145010001	145020000	-1.18913	0.029306	219	176	302	112	35	216
chr8	145020001	145030000	-1.07079	0.0090629	249	213	331	153	45	248
chr8	145110001	145120000	-1.23691	0.00021437	523	439	776	282	108	449
chr8	145530001	145540000	-1.0647	8.35977e-12	537	481	693	336	117	482
chr8	145620001	145630000	-1.40673	0.000971424	563	533	745	329	70	452
chr8	145640001	145650000	-1.17022	2.19007e-12	436	339	583	298	76	321
chr8	145660001	145670000	-1.29699	4.17077e-07	520	437	642	274	87	396
chr8	145730001	145740000	-1.43633	0.00662697	364	283	545	160	52	308
chr8	145770001	145780000	-1.00433	1.70104e-12	625	489	708	370	150	498
chr8	145820001	145830000	-1.11801	1.04846e-13	746	533	891	435	148	552
chr9	2710001	2720000	-1.11761	2.60176e-08	180	148	266	126	47	130
chr9	5410001	5420000	-1.05081	6.74308e-08	172	155	196	118	36	133
chr9	5430001	5440000	-1.11456	2.39715e-11	243	205	278	153	54	170
chr9	10820001	10830000	-1.01252	0.00941374	45	65	71	49	8	48
chr9	18770001	18780000	-1.07906	3.39506e-07	208	166	291	136	40	184
chr9	22920001	22930000	-1.06132	0.00028735	75	73	89	59	18	51
chr9	23360001	23370000	-1.01022	0.0107236	57	49	62	53	8	36
chr9	31250001	31260000	-1.25635	2.46325e-12	221	183	264	118	48	146
chr9	34370001	34380000	-1.25092	1.32008e-13	282	221	358	166	55	186
chr9	39010001	39020000	-1.5407	0.00753633	24	31	39	12	12	9
chr9	39020001	39030000	-1.06962	0.0151559	47	34	48	34	8	28
chr9	39170001	39180000	-1.68359	0.0380987	21	12	16	7	3	7
chr9	40700001	40710000	-1.03366	0.00460087	103	56	73	39	20	68
chr9	42170001	42180000	-1.29641	0.0061574	47	33	42	15	8	33
chr9	42200001	42210000	-1.22011	0.0152893	30	31	47	19	5	29
chr9	45350001	45360000	-1.21491	0.00119116	58	39	77	38	15	29
chr9	46560001	46570000	-1.78555	0.0228582	21	18	13	6	3	8
chr9	66110001	66120000	-1.88031	0.0246026	12	36	11	8	2	9
chr9	70600001	70610000	-2.39178	0.00073004	38	29	11	9	3	5
chr9	90430001	90440000	-1.16242	6.04423e-07	145	112	172	75	29	112
chr9	91240001	91250000	-1.5662	1.67635e-08	101	76	119	36	18	57
chr9	95590001	95600000	-1.01747	6.78868e-07	214	183	316	133	60	197
chr9	102550001	102560000	-1.16943	0.000505564	75	63	61	48	13	40
chr9	102820001	102830000	-1.00002	0.000159755	99	76	120	69	26	69
chr9	108110001	108120000	-1.10333	0.00131289	59	57	71	35	20	40
chr9	120780001	120790000	-1.01241	0.00923749	48	54	67	31	12	52
chr9	138660001	138670000	-1.08284	0.00181824	511	455	687	325	98	497
chr9	138870001	138880000	-1.03702	9.462e-10	487	377	604	290	103	422
chr9	138900001	138910000	-1.00064	2.01991e-10	504	477	663	347	113	485
chr9	138990001	139000000	-1.01076	2.45844e-09	427	354	471	259	84	374
chr9	139220001	139230000	-1.08739	0.000905391	444	379	574	243	97	412
chr9	139230001	139240000	-1.23552	0.000443131	508	410	660	273	85	429
chr9	139250001	139260000	-1.41203	0.000291908	517	430	630	220	76	402
chr9	139260001	139270000	-1.08779	0.00137762	466	400	547	239	99	425
chr9	139390001	139400000	-1.66093	2.91543e-07	702	582	877	257	93	445
chr9	139400001	139410000	-1.72914	2.56926e-07	770	591	1035	290	94	459
chr9	139410001	139420000	-1.31435	8.57289e-18	541	521	724	305	98	422
chr9	139420001	139430000	-1.23926	0.000728285	311	214	327	152	44	230
chr9	139720001	139730000	-1.00922	3.8687e-12	619	488	736	375	146	509
chr9	139730001	139740000	-1.18816	0.000371455	364	302	513	206	71	319
chr9	139740001	139750000	-1.04117	0.0477033	271	249	401	159	56	311
chr9	139840001	139850000	-1.15861	0.00195809	334	286	444	181	63	311
chr9	139860001	139870000	-1.02424	0.00881157	451	360	537	277	80	431
chr9	139900001	139910000	-1.55899	2.20352e-06	633	503	759	235	91	417
chr9	139910001	139920000	-1.48259	2.20352e-06	759	623	995	327	118	539
chr9	140000001	140010000	-1.24418	0.00048177	619	499	798	312	108	523
chr9	140070001	140080000	-1.04953	1.18524e-12	617	574	797	399	139	560
chr9	140110001	140120000	-1.30804	4.03732e-13	257	242	395	148	58	197
chr9	140210001	140220000	-1.16501	4.59633e-11	400	295	461	215	70	306
chr9	140240001	140250000	-1.24156	9.86141e-16	499	413	597	290	82	365
chr9	140280001	140290000	-1.31195	1.02827e-06	558	460	801	286	113	426
chr9	140320001	140330000	-1.13447	0.00266181	562	442	686	313	96	501
chr9	140330001	140340000	-1.02759	5.36237e-11	316	292	446	225	83	271
chr9	140340001	140350000	-1.20776	5.28508e-13	457	335	484	243	73	321
chr9	140350001	140360000	-1.18873	0.000104651	532	402	624	276	93	425
chr10	31650001	31660000	-1.14181	1.11105e-09	195	168	212	109	48	133
chr10	32780001	32790000	-1.17578	0.0020362	57	44	85	26	16	48
chr10	37940001	37950000	-1.07139	0.00045083	82	66	96	60	12	62
chr10	38490001	38500000	-1.0889	0.00525735	42	51	70	30	12	44
chr10	38890001	38900000	-1.24296	0.000270619	69	72	95	41	8	68
chr10	39020001	39030000	-1.14076	8.23247e-08	158	119	163	93	33	98
chr10	45690001	45700000	-1.19361	5.46291e-10	170	164	241	108	48	121
chr10	49210001	49220000	-1.01531	2.22689e-06	135	132	189	105	46	96
chr10	49230001	49240000	-1.00801	0.00140215	65	90	116	72	28	47
chr10	51220001	51230000	-1.11558	0.0163942	45	43	55	29	21	18
chr10	52110001	52120000	-1.18368	3.38981e-05	92	75	157	64	20	76
chr10	52470001	52480000	-1.02598	0.0026825	57	55	86	52	17	39
chr10	57900001	57910000	-1.09357	0.0117501	40	34	55	29	11	27
chr10	75440001	75450000	-1.0813	9.63895e-07	144	116	145	84	34	96
chr10	77160001	77170000	-1.14713	8.4606e-08	155	120	186	86	39	105
chr10	86470001	86480000	-1.00097	0.000237597	101	87	97	63	21	78
chr10	89100001	89110000	-1.12714	0.0378285	35	26	35	14	8	27
chr10	93080001	93090000	-1.07618	0.0265942	116	120	142	94	15	111
chr10	114330001	114340000	-1.05906	9.00155e-08	151	150	185	108	44	107
chr10	134010001	134020000	-1.22893	0.0060734	881	684	1043	389	149	766
chr10	134210001	134220000	-1.06149	0.0026761	471	332	554	276	84	401
chr10	134220001	134230000	-1.03149	0.000253973	505	408	657	329	104	457
chr10	134230001	134240000	-1.13869	0.000141713	350	276	360	182	60	281
chr10	134260001	134270000	-1.01394	1.10217e-08	290	267	371	191	63	272
chr10	134560001	134570000	-1.01386	4.1664e-17	864	738	1033	589	197	697
chr10	134580001	134590000	-1.01573	2.96241e-13	689	531	829	444	154	549
chr10	134590001	134600000	-1.14071	2.15385e-12	478	415	640	267	111	402
chr10	134720001	134730000	-1.02474	3.82158e-13	662	572	845	428	155	575
chr10	134730001	134740000	-1.3926	1.57793e-06	841	726	1008	354	151	613
chr10	134820001	134830000	-1.13334	0.00813444	655	534	788	332	117	613
chr10	134890001	134900000	-1.03165	0.015277	569	540	742	331	120	613
chr10	134940001	134950000	-1.09771	3.54727e-12	560	444	679	342	106	457
chr10	135010001	135020000	-1.32354	0.000167338	695	563	895	314	122	556
chr10	135020001	135030000	-1.00938	2.89511e-13	907	693	1056	564	200	734
chr10	135080001	135090000	-1.36939	0.00258055	490	468	612	196	85	427
chr10	135480001	135490000	-2.22894	0.00258055	22	20	20	2	2	11
chr10	135490001	135500000	-3.61979	2.11563e-11	1391	1063	1815	99	41	273
chr11	180001	190000	-2.67772	6.146e-06	83	69	175	24	4	32
chr11	480001	490000	-1.35009	4.08029e-18	592	471	743	285	108	407
chr11	490001	500000	-1.03538	8.35977e-12	648	571	748	425	125	567
chr11	550001	560000	-1.00921	0.0026085	468	386	582	278	98	452
chr11	720001	730000	-1.10152	0.0119009	260	216	311	148	42	248
chr11	790001	800000	-1.29813	0.00122046	355	330	481	183	58	320
chr11	800001	810000	-1.04516	2.48845e-09	382	323	426	224	74	334
chr11	850001	860000	-1.04854	4.71823e-10	419	348	543	283	81	367
chr11	1020001	1030000	-1.36981	3.43605e-06	793	686	1125	354	167	599
chr11	1030001	1040000	-1.33279	0.000105469	650	511	788	308	100	501
chr11	1080001	1090000	-1.07678	0.00108856	766	593	825	405	143	661
chr11	1090001	1100000	-1.04623	0.00208481	622	501	751	381	115	575
chr11	1150001	1160000	-1.28015	0.00276289	602	532	825	280	110	548
chr11	1210001	1220000	-1.07156	0.000123966	825	643	884	450	161	685
chr11	1220001	1230000	-1.32975	7.1134e-05	525	437	658	254	84	417
chr11	1240001	1250000	-1.30089	0.000316262	556	493	693	262	95	470
chr11	1250001	1260000	-1.54444	6.91991e-05	664	592	859	259	96	495
chr11	1260001	1270000	-1.28548	3.4227e-16	431	358	519	223	78	309
chr11	1270001	1280000	-1.13317	6.43439e-06	592	510	701	331	117	502
chr11	1290001	1300000	-1.13296	8.83823e-14	619	607	799	404	121	547
chr11	1460001	1470000	-1.06359	0.007174	315	273	382	181	58	309
chr11	1470001	1480000	-1.21213	0.00361233	623	532	714	273	115	549
chr11	1480001	1490000	-1.1075	1.47555e-12	543	503	725	339	116	486
chr11	1490001	1500000	-1.07747	8.60525e-13	544	448	685	351	110	449
chr11	1950001	1960000	-1.06113	2.56755e-12	553	475	746	392	113	473
chr11	2010001	2020000	-1.18319	0.000226611	607	473	790	364	104	499
chr11	2410001	2420000	-1.12739	2.35707e-05	552	537	773	330	128	514
chr11	3450001	3460000	-1.05958	0.000732407	77	67	88	61	11	57
chr11	4250001	4260000	-1.93695	0.00909674	17	13	33	4	3	11
chr11	5980001	5990000	-1.01752	1.97558e-05	111	115	145	76	28	103
chr11	6290001	6300000	-1.04749	5.4162e-10	239	200	263	164	52	168
chr11	7110001	7120000	-1.19235	3.35147e-07	132	100	167	79	25	93
chr11	25650001	25660000	-1.00897	0.0396587	33	34	71	35	6	38
chr11	28910001	28920000	-1.06722	0.00100634	74	57	97	44	15	64
chr11	36570001	36580000	-1.62311	1.29993e-05	76	40	81	23	9	40
chr11	48920001	48930000	-1.35095	1.84506e-05	73	54	97	42	12	45
chr11	49420001	49430000	-2.16533	0.00232567	19	21	23	7	5	3
chr11	49820001	49830000	-1.76807	3.154e-06	85	38	94	24	8	40
chr11	55640001	55650000	-1.56859	0.00453901	25	25	40	9	7	17
chr11	56260001	56270000	-1.13999	2.696e-05	110	89	123	57	19	91
chr11	58150001	58160000	-1.08444	0.0157086	58	34	53	24	9	45
chr11	58800001	58810000	-1.7541	0.0297699	22	9	21	8	3	6
chr11	66620001	66630000	-1.2344	8.67666e-07	569	472	731	322	102	449
chr11	67200001	67210000	-1.06987	0.0125999	435	390	516	234	83	437
chr11	67260001	67270000	-1.36795	7.07603e-07	545	452	776	290	95	405
chr11	67810001	67820000	-1.00081	2.04612e-10	510	385	613	338	104	421
chr11	82000001	82010000	-1.14676	0.00175878	65	55	67	27	14	54
chr11	84790001	84800000	-1.02052	0.0306041	47	41	36	28	7	36
chr11	86440001	86450000	-1.10593	1.49676e-05	105	81	126	64	26	71
chr11	88540001	88550000	-1.02903	0.00569579	59	47	57	38	13	39
chr11	89590001	89600000	-1.60733	0.000789073	35	37	54	14	3	31
chr11	90700001	90710000	-1.19061	0.000986582	48	59	85	50	10	36
chr11	92610001	92620000	-1.00173	2.60393e-07	225	158	278	154	49	169
chr11	95210001	95220000	-1.04047	6.05381e-05	96	112	109	67	24	84
chr11	110840001	110850000	-1.05086	4.3221e-05	107	86	124	62	26	83
chr12	9550001	9560000	-1.20464	3.41913e-07	213	129	201	101	29	142
chr12	12560001	12570000	-1.1279	1.43169e-08	174	158	193	104	35	134
chr12	20700001	20710000	-1.13059	1.53934e-08	158	155	193	102	34	126
chr12	34490001	34500000	-1.77586	0.000346014	559	505	755	188	60	391
chr12	34500001	34510000	-1.24378	6.05381e-05	768	704	940	404	136	656
chr12	40740001	40750000	-1.10109	7.53211e-05	92	101	96	52	23	77
chr12	55310001	55320000	-1.25026	1.04535e-09	154	132	175	89	31	98
chr12	64080001	64090000	-1.34131	0.000679854	47	38	62	25	9	31
chr12	78390001	78400000	-1.03715	0.0127667	40	41	61	28	12	37
chr12	84550001	84560000	-1.00503	0.00307665	69	61	62	46	18	43
chr12	87600001	87610000	-1.09657	5.23763e-05	83	100	130	57	24	83
chr12	90340001	90350000	-1.01204	0.0194092	55	52	38	38	10	35
chr12	90800001	90810000	-1.26109	0.00017503	67	47	96	42	13	43
chr12	100680001	100690000	-1.23494	2.94194e-05	102	67	104	57	12	65
chr12	123340001	123350000	-1.22096	0.00291953	418	305	483	214	61	341
chr12	132320001	132330000	-1.16258	2.69573e-16	638	593	792	369	137	521
chr12	132400001	132410000	-1.08321	1.09323e-12	574	514	771	339	145	496
chr12	132630001	132640000	-1.15851	5.66943e-13	553	432	744	330	112	437
chr12	132980001	132990000	-1.16089	2.3322e-05	530	461	651	287	105	455
chr12	133050001	133060000	-1.11514	7.7743e-13	453	424	548	282	89	387
chr12	133100001	133110000	-1.02033	5.45076e-11	469	460	550	292	110	430
chr12	133120001	133130000	-1.3838	2.19417e-05	750	574	955	319	131	544
chr12	133140001	133150000	-1.18045	1.1718e-14	680	595	912	378	150	560
chr13	19240001	19250000	-1.17372	0.0128286	38	36	38	24	6	27
chr13	19410001	19420000	-1.506	0.0497515	84	52	105	19	14	61
chr13	19510001	19520000	-1.41593	0.0005152	326	247	424	124	56	244
chr13	33290001	33300000	-1.18253	1.23299e-07	161	149	228	91	33	145
chr13	39620001	39630000	-1.04037	2.85495e-05	112	87	123	75	25	76
chr13	44540001	44550000	-1.0101	1.08842e-08	250	250	326	171	59	237
chr13	52840001	52850000	-1.46208	3.19685e-05	87	80	58	28	14	51
chr13	53390001	53400000	-1.23255	5.82683e-08	186	123	189	103	24	118
chr13	54520001	54530000	-1.19245	0.00418851	53	38	45	30	10	27
chr13	57230001	57240000	-1.00459	0.00186807	69	61	78	44	16	57
chr13	57770001	57780000	-1.42876	0.00108388	47	38	41	19	12	20
chr13	57780001	57790000	-1.388	0.000248808	59	49	51	32	7	31
chr13	58220001	58230000	-1.10863	0.00147779	64	46	77	41	12	45
chr13	64410001	64420000	-1.07743	4.31012e-10	275	252	347	191	52	234
chr13	65600001	65610000	-1.51301	0.000106212	54	45	62	16	12	34
chr13	81860001	81870000	-1.01907	0.00376605	57	58	68	35	16	50
chr13	104110001	104120000	-1.09811	1.09987e-07	160	146	187	89	44	122
chr13	113720001	113730000	-1.05866	3.50625e-12	385	358	506	275	81	331
chr13	114000001	114010000	-1.01923	1.14394e-13	545	419	654	356	131	406
chr13	114050001	114060000	-1.01947	1.16571e-11	675	610	786	396	160	603
chr13	114320001	114330000	-1.06502	0.0124557	373	342	468	223	68	383
chr13	114500001	114510000	-1.04993	7.71598e-05	666	563	862	380	159	601
chr13	114520001	114530000	-1.122	3.36251e-15	744	613	834	407	156	579
chr13	114530001	114540000	-1.16012	1.68548e-13	621	462	727	348	113	467
chr13	114820001	114830000	-1.18628	4.49686e-17	413	341	503	249	90	280
chr13	114870001	114880000	-1.07323	9.75119e-14	510	410	670	325	143	357
chr13	114880001	114890000	-1.02637	9.57405e-11	378	273	463	251	89	271
chr14	19080001	19090000	-1.29634	0.0020362	42	38	67	33	5	31
chr14	41620001	41630000	-1.42423	1.74256e-06	90	65	86	37	19	43
chr14	41640001	41650000	-1.69581	8.01539e-07	56	62	80	22	16	28
chr14	43850001	43860000	-1.01213	0.0370465	29	39	44	24	10	28
chr14	44020001	44030000	-1.03751	0.00132352	61	72	73	47	19	46
chr14	44830001	44840000	-1.05421	0.0380085	34	30	46	21	15	20
chr14	57800001	57810000	-1.17616	2.11651e-06	103	117	134	67	21	91
chr14	100610001	100620000	-1.20299	9.34546e-13	483	395	612	246	100	384
chr14	104010001	104020000	-1.01494	1.16949e-09	485	414	621	291	114	447
chr14	104620001	104630000	-1.23135	0.00071681	638	498	700	268	120	505
chr14	104630001	104640000	-1.08433	3.4814e-12	574	512	731	348	123	509
chr14	104640001	104650000	-1.40491	0.00141714	506	381	669	218	74	398
chr14	105160001	105170000	-1.061	3.12722e-09	347	289	523	242	79	308
chr14	105170001	105180000	-1.27581	2.10273e-06	536	443	672	259	103	414
chr14	105180001	105190000	-1.00156	0.000852372	394	334	549	282	83	377
chr14	105230001	105240000	-1.06283	0.000571622	405	366	530	268	78	387
chr14	105240001	105250000	-1.09307	2.07764e-05	570	517	677	362	107	504
chr14	105350001	105360000	-1.614	1.26238e-06	537	438	693	215	70	353
chr14	105600001	105610000	-1.24083	1.4743e-16	517	431	676	287	105	383
chr14	105610001	105620000	-1.69892	2.78613e-05	596	497	735	198	73	391
chr14	105620001	105630000	-1.18955	0.000252335	599	483	687	324	98	495
chr14	105670001	105680000	-1.05678	3.77118e-13	466	396	587	307	102	382
chr14	105830001	105840000	-1.00574	2.68998e-09	467	383	516	292	88	410
chr14	105850001	105860000	-1.07283	1.26466e-05	618	562	780	376	134	564
chr14	105910001	105920000	-1.01847	2.93603e-13	560	524	709	395	124	496
chr14	105930001	105940000	-1.36986	1.11844e-06	431	406	563	199	83	334
chr14	105940001	105950000	-1.05788	0.0443926	100	111	193	76	24	125
chr14	105950001	105960000	-1.3362	0.00171746	214	196	315	118	32	191
chr14	106070001	106080000	-1.02993	9.69031e-06	111	109	141	92	28	79
chr14	106090001	106100000	-1.19732	1.61886e-07	112	111	157	74	30	80
chr14	106100001	106110000	-1.36627	0.0146134	96	56	118	63	20	30
chr14	106210001	106220000	-1.30343	1.10639e-05	83	77	112	40	15	70
chr15	28240001	28250000	-1.09738	4.2811e-09	242	189	278	139	48	189
chr15	28700001	28710000	-1.4321	3.52032e-10	180	138	234	70	35	122
chr15	29090001	29100000	-1.20324	5.00083e-05	82	72	117	40	25	63
chr15	30610001	30620000	-1.45477	0.00192744	46	41	43	12	7	35
chr15	32690001	32700000	-1.41921	0.00802875	40	26	37	12	13	15
chr15	32880001	32890000	-1.88304	3.80861e-10	89	71	93	25	14	37
chr15	47250001	47260000	-1.40381	1.05339e-05	69	54	83	37	13	37
chr15	69260001	69270000	-1.02392	2.81598e-05	123	100	119	77	25	89
chr15	82330001	82340000	-1.23357	4.5111e-10	193	167	291	114	51	139
chr15	82800001	82810000	-1.22393	0.0184391	32	25	39	18	9	18
chr15	102290001	102300000	-1.20357	0.020017	548	523	1174	336	176	526
chr15	102520001	102530000	-1.12386	0.0147618	41	52	51	22	7	48
chr16	310001	320000	-1.07359	0.000194948	885	710	1047	522	172	769
chr16	330001	340000	-1.03271	0.0084236	484	437	637	305	95	501
chr16	340001	350000	-1.19948	3.86225e-06	616	537	839	373	118	514
chr16	420001	430000	-1.49267	3.08623e-07	666	590	776	303	91	461
chr16	580001	590000	-1.1705	0.000129324	714	646	970	429	136	647
chr16	590001	600000	-1.63339	2.03755e-05	536	486	692	226	63	374
chr16	600001	610000	-2.07532	2.19947e-09	512	405	733	140	57	248
chr16	610001	620000	-1.27831	0.000800405	307	210	435	155	56	235
chr16	620001	630000	-1.36147	8.57217e-07	431	333	586	210	77	310
chr16	630001	640000	-1.27894	0.00278799	374	270	455	178	55	302
chr16	670001	680000	-1.05576	1.1785e-05	647	549	866	422	141	577
chr16	680001	690000	-1.21577	0.00253012	281	226	379	154	46	249
chr16	700001	710000	-1.45708	5.66637e-05	695	541	920	317	99	507
chr16	710001	720000	-1.09729	9.62963e-12	464	413	593	290	93	407
chr16	720001	730000	-1.61589	4.24841e-06	515	402	619	191	65	331
chr16	730001	740000	-1.10828	0.00131339	473	379	625	275	91	431
chr16	770001	780000	-1.23835	3.20452e-10	250	209	339	128	51	202
chr16	810001	820000	-1.14731	0.00288964	496	405	663	277	91	459
chr16	820001	830000	-1.15278	8.47455e-13	519	456	650	288	107	438
chr16	830001	840000	-1.22731	0.000510063	383	322	452	174	73	320
chr16	840001	850000	-1.57869	2.47354e-07	690	619	862	280	98	471
chr16	890001	900000	-1.01082	0.00068346	719	570	848	429	147	656
chr16	900001	910000	-1.16816	5.02203e-17	775	706	964	476	150	628
chr16	920001	930000	-1.22634	4.9489e-17	916	749	956	440	175	659
chr16	940001	950000	-1.16874	1.95994e-05	809	723	1082	470	165	707
chr16	960001	970000	-1.03293	1.33384e-14	827	788	973	517	197	724
chr16	1030001	1040000	-1.12457	0.000117725	460	466	643	263	112	441
chr16	1090001	1100000	-1.20653	0.0177237	364	349	510	198	61	376
chr16	1140001	1150000	-1.12441	0.00224429	307	286	454	186	64	307
chr16	1150001	1160000	-1.35911	0.0298523	373	321	532	174	49	358
chr16	1170001	1180000	-1.03331	0.000226685	587	519	719	350	129	549
chr16	1210001	1220000	-1.12694	0.00244404	649	572	817	344	128	616
chr16	1220001	1230000	-1.08138	2.35707e-05	596	516	834	415	123	529
chr16	1230001	1240000	-1.17209	1.52508e-05	671	584	907	398	132	581
chr16	1260001	1270000	-1.63153	0.00550732	810	606	1013	259	89	595
chr16	1300001	1310000	-1.22818	5.498e-08	171	167	218	101	25	151
chr16	1360001	1370000	-1.01651	2.40136e-13	544	471	680	360	128	460
chr16	1390001	1400000	-1.27302	7.54235e-05	522	442	675	259	94	432
chr16	1400001	1410000	-1.00598	5.16535e-13	473	448	613	318	125	414
chr16	1410001	1420000	-1.00084	2.10412e-14	602	506	742	409	144	490
chr16	1480001	1490000	-1.42969	4.43381e-05	545	484	700	262	78	422
chr16	1490001	1500000	-1.42204	8.31033e-09	700	587	855	350	104	482
chr16	1500001	1510000	-1.33461	7.36364e-08	922	743	1123	486	148	656
chr16	1550001	1560000	-1.32151	3.38793e-08	765	625	1000	392	140	561
chr16	1570001	1580000	-1.03214	0.000124699	610	538	706	405	115	552
chr16	1580001	1590000	-1.11769	8.6305e-05	614	522	816	391	117	544
chr16	1780001	1790000	-1.11356	8.4559e-06	722	512	793	433	125	535
chr16	1810001	1820000	-1.32738	0.000185146	715	630	921	347	118	596
chr16	1820001	1830000	-1.32199	0.000148492	290	270	416	142	56	249
chr16	1830001	1840000	-1.17656	2.09596e-05	606	517	834	336	130	518
chr16	1840001	1850000	-1.36955	4.54698e-05	353	317	515	173	64	290
chr16	2020001	2030000	-1.24096	4.78532e-06	494	407	578	283	77	379
chr16	2050001	2060000	-1.24271	4.14985e-13	423	329	497	214	74	315
chr16	2080001	2090000	-1.22479	0.013561	370	374	574	254	58	373
chr16	2120001	2130000	-1.08952	1.83181e-17	816	756	1047	544	180	681
chr16	2130001	2140000	-1.34349	0.00229146	813	585	920	359	109	624
chr16	2140001	2150000	-1.26221	7.75539e-07	609	542	808	330	117	492
chr16	2150001	2160000	-1.4909	9.47515e-15	267	255	376	130	40	197
chr16	2160001	2170000	-1.54838	0.0145352	137	107	212	67	13	110
chr16	2220001	2230000	-1.40953	3.71347e-07	659	541	806	302	104	470
chr16	2230001	2240000	-1.11835	2.40473e-05	662	543	858	389	136	567
chr16	2280001	2290000	-1.26539	0.00108801	497	396	645	237	86	421
chr16	2750001	2760000	-1.20955	0.000231804	727	658	963	404	134	652
chr16	4430001	4440000	-1.10693	1.07833e-12	429	386	575	274	93	367
chr16	15010001	15020000	-1.91734	0.00853171	19	15	24	9	3	5
chr16	15020001	15030000	-1.39582	2.18649e-07	139	81	124	71	16	63
chr16	15220001	15230000	-1.43645	1.90826e-13	282	223	365	117	51	192
chr16	15230001	15240000	-1.83055	0.00553312	120	76	119	38	6	66
chr16	15410001	15420000	-2.26441	0.00677773	12	19	22	8	3	1
chr16	16410001	16420000	-1.41243	0.000285021	40	48	78	32	13	23
chr16	16420001	16430000	-1.81506	0.000232614	52	30	43	7	10	21
chr16	16580001	16590000	-1.27301	0.0262678	27	26	28	16	5	17
chr16	16710001	16720000	-1.65874	0.00266042	32	24	39	8	4	22
chr16	18460001	18470000	-1.41988	0.000162043	61	50	51	23	11	34
chr16	18470001	18480000	-2.04293	0.0117745	84	88	72	20	4	51
chr16	18480001	18490000	-4.19595	7.60649e-11	57	34	56	1	1	7
chr16	21850001	21860000	-1.11298	0.042651	32	21	48	16	11	23
chr16	22530001	22540000	-1.47403	0.0487651	18	29	14	11	2	13
chr16	28380001	28390000	-1.82502	0.0208633	14	19	20	4	2	11
chr16	28420001	28430000	-2.24786	0.0146777	8	27	14	3	4	4
chr16	28740001	28750000	-3.19016	6.76181e-05	23	17	25	3	1	4
chr16	29560001	29570000	-1.55839	0.000706228	31	34	49	19	7	17
chr16	30790001	30800000	-1.027	1.3983e-11	383	328	478	236	101	312
chr16	32210001	32220000	-2.70882	0.00144244	12	17	28	4	4	1
chr16	32330001	32340000	-1.13856	0.00268859	68	41	78	36	22	32
chr16	32450001	32460000	-1.04588	0.0392148	40	26	52	26	5	35
chr16	32480001	32490000	-1.07742	0.00121457	74	48	83	44	17	47
chr16	33480001	33490000	-1.01065	0.00297979	66	56	93	37	21	59
chr16	33560001	33570000	-1.14206	0.000277605	83	56	102	41	21	58
chr16	33570001	33580000	-1.02379	0.0376434	250	178	370	125	82	200
chr16	33810001	33820000	-2.46861	0.0151049	31	21	40	2	2	15
chr16	33850001	33860000	-1.17996	5.11131e-05	89	67	138	54	21	69
chr16	33930001	33940000	-1.00111	3.96491e-06	146	156	233	107	43	149
chr16	33960001	33970000	-1.92676	1.36977e-06	796	672	1307	250	110	462
chr16	34800001	34810000	-1.11517	5.10466e-07	129	118	169	85	28	104
chr16	52180001	52190000	-1.18309	0.0168238	42	23	46	25	7	23
chr16	56770001	56780000	-1.1897	5.11374e-08	144	126	173	75	35	106
chr16	70080001	70090000	-1.15543	1.54054e-05	97	119	119	78	15	83
chr16	70110001	70120000	-1.0291	0.0262781	31	43	56	23	11	37
chr16	70120001	70130000	-1.25717	0.00049442	49	71	61	32	16	36
chr16	70230001	70240000	-1.20479	1.06669e-06	121	104	182	72	25	102
[truncated: 214 more rows]

## Sheet: Table S5
Table S5. DMRs obtained from cfMeDIP-seq of patients with breast cancer and healthy individuals in validation cohort.
Chr	start	stop	log2 fold change	padj	cfDNA fragment counts for case samples
					H4	H5	H6	H7	H8	H9	H10	H11	P4	P5	P6	P7	P8	P9	P10	P11	P12	P13	P14
chr1	18960001	18970000	1.16307	0.00719963	4	9	5	4	2	7	6	12	10	15	21	16	31	17	20	19	6	14	61
chr1	48840001	48850000	1.01179	5.88517e-09	16	20	16	23	11	20	24	50	44	67	61	85	107	80	52	75	44	89	48
chr1	60810001	60820000	1.0114	0.00343693	9	2	3	9	5	2	17	19	15	25	32	20	52	23	35	22	8	25	20
chr1	74950001	74960000	1.00808	0.00453731	7	7	2	7	1	1	11	26	12	20	31	23	24	28	23	30	8	24	23
chr1	86680001	86690000	1.19927	5.78885e-09	9	20	9	6	10	11	18	36	26	65	52	50	78	64	43	62	27	55	43
chr1	93630001	93640000	1.6331	2.36339e-21	17	12	15	14	10	14	19	25	46	80	61	89	128	70	64	67	42	96	84
chr1	96130001	96140000	1.01665	1.27065e-11	26	25	16	23	18	27	39	63	36	100	89	104	119	85	95	91	55	112	108
chr1	102700001	102710000	1.29749	1.62677e-08	11	20	3	6	1	22	16	24	26	47	51	59	91	39	43	46	33	45	42
chr1	103310001	103320000	1.57292	3.07519e-12	7	5	5	6	8	12	19	17	29	53	41	58	63	42	37	39	22	57	52
chr1	104710001	104720000	1.13828	4.85303e-11	21	28	25	19	13	23	29	59	49	116	71	131	151	84	62	91	45	126	77
chr1	110930001	110940000	1.0464	1.69484e-11	18	56	13	38	22	36	36	83	65	136	106	158	162	111	89	125	65	139	119
chr1	146640001	146650000	1.02819	0.0104066	7	10	2	12	4	7	10	22	12	18	13	32	27	26	30	24	18	25	75
chr1	155050001	155060000	1.24752	8.1009e-05	9	7	2	3	3	14	6	9	15	14	20	26	37	22	21	29	19	30	30
chr1	165200001	165210000	1.13447	0.0044157	11	9	4	3	4	13	14	17	14	26	23	16	38	36	21	25	19	30	89
chr1	169300001	169310000	1.27985	1.9822e-07	21	13	11	19	11	14	20	26	38	69	53	56	85	50	41	60	34	69	136
chr1	174680001	174690000	1.12559	3.37222e-13	35	50	20	35	22	44	33	80	65	123	134	133	200	124	89	133	75	156	214
chr1	178880001	178890000	1.07693	0.00615219	2	3	0	3	4	10	8	15	6	21	18	16	17	22	17	14	14	20	27
chr1	187420001	187430000	1.25426	0.00109861	4	2	2	8	3	2	9	7	8	14	17	20	21	20	13	16	14	14	27
chr1	187580001	187590000	1.30189	1.05875e-20	42	52	29	44	25	47	41	72	91	166	163	194	251	160	118	156	79	191	273
chr1	187980001	187990000	1.0659	6.77516e-08	31	43	22	45	20	40	35	55	60	119	92	119	148	114	91	109	70	120	239
chr1	188780001	188790000	1.1479	3.72587e-10	29	33	23	18	20	29	36	55	55	109	83	108	161	89	83	91	55	109	192
chr1	188820001	188830000	1.12054	3.25216e-08	15	28	16	16	16	24	44	49	41	80	80	84	118	84	89	83	42	81	158
chr1	189680001	189690000	1.73843	3.88174e-16	10	15	14	12	13	8	19	35	35	89	71	88	129	56	60	68	47	110	132
chr1	190990001	191000000	1.58915	6.83541e-14	15	15	22	22	12	21	21	38	47	110	93	104	162	84	64	96	38	94	188
chr1	192770001	192780000	1.08108	0.0384764	2	6	2	2	7	10	7	9	7	15	17	13	16	22	18	12	8	13	62
chr1	192870001	192880000	1.004	0.00707438	4	10	1	3	5	1	7	17	7	12	16	22	22	23	21	18	12	17	26
chr1	196830001	196840000	1.05825	0.00608513	3	4	1	3	9	5	12	14	5	19	26	14	37	30	16	20	13	14	30
chr1	196900001	196910000	1.16979	0.000507496	12	17	32	25	15	21	26	40	32	125	79	52	107	68	77	85	44	92	167
chr1	197650001	197660000	1.11566	0.00137859	2	7	1	3	4	8	13	16	6	22	26	31	28	23	20	17	10	21	38
chr1	207540001	207550000	1.49437	0.0477823	19	18	10	12	13	44	5	40	5	74	133	69	166	95	45	4	45	137	245
chr1	213330001	213340000	1.23997	0.00028196	9	7	6	3	3	5	6	22	17	20	37	13	41	31	24	22	11	29	48
chr1	216170001	216180000	1.02596	0.0044511	3	5	5	9	3	5	4	13	9	11	21	21	28	27	16	15	9	15	29
chr1	216340001	216350000	1.11626	0.00348145	10	7	1	4	1	3	4	14	7	17	26	31	24	15	12	14	7	20	24
chr1	216910001	216920000	1.01134	0.00307497	6	7	2	7	3	2	8	18	10	22	21	18	31	19	19	17	6	25	33
chr1	219230001	219240000	1.04854	0.00233721	5	6	0	4	7	4	9	12	11	19	20	20	23	16	19	15	11	24	24
chr1	221890001	221900000	1.0414	0.00385901	8	3	1	4	2	5	10	17	13	24	18	25	25	15	16	13	16	18	24
chr1	222220001	222230000	1.16154	1.46013e-10	33	42	36	35	23	53	55	88	71	151	150	176	261	132	96	147	81	172	294
chr1	225610001	225620000	1.31839	7.37398e-10	24	29	30	24	17	37	30	50	61	104	117	130	173	101	76	102	58	116	256
chr1	228760001	228770000	2.12044	2.25933e-06	29	43	17	33	9	30	21	81	143	323	190	182	550	41	154	371	29	146	206
chr1	228770001	228780000	2.55343	1.22151e-05	16	6	17	13	0	26	15	48	86	295	108	121	413	121	17	74	45	198	255
chr1	228780001	228790000	1.03421	0.0231996	11	15	9	11	6	19	22	28	18	43	32	35	66	41	26	32	24	43	156
chr1	233540001	233550000	1.11614	0.00150886	7	3	2	6	1	7	7	13	13	22	13	23	20	18	22	15	12	22	24
chr1	249140001	249150000	1.12087	7.97296e-13	62	74	48	55	40	71	69	114	121	238	200	246	319	190	170	184	117	245	421
chr1	249150001	249160000	1.41744	5.1555e-06	5	14	2	5	6	10	10	21	17	27	30	34	42	39	33	29	20	43	83
chr2	5830001	5840000	1.15087	0.0365089	8	6	12	4	4	12	8	15	11	23	30	19	31	27	16	25	14	30	108
chr2	6720001	6730000	1.14879	0.00219086	6	4	4	3	0	7	12	18	17	16	20	39	44	24	29	16	9	18	12
chr2	15140001	15150000	1.40298	1.80301e-22	17	29	17	18	21	17	35	38	54	92	106	117	161	96	87	84	53	126	99
chr2	22620001	22630000	1.20903	0.00370466	3	10	0	0	3	6	8	9	10	10	16	22	24	28	12	27	11	13	12
chr2	30830001	30840000	1.0262	0.00126697	5	8	1	7	3	6	8	25	10	18	29	21	32	27	27	32	13	25	25
chr2	31700001	31710000	1.02067	0.00534629	6	3	2	9	2	3	6	14	11	18	12	19	20	26	16	20	9	22	15
chr2	34000001	34010000	1.28052	4.77416e-08	14	8	1	13	4	10	15	39	32	39	43	57	75	49	45	36	18	54	63
chr2	35210001	35220000	1.5002	4.12091e-10	8	10	8	14	8	10	14	27	22	67	41	63	76	42	49	41	25	64	97
chr2	38190001	38200000	1.06302	9.72312e-09	15	24	8	17	10	7	24	33	31	63	55	64	88	51	42	52	33	59	63
chr2	45160001	45170000	1.10703	0.000870623	7	9	3	7	3	4	9	9	11	23	20	30	31	20	13	16	21	28	175
chr2	50310001	50320000	1.35443	2.27967e-17	35	25	15	23	13	26	45	52	73	148	88	152	156	115	100	115	50	106	137
chr2	51250001	51260000	1.9232	3.06149e-25	25	29	34	13	13	17	39	57	94	211	118	177	251	147	107	174	93	205	223
chr2	51370001	51380000	1.17489	2.91741e-20	36	53	29	19	20	35	43	63	68	130	145	138	216	136	105	108	61	164	153
chr2	53580001	53590000	1.0084	2.10592e-08	30	28	36	11	12	12	30	53	45	84	72	84	128	85	75	86	46	93	98
chr2	57650001	57660000	1.04293	2.65879e-05	17	12	8	7	5	8	11	15	18	34	34	33	53	43	38	31	19	28	29
chr2	77110001	77120000	1.07748	0.000107638	11	6	5	8	3	7	9	18	16	19	25	27	47	29	18	33	18	32	31
chr2	77960001	77970000	1.07348	1.73808e-08	28	24	14	16	11	23	43	41	42	107	72	97	118	79	61	75	25	93	120
chr2	90480001	90490000	1.50954	1.62606e-06	3	9	1	6	6	2	6	14	17	23	21	30	42	34	24	33	13	27	14
chr2	96460001	96470000	1.23853	4.04733e-06	9	12	11	4	7	6	10	13	20	38	26	33	38	25	35	41	19	47	35
chr2	105480001	105490000	1.67652	0.0215854	4	6	1	3	1	2	6	12	7	18	14	14	15	22	17	6	5	10	89
chr2	108640001	108650000	1.00451	1.03328e-10	28	37	26	26	17	22	29	84	61	127	101	120	180	106	76	96	41	123	90
chr2	114150001	114160000	1.17645	4.05931e-07	19	19	3	14	10	15	12	30	31	59	48	80	101	79	37	43	15	56	37
chr2	125790001	125800000	1.57782	3.35072e-11	7	10	7	8	1	6	12	24	23	39	38	58	63	37	30	39	28	64	43
chr2	126170001	126180000	1.09947	0.000363085	4	4	1	10	10	7	22	24	21	32	44	38	55	48	31	31	11	24	29
chr2	126700001	126710000	1.25241	2.52285e-08	13	10	9	11	7	14	8	17	27	44	43	54	54	38	32	32	28	54	39
chr2	128110001	128120000	1.34944	1.09997e-22	29	26	23	19	13	26	40	42	58	112	100	121	160	112	84	104	64	144	111
chr2	132580001	132590000	1.28609	1.20732e-10	23	38	31	27	24	22	36	40	68	168	97	159	171	86	66	144	60	118	140
chr2	133000001	133010000	1.31508	9.18944e-15	10	17	15	21	9	27	30	61	45	103	98	96	130	102	70	88	49	84	102
chr2	144740001	144750000	1.14851	8.78314e-10	15	21	13	14	12	12	16	32	29	69	65	77	97	48	50	48	36	56	54
chr2	150170001	150180000	1.04645	1.97429e-06	16	13	17	7	15	15	33	44	27	66	59	90	82	70	39	63	35	69	91
chr2	151020001	151030000	1.13764	8.16662e-10	9	17	16	12	15	13	30	45	38	75	58	74	112	72	44	69	34	86	61
chr2	162930001	162940000	1.01036	0.0159711	7	6	4	2	6	5	11	19	8	11	21	22	23	22	20	21	15	22	60
chr2	163090001	163100000	1.09844	1.35164e-10	16	39	32	28	13	24	49	84	72	137	106	133	178	103	78	102	64	138	134
chr2	164760001	164770000	1.10232	2.46196e-14	39	41	36	40	25	20	44	73	81	149	128	157	184	143	78	135	65	156	162
chr2	168420001	168430000	2.0353	7.25453e-26	7	12	13	8	9	15	14	33	44	112	95	115	113	87	58	79	48	91	103
chr2	171670001	171680000	1.17034	0.0180936	4	14	4	5	6	11	17	16	11	35	27	22	27	35	21	28	18	30	102
chr2	177010001	177020000	1.15807	0.0203815	12	16	7	9	3	16	11	31	12	38	20	44	51	31	32	28	25	42	146
chr2	177870001	177880000	1.92207	9.24231e-24	12	13	11	10	7	16	24	33	68	100	75	92	115	86	61	93	57	108	117
chr2	178810001	178820000	1.0766	4.3974e-08	16	23	11	19	10	23	25	39	46	82	38	86	103	71	44	86	30	74	69
chr2	184750001	184760000	1.46128	5.74323e-23	15	24	15	17	18	15	29	52	49	100	99	124	144	98	85	99	62	101	98
chr2	185680001	185690000	1.01225	0.00531277	3	5	2	8	3	7	6	15	14	15	22	25	33	23	26	11	7	16	13
chr2	188030001	188040000	1.06526	0.00079342	5	4	3	8	2	13	6	13	12	18	24	23	37	25	23	18	16	23	17
chr2	198650001	198660000	1.06701	1.31076e-15	32	61	36	33	23	32	50	84	74	144	125	180	190	144	112	138	67	172	193
chr2	198780001	198790000	1.12049	4.00549e-14	35	28	18	28	9	32	30	43	51	94	100	130	134	99	63	78	54	111	106
chr2	200320001	200330000	1.11608	0.00714732	2	4	5	6	3	4	3	13	9	19	14	12	22	28	17	10	18	14	135
chr2	201030001	201040000	1.19496	2.08924e-11	12	31	7	27	14	12	41	59	38	99	89	89	133	81	75	94	47	105	100
chr2	207260001	207270000	1.24342	8.34283e-13	18	15	9	22	11	17	33	57	50	85	71	90	141	96	53	67	48	103	81
chr2	223170001	223180000	2.09816	0.0214863	3	2	3	3	2	1	1	18	12	19	10	8	15	16	9	8	11	9	140
chr2	230710001	230720000	1.09696	3.6457e-12	24	31	16	14	12	27	49	50	49	103	89	105	140	86	67	101	38	118	103
chr2	231250001	231260000	1.03644	0.00388731	6	7	3	3	3	2	9	15	15	20	26	26	21	20	11	14	10	18	20
chr2	231820001	231830000	1.71983	1.44884e-23	19	13	20	14	15	17	45	51	78	154	115	153	155	130	93	118	56	147	124
chr3	230001	240000	1.19741	0.000532527	9	11	10	13	1	14	12	27	27	22	62	47	50	65	23	21	15	38	86
chr3	520001	530000	1.36621	2.07085e-10	9	11	11	9	8	6	17	28	20	49	48	62	89	39	35	54	34	54	51
chr3	2520001	2530000	1.05489	1.29927e-11	18	28	14	19	16	37	35	73	51	94	76	123	138	102	73	95	54	123	96
chr3	7610001	7620000	1.00154	3.44908e-11	41	31	14	27	23	28	53	49	58	131	96	131	159	114	78	97	59	112	87
chr3	17740001	17750000	1.23136	3.16288e-15	19	31	16	21	16	27	40	46	46	128	85	121	141	80	86	90	55	117	114
chr3	17850001	17860000	1.04621	3.10069e-19	40	66	35	40	34	50	50	105	106	189	166	208	240	158	122	163	81	202	173
chr3	19270001	19280000	1.32015	8.37611e-13	13	23	24	14	13	11	36	31	43	86	69	107	127	93	56	65	55	88	86
chr3	28940001	28950000	1.36218	9.81306e-19	17	29	18	13	10	22	25	59	55	105	81	103	135	102	86	86	62	102	99
chr3	34400001	34410000	1.09511	0.00255356	3	7	1	7	2	2	12	19	17	11	22	25	25	31	22	23	12	21	16
chr3	35030001	35040000	1.13241	1.58352e-08	13	20	9	6	11	22	18	27	31	60	61	66	80	51	33	43	24	72	62
chr3	39820001	39830000	1.31413	5.89399e-17	28	15	12	19	12	21	28	53	45	94	91	107	113	107	97	81	44	87	100
chr3	40110001	40120000	1.27398	1.53286e-18	21	30	15	29	18	28	37	57	45	119	116	149	160	88	94	118	57	120	125
chr3	41880001	41890000	1.32172	1.04125e-25	43	56	40	51	33	52	50	62	111	218	171	226	282	169	148	169	111	241	226
chr3	42570001	42580000	1.19028	3.72125e-15	20	37	19	16	5	22	34	52	52	91	93	106	133	104	65	73	49	107	97
chr3	42810001	42820000	1.01605	2.27628e-10	37	40	19	36	16	35	51	82	71	122	111	140	149	129	85	106	60	134	198
chr3	45340001	45350000	1.1925	9.9151e-18	42	24	30	37	20	29	43	75	76	150	132	160	176	122	104	129	60	151	173
chr3	56960001	56970000	1.09975	8.34404e-09	22	26	22	27	5	22	32	57	51	115	100	89	133	63	52	101	50	97	82
chr3	59030001	59040000	1.28638	4.93835e-15	14	22	14	14	9	15	20	50	44	66	62	84	112	79	67	80	34	88	83
chr3	61420001	61430000	1.2839	3.30904e-13	15	14	11	10	10	14	30	37	25	66	71	71	108	66	65	60	43	72	70
chr3	67780001	67790000	1.02047	0.00554294	4	6	2	5	4	3	7	13	9	14	18	26	24	13	20	15	14	15	16
chr3	68830001	68840000	1.40662	2.16441e-10	15	10	11	12	10	25	28	35	46	96	67	83	119	85	50	91	41	92	36
chr3	82540001	82550000	1.08836	0.000763358	9	5	4	4	2	5	12	16	12	28	29	25	49	23	12	22	14	20	19
chr3	84960001	84970000	1.08972	1.08365e-08	15	24	21	21	13	16	17	41	27	99	75	70	109	58	61	58	36	75	89
chr3	86780001	86790000	1.53845	9.24231e-24	26	31	21	25	23	42	36	82	84	188	149	185	221	146	103	140	77	212	218
chr3	105230001	105240000	1.27713	6.86304e-05	9	7	1	3	1	2	10	23	13	18	34	32	33	30	25	22	12	31	23
chr3	114530001	114540000	1.0695	3.68122e-09	23	19	15	17	5	21	38	42	38	94	64	77	117	78	50	75	37	67	89
chr3	118140001	118150000	1.06421	0.00320777	2	4	2	7	2	5	9	20	12	24	25	19	38	22	20	18	8	22	10
chr3	125670001	125680000	1.22385	8.10934e-23	33	49	49	29	26	44	52	95	92	187	186	195	277	180	126	159	98	196	155
chr3	132130001	132140000	1.22965	0.000128397	4	8	1	6	4	1	8	22	16	14	24	24	33	29	23	24	14	31	24
chr3	132880001	132890000	1.21873	3.72125e-15	22	32	17	19	10	15	24	47	37	93	70	109	132	87	72	72	48	109	78
chr3	142840001	142850000	1.12033	7.0202e-19	40	47	29	39	29	48	47	75	87	187	133	171	208	164	102	136	80	172	178
chr3	146490001	146500000	1.08533	3.41563e-15	32	27	17	28	18	30	25	46	46	95	86	104	144	90	81	93	48	103	109
chr3	147700001	147710000	1.22554	6.22604e-16	29	36	24	26	16	38	32	59	64	160	108	165	145	115	88	105	59	127	134
chr3	151930001	151940000	1.28693	1.12024e-16	23	28	12	24	14	23	32	55	58	106	88	131	132	98	66	102	49	103	132
chr3	155790001	155800000	1.08331	3.11106e-10	17	15	13	18	15	19	23	49	34	62	64	58	113	85	57	75	45	77	75
chr3	155940001	155950000	1.21746	3.67469e-14	32	32	21	16	11	17	23	67	53	113	94	107	140	84	71	100	54	110	117
chr3	165360001	165370000	1.09289	5.88517e-09	15	19	8	8	12	27	23	36	36	68	55	66	85	55	45	54	38	77	76
chr3	166140001	166150000	1.24998	5.96397e-11	17	24	17	10	4	20	21	42	35	90	70	82	123	68	58	45	48	82	62
chr3	166560001	166570000	1.25996	4.57053e-10	11	19	17	10	5	13	17	31	37	67	45	75	72	50	45	51	28	67	75
chr3	166690001	166700000	1.47517	2.37683e-10	9	15	5	16	4	6	7	22	24	39	35	61	69	47	32	40	18	71	55
chr3	167990001	168000000	1.01041	0.00521586	8	6	2	5	1	3	11	16	12	16	16	30	31	25	20	23	4	29	11
chr3	168490001	168500000	1.02793	5.3812e-10	41	23	8	19	11	21	31	58	41	61	83	105	145	78	77	84	42	104	78
chr3	173930001	173940000	1.3772	1.4737e-05	5	7	5	2	2	2	10	21	15	17	24	33	36	25	17	26	21	34	35
chr3	176080001	176090000	1.32775	6.16616e-08	7	9	3	7	4	6	23	28	24	38	44	36	59	40	39	38	21	47	58
chr3	178830001	178840000	1.73155	1.74008e-21	11	23	13	15	13	19	19	31	48	129	105	119	133	72	67	78	56	97	99
chr3	189930001	189940000	1.01335	0.00659385	3	5	2	3	4	5	11	22	9	17	19	29	38	31	20	17	4	32	14
chr4	1400001	1410000	1.01384	4.54257e-08	46	56	53	49	30	50	44	106	86	150	173	193	253	153	113	158	81	175	335
chr4	8870001	8880000	1.37993	0.026475	5	9	4	12	5	11	23	21	23	29	22	46	25	35	22	27	20	31	187
chr4	12610001	12620000	1.09325	1.08363e-06	12	15	7	10	9	12	33	58	28	73	61	70	86	59	47	61	34	64	79
chr4	15650001	15660000	1.18335	5.65997e-05	7	7	3	5	2	9	12	17	12	19	26	21	47	28	20	25	18	41	36
chr4	17760001	17770000	1.00706	5.15922e-10	30	33	13	17	19	21	27	64	51	70	63	86	139	93	78	94	43	101	114
chr4	18420001	18430000	1.67113	3.23142e-12	13	5	2	9	6	8	15	26	29	51	43	63	61	47	42	45	30	50	83
chr4	22780001	22790000	1.15625	5.88142e-12	15	22	13	14	7	21	28	38	43	66	65	74	90	62	66	75	37	85	67
chr4	29040001	29050000	1.26228	1.41408e-14	20	16	18	12	13	25	32	29	37	80	70	87	128	77	61	73	51	88	88
chr4	29110001	29120000	1.37158	3.69544e-12	11	25	11	13	5	15	17	36	35	80	70	62	95	60	43	60	36	72	96
chr4	34500001	34510000	1.01878	1.45565e-07	14	11	17	15	6	11	25	31	31	42	55	61	75	56	46	59	24	52	51
chr4	36370001	36380000	1.54013	1.07245e-17	13	22	8	21	9	11	35	44	41	93	83	103	112	92	77	81	71	103	104
chr4	37320001	37330000	1.05253	0.00581573	3	2	1	6	3	5	13	14	14	7	22	20	25	21	23	20	8	18	21
chr4	43840001	43850000	1.17288	3.01973e-10	15	24	11	11	14	16	19	42	28	62	69	79	94	79	48	60	33	64	100
chr4	44170001	44180000	1.36615	1.41104e-07	7	7	2	7	4	9	14	14	18	34	34	42	46	25	31	33	14	32	36
chr4	45420001	45430000	1.12424	8.47156e-07	9	17	7	8	7	5	17	35	24	27	48	45	61	58	37	45	24	55	45
chr4	46250001	46260000	1.08022	0.0045852	3	2	3	5	2	3	6	18	12	15	18	15	25	23	15	17	11	16	13
chr4	46380001	46390000	1.35503	1.58247e-06	6	8	2	6	1	8	11	17	15	37	22	35	46	27	21	23	15	33	39
chr4	47380001	47390000	1.10558	4.95508e-11	19	37	27	21	21	26	40	39	54	112	83	121	127	75	93	94	48	123	126
chr4	49270001	49280000	2.04414	7.69685e-21	6	13	7	11	12	19	16	27	39	87	65	80	160	85	52	96	62	104	135
chr4	53210001	53220000	1.09481	0.00459763	0	5	7	6	0	3	11	14	10	10	24	16	21	22	19	21	11	30	17
chr4	53330001	53340000	1.11765	1.11e-09	18	26	20	11	13	14	21	26	30	60	56	83	102	61	52	52	34	74	88
chr4	55090001	55100000	1.03067	0.000532376	8	10	7	5	3	3	15	24	10	32	30	37	40	27	22	24	28	38	213
chr4	55850001	55860000	1.59065	1.55549e-18	19	19	8	17	10	17	17	22	41	91	61	78	108	61	64	77	43	99	95
chr4	56100001	56110000	1.21954	2.98497e-05	5	4	7	4	3	10	11	18	15	22	28	26	30	35	34	25	16	41	26
chr4	58160001	58170000	1.22836	3.24244e-10	19	18	18	9	11	28	30	52	32	77	90	72	136	89	61	66	44	128	114
chr4	58590001	58600000	1.50242	1.82101e-14	19	11	9	10	11	6	15	53	39	74	74	84	110	67	56	80	36	73	78
chr4	64210001	64220000	1.04676	2.03762e-15	39	52	31	36	28	45	53	66	83	160	117	140	190	154	104	135	83	175	180
chr4	64800001	64810000	1.17029	7.71851e-09	24	16	10	11	5	13	17	36	27	64	46	66	94	49	38	65	36	56	74
chr4	67760001	67770000	1.05604	4.01502e-09	15	23	9	27	9	7	25	41	41	54	52	79	90	71	54	55	33	77	66
chr4	69090001	69100000	1.05966	0.00167067	7	8	2	2	3	5	12	19	18	19	26	22	32	35	16	14	7	27	31
chr4	70780001	70790000	1.51995	7.07127e-21	19	25	8	11	13	19	30	44	48	110	83	117	149	79	84	83	42	100	116
chr4	75260001	75270000	1.30546	5.18592e-11	20	20	18	18	9	31	39	49	56	97	82	163	135	85	76	87	36	88	149
chr4	77830001	77840000	1.0389	5.47614e-08	18	49	17	31	24	21	32	49	32	139	93	106	154	114	86	117	44	81	94
chr4	78480001	78490000	1.14512	2.11127e-14	18	31	15	21	17	28	50	60	53	118	107	131	153	92	104	85	48	109	104
chr4	78490001	78500000	1.07396	8.85015e-15	19	26	24	21	17	27	35	53	50	97	90	100	137	99	82	89	48	103	86
chr4	80040001	80050000	1.2409	7.49347e-20	29	24	28	30	15	27	35	60	62	121	124	132	182	108	84	94	63	126	136
chr4	84880001	84890000	1.06118	0.0014243	4	10	1	7	0	3	10	20	11	20	22	24	31	25	18	21	17	18	24
chr4	97440001	97450000	1.02323	1.19875e-08	14	24	7	15	7	19	41	51	32	67	75	84	112	75	57	60	32	86	67
chr4	107010001	107020000	1.21838	2.81888e-12	26	35	25	13	8	26	30	64	47	121	109	118	157	100	58	84	57	111	129
chr4	110590001	110600000	1.11467	9.34622e-18	43	35	27	27	12	36	45	63	68	135	122	136	199	125	81	120	65	128	130
chr4	116120001	116130000	1.08243	1.71379e-12	26	31	16	14	9	18	27	50	45	80	74	96	117	88	55	77	38	89	84
chr4	116590001	116600000	1.31753	4.6898e-14	17	14	12	22	14	20	30	46	45	90	82	112	118	95	43	82	43	96	105
chr4	119450001	119460000	1.01999	0.000297695	13	4	4	7	2	11	12	19	25	27	26	31	47	27	19	26	18	32	23
chr4	120000001	120010000	1.21707	0.00176095	0	4	2	8	2	6	10	6	9	11	19	20	21	24	23	12	11	21	14
chr4	121730001	121740000	1.20068	1.28157e-08	21	23	8	10	12	9	12	15	34	55	45	64	68	45	44	57	22	55	47
chr4	122300001	122310000	1.01036	0.0346591	9	19	2	5	8	16	17	25	21	24	29	32	32	36	29	37	20	32	111
chr4	123300001	123310000	1.39233	1.88065e-20	42	35	23	24	15	38	41	76	86	179	141	185	217	144	100	114	72	150	208
chr4	123590001	123600000	1.01815	1.30121e-13	21	38	26	34	34	30	43	71	75	120	110	149	178	105	97	107	55	131	141
chr4	124030001	124040000	1.06056	4.34443e-11	18	36	19	24	28	38	30	62	63	117	78	133	183	104	68	89	60	123	106
chr4	138770001	138780000	1.05964	7.69439e-08	19	16	12	15	11	25	24	30	26	75	44	72	103	62	45	53	33	69	93
chr4	142130001	142140000	1.0077	9.49569e-09	22	30	10	20	16	34	48	46	44	96	74	117	142	74	57	79	51	123	98
chr4	147550001	147560000	1.39453	0.0397213	3	4	2	6	4	4	16	9	13	17	13	15	30	22	10	9	15	18	98
chr4	154720001	154730000	1.69287	7.25453e-26	26	15	6	22	13	14	29	38	75	111	93	115	136	108	83	87	46	128	111
chr4	155960001	155970000	1.02485	1.38928e-06	13	22	11	13	6	15	17	45	26	55	38	55	67	58	54	61	44	71	53
chr4	155980001	155990000	1.02419	0.0104324	4	3	1	6	0	7	7	17	10	11	23	15	23	19	25	12	6	25	16
chr4	158960001	158970000	1.4358	1.76807e-21	23	18	16	12	24	18	32	51	57	116	93	112	150	100	84	100	54	111	121
chr4	160790001	160800000	1.33362	5.61452e-13	15	24	15	26	8	13	40	37	39	104	67	93	122	77	70	89	52	99	122
chr4	161400001	161410000	1.24008	2.19584e-18	27	39	14	39	20	28	55	64	60	136	115	154	176	115	115	146	81	140	160
chr4	161470001	161480000	1.14947	4.41792e-08	11	16	15	11	8	21	13	45	42	58	58	56	94	47	46	58	23	76	83
chr4	164070001	164080000	1.21225	2.46884e-12	19	12	12	17	7	21	30	27	30	72	71	70	104	63	66	60	37	69	66
chr4	164980001	164990000	1.08983	5.30072e-09	14	23	5	14	11	17	29	47	28	69	49	72	100	75	51	64	42	92	59
chr4	166720001	166730000	1.30424	1.1344e-10	5	18	12	7	14	13	18	28	26	67	54	57	75	62	38	50	34	67	66
chr4	167280001	167290000	1.44185	0.00065843	5	0	2	4	1	2	6	16	11	13	16	22	29	28	11	26	12	9	18
chr4	190940001	190950000	2.71215	1.02024e-36	7	18	18	10	15	18	13	18	70	158	168	209	148	159	93	184	93	178	199
chr4	191000001	191010000	2.3721	3.21473e-10	8	11	9	50	4	23	8	20	83	128	95	151	158	141	124	101	73	184	231
chr5	3590001	3600000	1.06323	0.00414825	5	5	3	5	2	4	10	18	9	28	21	23	22	16	16	19	23	23	396
chr5	4830001	4840000	1.03849	3.24764e-06	16	21	9	10	9	20	38	32	24	62	73	95	104	57	43	48	39	82	43
chr5	9720001	9730000	1.52153	6.88982e-23	13	35	11	18	11	20	26	42	58	88	95	120	156	96	73	85	49	109	127
chr5	12570001	12580000	1.50585	3.40259e-21	19	26	31	23	16	18	29	47	72	132	95	141	157	105	84	110	62	144	149
chr5	13240001	13250000	1.00979	1.86e-09	28	16	15	15	13	19	41	45	40	67	86	93	108	72	64	59	36	95	90
chr5	14990001	15000000	1.17549	1.10281e-05	7	17	8	9	10	13	21	24	29	32	41	49	55	45	39	43	25	53	100
chr5	16270001	16280000	1.09394	8.53235e-10	15	25	9	20	14	27	19	43	48	76	61	58	107	72	55	76	35	79	95
chr5	18310001	18320000	1.12683	2.09217e-05	10	8	6	11	6	10	10	49	19	31	46	53	61	43	42	40	22	55	66
chr5	25200001	25210000	1.40216	3.80581e-14	16	15	5	11	7	13	20	33	31	64	61	63	104	64	60	45	29	65	76
chr5	28430001	28440000	1.00103	0.0016137	6	6	3	7	3	5	7	19	10	16	23	23	35	31	15	22	11	23	24
chr5	28670001	28680000	1.15202	0.00134899	6	2	5	7	1	1	9	15	10	14	15	24	30	31	14	20	13	16	24
chr5	42830001	42840000	1.00195	1.84377e-10	18	33	19	26	14	35	36	72	65	99	92	113	154	109	81	75	43	88	126
chr5	43660001	43670000	1.13075	1.87144e-12	16	33	17	19	11	18	22	44	43	91	80	84	106	77	60	68	50	85	74
chr5	45730001	45740000	1.02933	0.00744292	11	2	4	1	3	5	6	12	8	10	16	25	25	14	16	17	9	19	29
chr5	49760001	49770000	1.22598	1.51001e-12	13	22	21	11	10	14	20	49	37	75	73	89	116	70	56	86	31	77	72
chr5	49900001	49910000	1.27761	2.19294e-17	22	30	25	14	17	26	38	62	65	113	106	134	172	94	74	125	51	130	122
chr5	54520001	54530000	1.05515	0.0132144	1	10	1	5	1	7	10	13	7	17	24	13	26	19	11	13	14	17	40
chr5	59710001	59720000	1.14695	2.36554e-10	13	26	12	11	8	17	23	41	37	64	64	59	87	63	46	72	36	86	76
chr5	62300001	62310000	1.2927	4.33448e-12	10	16	15	12	12	11	19	37	34	71	62	71	120	58	49	46	32	69	70
chr5	63440001	63450000	1.01375	5.54019e-12	17	34	29	18	22	28	39	45	46	95	101	90	147	101	79	88	45	116	91
chr5	63450001	63460000	1.01886	0.00678035	4	4	1	8	0	8	6	26	7	19	25	21	34	23	24	25	15	16	18
chr5	63520001	63530000	1.54299	5.98914e-22	19	18	21	14	14	19	34	46	61	126	88	97	163	104	84	122	46	121	119
chr5	64330001	64340000	1.34135	5.73206e-13	14	14	6	15	8	14	24	36	34	60	66	82	91	75	49	55	29	98	53
chr5	73200001	73210000	1.03188	2.69964e-09	29	35	8	17	10	27	16	35	35	60	76	85	96	68	67	70	49	70	76
chr5	75380001	75390000	1.03033	0.012951	7	4	4	2	3	7	18	24	15	21	18	29	27	20	26	16	21	21	57
chr5	76010001	76020000	1.2377	0.00329903	9	4	4	6	6	8	11	16	12	17	24	33	27	20	25	19	17	26	92
chr5	80440001	80450000	1.06788	0.00402354	6	5	2	1	4	4	9	11	8	16	12	22	34	15	21	17	9	17	14
chr5	82380001	82390000	1.04196	0.0117307	4	4	2	4	2	2	6	21	8	13	19	11	33	27	16	9	11	20	19
chr5	83720001	83730000	1.13859	0.00175952	3	2	2	4	1	9	7	16	8	18	17	22	22	25	20	14	8	20	25
chr5	85760001	85770000	1.1393	1.21101e-11	14	15	14	20	13	18	27	40	38	70	54	89	101	71	57	67	34	76	87
chr5	90140001	90150000	1.19094	1.52703e-14	22	14	15	25	15	30	36	50	50	109	85	112	139	86	67	86	42	108	109
chr5	90770001	90780000	1.0299	0.000508701	9	7	4	8	4	10	9	9	18	22	25	23	33	26	17	29	15	26	23
chr5	91960001	91970000	1.37438	3.05115e-13	12	16	13	12	8	18	15	32	36	82	65	71	94	52	45	63	33	64	77
chr5	94600001	94610000	1.1175	0.00245871	5	3	1	6	0	6	10	13	12	16	21	18	27	31	16	13	10	19	13
chr5	96420001	96430000	1.37825	2.78132e-14	20	20	7	19	9	14	25	38	46	80	57	81	122	74	50	79	41	79	110
chr5	100020001	100030000	1.03391	1.03328e-10	28	27	27	21	20	18	31	51	55	87	82	83	131	94	67	77	48	112	126
chr5	102080001	102090000	1.7054	7.22662e-18	24	18	13	10	8	11	28	36	61	135	71	98	126	90	73	66	44	107	123
chr5	105480001	105490000	1.25293	4.63749e-05	5	4	2	4	3	6	13	20	15	20	23	33	41	25	20	20	10	41	33
chr5	105750001	105760000	1.05644	2.66749e-07	13	14	9	14	11	13	16	28	23	61	49	57	74	51	40	37	19	44	63
chr5	112950001	112960000	1.14103	4.97381e-15	32	42	18	24	18	27	46	72	70	120	109	129	174	126	87	96	48	154	166
chr5	114340001	114350000	1.01809	0.0223286	4	3	1	3	2	2	17	26	23	14	19	27	27	19	19	16	10	28	17
chr5	117360001	117370000	1.46352	7.16663e-18	12	14	12	16	13	18	28	45	49	83	77	96	126	83	66	76	45	84	119
chr5	117540001	117550000	1.66595	5.18022e-24	17	14	12	17	11	11	22	49	45	78	93	115	145	96	83	70	50	123	112
chr5	118340001	118350000	1.01495	1.07778e-09	25	16	13	23	18	21	20	52	39	75	73	86	107	61	60	76	40	79	96
chr5	126900001	126910000	1.86094	2.42501e-10	4	13	0	5	0	9	12	16	23	51	39	45	59	35	25	33	26	31	64
chr5	140160001	140170000	1.17615	5.32081e-07	30	34	17	36	17	23	38	60	47	124	79	128	154	111	57	79	57	125	247
chr5	140170001	140180000	1.00225	1.27227e-05	33	43	36	41	39	38	36	58	67	159	114	146	176	128	69	114	68	124	270
chr5	140180001	140190000	1.28548	1.64189e-07	48	57	56	45	38	78	68	119	106	301	201	276	347	198	140	191	141	240	508
chr5	140200001	140210000	1.27396	2.42553e-05	22	58	25	41	26	56	48	62	87	208	116	176	203	115	107	102	97	143	363
chr5	140210001	140220000	1.06706	0.00131816	16	19	28	25	23	24	34	46	38	76	92	96	124	82	44	77	52	94	218
chr5	140220001	140230000	1.10242	9.33629e-05	33	57	29	50	27	74	50	70	76	183	151	182	225	140	92	133	79	157	385
chr5	140230001	140240000	1.57537	4.18578e-13	26	40	20	34	16	46	31	60	81	182	112	192	209	127	110	114	77	152	347
chr5	140250001	140260000	1.34327	2.85814e-06	33	65	35	37	33	45	37	62	81	219	143	174	240	167	82	144	106	155	403
chr5	140260001	140270000	1.71677	5.99716e-13	20	29	11	20	9	25	25	51	52	143	84	109	136	90	79	104	64	131	269
chr5	140560001	140570000	1.20621	0.00249991	9	27	14	22	28	17	16	33	35	76	47	82	88	109	46	67	36	73	202
chr5	140590001	140600000	1.45154	2.71226e-07	8	10	12	14	10	13	20	30	26	60	48	65	78	59	30	51	34	77	147
chr5	140600001	140610000	1.1386	0.000963298	9	7	2	10	4	18	8	22	24	30	43	44	40	28	17	22	14	27	69
chr5	140610001	140620000	1.05661	0.00919873	12	22	7	19	9	18	13	24	23	40	44	51	49	44	35	37	26	39	151
chr5	162040001	162050000	1.5678	1.73603e-17	14	10	19	16	8	16	18	46	40	95	67	121	128	84	62	80	45	82	104
chr5	171330001	171340000	1.01783	0.000785757	7	9	5	3	3	6	10	15	11	17	18	26	34	24	26	21	14	28	26
chr6	1390001	1400000	1.03396	0.0210098	25	20	12	20	4	18	32	41	28	59	59	66	61	44	42	43	37	53	209
chr6	4190001	4200000	1.08034	8.49853e-14	25	44	24	27	22	30	57	55	64	124	120	145	152	113	98	89	62	146	149
chr6	7310001	7320000	1.09906	1.15143e-13	59	67	28	36	20	41	34	76	82	152	151	164	175	141	127	134	93	162	212
chr6	12010001	12020000	1.10326	2.42788e-12	28	37	33	39	16	60	45	80	85	188	122	159	184	126	101	131	81	169	155
chr6	20230001	20240000	1.03434	7.46523e-18	59	83	33	75	38	78	83	120	95	271	192	261	375	227	181	195	120	248	299
chr6	20310001	20320000	1.36975	1.11351e-15	27	31	18	16	6	22	30	63	44	108	89	123	156	93	82	95	57	123	159
chr6	22310001	22320000	1.1152	1.55027e-11	19	28	18	20	16	26	28	57	57	79	90	133	135	112	53	81	39	85	96
chr6	24930001	24940000	1.04152	0.00162126	9	8	10	3	0	9	10	15	14	31	30	22	40	42	19	11	9	29	31
chr6	28470001	28480000	1.31551	4.43738e-13	15	13	14	14	11	17	21	23	31	74	59	73	98	76	42	57	36	76	55
chr6	31420001	31430000	1.37215	0.000870633	20	5	25	19	12	17	10	19	33	111	79	121	82	63	78	57	18	98	36
chr6	38090001	38100000	1.05088	1.52703e-14	35	32	28	22	18	35	49	59	62	100	100	130	204	135	86	103	53	115	136
chr6	51270001	51280000	1.12368	1.46708e-05	17	22	4	11	10	7	24	24	23	57	51	50	83	47	28	40	19	58	93
chr6	55770001	55780000	1.39737	6.67414e-14	17	36	18	19	22	34	21	28	37	131	97	108	137	102	86	111	72	105	120
chr6	66490001	66500000	1.14341	9.87569e-10	23	18	15	23	21	13	34	58	42	93	58	107	120	100	72	71	50	97	130
chr6	66700001	66710000	1.11846	3.16288e-15	22	43	8	25	19	31	43	52	45	97	99	123	160	107	85	91	56	114	130
chr6	67650001	67660000	1.74051	6.76456e-20	13	12	14	17	7	16	22	32	35	107	68	114	116	75	67	87	38	109	122
chr6	68530001	68540000	1.21802	8.04777e-13	21	27	12	10	9	22	33	38	32	76	62	87	117	96	60	75	40	89	106
chr6	71870001	71880000	1.18441	8.99605e-06	8	5	1	11	6	5	20	24	20	26	32	46	50	35	22	35	25	45	36
chr6	74700001	74710000	1.93472	1.30295e-15	5	12	1	6	3	5	15	28	23	51	52	57	84	53	55	50	23	55	82
chr6	84590001	84600000	1.02682	0.00450031	5	3	2	8	4	4	4	15	8	15	20	25	23	22	13	23	7	19	16
chr6	84950001	84960000	1.09134	3.7202e-10	20	21	15	15	9	25	21	37	38	56	60	99	104	73	46	75	36	65	78
chr6	86990001	87000000	1.19698	1.28122e-07	7	13	14	10	7	8	10	30	18	37	34	59	69	36	40	51	29	50	51
chr6	87710001	87720000	1.1338	0.000213335	8	10	4	4	5	5	12	13	15	19	26	33	44	24	13	22	26	27	29
chr6	88870001	88880000	1.11802	0.0335106	4	10	2	9	5	4	13	23	10	21	24	23	41	29	22	13	9	27	89
chr6	93430001	93440000	1.28352	3.70792e-12	28	26	13	26	9	26	42	60	73	133	85	106	138	95	64	88	60	140	146
chr6	94010001	94020000	1.31012	0.000649484	2	5	2	2	2	4	8	12	8	22	12	20	22	18	25	17	13	17	13
chr6	96110001	96120000	1.38574	1.05537e-13	17	17	11	13	5	13	18	47	30	65	73	101	100	68	53	78	31	73	88
chr6	97880001	97890000	1.29797	9.38429e-05	7	14	3	6	2	0	3	12	8	23	19	31	36	30	23	21	8	24	20
chr6	99590001	99600000	1.02629	3.21763e-06	12	13	6	10	8	15	17	34	24	38	46	56	77	35	53	50	25	49	32
chr6	100910001	100920000	1.11347	0.0117978	1	2	0	3	3	7	10	16	11	16	13	16	24	22	9	11	19	24	221
chr6	106710001	106720000	1.24991	3.37991e-13	27	19	10	19	5	15	30	59	46	98	81	97	114	72	85	82	38	95	80
chr6	108490001	108500000	1.22398	0.000839178	3	6	5	6	4	7	7	18	18	28	29	18	33	20	15	21	32	24	335
chr6	117330001	117340000	1.22328	4.20845e-11	17	26	20	16	17	17	21	30	44	81	57	93	119	79	45	77	37	80	110
chr6	125360001	125370000	1.1373	0.00699497	0	5	4	3	0	4	9	25	10	12	20	26	33	13	25	21	14	23	15
chr6	128190001	128200000	1.06295	0.00329386	4	7	1	7	2	3	6	19	15	13	15	19	27	24	16	24	14	16	22
chr6	129400001	129410000	1.12866	4.68248e-10	17	19	14	15	19	7	21	32	36	72	50	80	97	60	50	59	27	73	64
chr6	134210001	134220000	1.00143	0.0377837	5	6	5	6	0	5	13	19	14	19	14	14	17	27	16	16	8	21	65
chr6	134950001	134960000	1.16208	8.2923e-11	21	23	14	7	11	20	26	41	45	70	74	79	108	58	58	67	28	75	99
chr6	141930001	141940000	1.76549	1.0364e-13	7	9	8	10	7	5	11	19	16	59	45	57	81	44	40	58	18	57	76
chr6	145120001	145130000	1.02163	0.00210465	2	4	2	8	7	8	9	12	10	18	27	25	27	28	15	18	9	29	17
chr6	162760001	162770000	1.18668	2.848e-11	16	22	13	16	7	20	13	41	26	78	70	67	101	73	71	62	24	69	65
chr6	165410001	165420000	1.00454	2.91886e-11	31	21	21	21	18	20	36	51	55	71	96	96	135	71	80	88	44	92	93
chr6	169870001	169880000	1.07534	0.0108372	4	4	1	6	0	3	7	27	7	16	18	22	38	28	19	15	13	12	24
chr7	2560001	2570000	1.11448	1.05875e-20	91	125	88	88	63	83	96	125	159	427	323	404	537	301	277	309	152	363	357
chr7	7010001	7020000	1.35501	2.46475e-13	16	22	11	18	10	23	19	52	41	118	62	111	110	89	59	71	40	99	100
chr7	7940001	7950000	1.06138	0.00477455	3	3	4	3	2	8	7	24	15	18	33	16	30	23	26	16	8	20	19
chr7	10500001	10510000	1.35136	1.42102e-09	23	26	24	6	16	18	24	42	52	107	70	119	151	78	55	83	55	63	133
chr7	16980001	16990000	1.22718	9.99332e-10	10	13	11	15	4	22	13	26	23	46	52	60	87	50	56	62	18	54	57
chr7	24610001	24620000	1.04802	0.0189342	3	10	3	3	0	7	4	16	6	20	12	15	17	21	13	18	12	14	40
chr7	32460001	32470000	1.37427	0.0204834	5	8	2	3	3	7	10	15	11	14	35	25	31	21	17	8	8	17	92
chr7	33940001	33950000	1.0483	0.0297792	4	3	1	5	2	1	14	15	9	12	16	20	30	24	9	12	6	11	40
chr7	38080001	38090000	1.34478	5.91378e-12	21	9	11	9	6	12	20	21	32	47	43	70	83	65	48	55	25	67	50
chr7	49750001	49760000	1.01792	3.00185e-07	8	24	15	16	7	21	29	50	30	69	73	87	103	58	50	58	30	102	55
chr7	52550001	52560000	1.08963	0.000277982	13	3	6	3	2	6	11	21	14	25	26	39	39	21	29	18	13	34	28
chr7	57920001	57930000	1.14933	4.69148e-05	28	36	33	44	29	26	49	81	98	178	93	141	195	101	88	92	74	165	286
chr7	63330001	63340000	1.47287	1.83588e-14	17	12	11	12	12	17	22	25	34	92	51	77	88	67	52	73	42	84	87
chr7	72690001	72700000	1.12815	9.68766e-13	25	26	24	22	10	34	35	55	46	123	109	126	162	96	61	89	53	112	86
chr7	80770001	80780000	1.73993	3.02738e-21	14	13	5	11	10	11	21	44	40	94	63	87	129	80	68	83	41	95	107
chr7	85910001	85920000	1.50598	4.00549e-14	9	14	10	12	7	17	19	25	35	76	70	70	88	57	32	64	35	82	63
chr7	86060001	86070000	1.13435	0.00294561	6	5	3	2	2	2	12	11	7	13	16	18	38	30	9	18	11	22	17
chr7	88850001	88860000	1.31763	1.83624e-10	17	10	11	8	6	13	26	33	36	60	54	72	76	54	55	43	36	62	86
chr7	93730001	93740000	1.16782	9.87569e-10	16	15	14	13	14	11	15	36	28	55	62	71	105	71	51	41	29	81	45
chr7	96620001	96630000	1.29043	0.00104403	6	7	3	4	6	1	7	12	7	20	11	17	38	28	15	15	14	25	48
chr7	112390001	112400000	1.14325	0.000399379	6	8	3	5	3	2	6	20	9	18	19	32	32	18	21	22	13	32	25
chr7	112650001	112660000	1.1166	5.49703e-13	29	33	24	21	25	27	23	48	52	116	76	98	152	88	81	110	56	111	118
chr7	117230001	117240000	1.22405	1.42241e-10	17	22	14	8	13	17	21	41	29	69	83	110	121	67	43	67	32	72	64
chr7	123400001	123410000	1.09646	5.9935e-13	32	30	19	30	17	26	27	49	54	118	95	121	134	78	71	93	64	110	89
chr7	127060001	127070000	1.10615	6.40368e-08	12	9	11	16	15	19	22	45	43	69	51	79	91	61	44	44	36	89	56
chr7	132510001	132520000	1.02562	0.0133506	0	5	5	3	3	3	15	21	6	13	28	19	40	37	18	22	9	19	19
chr7	143200001	143210000	1.6081	6.70727e-17	23	30	15	28	16	28	39	41	75	135	120	164	200	98	64	101	96	147	201
chr7	145050001	145060000	1.17676	1.4694e-17	26	31	19	25	21	27	27	56	52	117	103	110	142	103	79	93	58	118	123
chr7	149890001	149900000	1.45506	1.07245e-17	13	20	24	10	20	14	20	36	50	80	81	111	132	70	72	82	45	97	95
chr7	150060001	150070000	1.01921	3.17215e-14	63	87	69	67	49	57	55	108	119	286	194	248	343	221	172	243	136	246	209
chr8	9700001	9710000	1.3617	4.28196e-11	8	17	13	11	13	16	30	35	48	75	63	85	121	53	52	77	34	111	53
chr8	25900001	25910000	1.46295	0.0194567	4	5	4	7	1	4	6	14	8	19	11	20	15	27	10	22	8	19	91
chr8	43100001	43110000	1.06321	0.0115315	16	21	14	12	11	18	24	41	38	40	33	70	82	44	38	38	39	58	189
chr8	51260001	51270000	1.87193	8.32078e-17	5	15	11	9	8	8	20	36	33	81	83	93	124	57	46	77	39	93	124
chr8	52290001	52300000	1.70865	1.86055e-19	19	24	10	19	12	27	38	46	62	124	128	129	177	107	87	102	65	112	223
chr8	52700001	52710000	1.03721	1.86931e-05	12	19	3	18	7	13	22	50	21	41	53	67	91	56	49	50	24	53	94
chr8	53990001	54000000	1.10121	0.0175878	2	3	2	2	1	9	18	19	18	18	20	31	31	12	11	27	22	22	14
chr8	55370001	55380000	1.05256	0.00670577	2	4	2	7	1	4	14	16	9	18	17	17	25	17	21	19	22	25	428
chr8	60450001	60460000	1.139	4.07597e-13	26	23	16	21	9	31	24	39	43	102	77	93	126	90	64	67	35	86	96
chr8	61680001	61690000	1.00226	0.00101758	9	10	7	12	1	6	11	18	10	24	24	36	45	45	23	25	12	20	48
chr8	62870001	62880000	1.06495	0.00214291	4	7	1	5	4	4	11	13	7	18	16	30	21	19	18	22	12	21	28
chr8	67090001	67100000	1.14553	0.000536276	3	17	5	8	5	8	14	23	10	21	51	30	54	37	28	29	19	29	71
chr8	70760001	70770000	1.00057	6.95059e-08	18	19	15	12	6	18	29	41	38	47	55	82	86	58	46	59	31	73	81
chr8	72380001	72390000	1.019	0.00600888	5	4	4	2	2	5	9	12	12	17	18	19	20	17	19	15	11	12	19
chr8	75380001	75390000	1.08647	0.00230355	5	11	10	4	4	3	11	9	20	17	12	35	34	24	18	38	7	30	24
chr8	77590001	77600000	1.76571	0.040667	4	8	1	2	2	0	7	6	11	12	11	14	12	17	8	13	11	2	88
chr8	84600001	84610000	1.20879	1.55027e-11	13	29	28	27	13	20	32	75	54	107	98	108	161	90	86	104	52	108	158
chr8	86060001	86070000	1.76859	1.08121e-14	12	12	3	11	8	12	20	27	27	54	58	89	94	58	58	66	33	79	129
chr8	88830001	88840000	1.11866	1.42102e-09	20	27	27	17	16	28	35	52	41	105	76	112	115	101	72	96	53	89	152
chr8	89620001	89630000	1.11237	0.000456183	2	8	4	8	3	2	11	18	14	21	17	30	28	29	18	23	9	31	30
chr8	90320001	90330000	1.04675	0.000381863	10	7	5	10	8	3	20	31	17	29	27	48	52	27	27	42	19	46	63
chr8	92820001	92830000	1.23821	5.61788e-13	15	19	28	18	19	23	34	53	50	114	84	124	140	79	78	84	47	120	124
chr8	105230001	105240000	1.4596	0.00430994	3	5	0	4	2	2	12	12	8	13	14	15	23	24	19	15	7	15	67
chr8	111560001	111570000	1.30975	0.000631471	7	2	4	2	2	3	6	13	16	11	21	18	25	21	22	11	10	15	27
chr8	112770001	112780000	1.40161	2.58846e-15	21	23	22	25	10	31	29	56	54	153	98	128	147	101	77	98	50	122	167
chr8	119530001	119540000	1.01968	0.00758205	1	3	3	4	3	4	20	18	9	17	18	18	41	26	22	21	11	20	30
chr8	129830001	129840000	1.39123	2.87997e-10	12	25	10	13	5	17	21	16	28	69	47	87	71	71	51	50	38	55	90
chr8	132490001	132500000	1.22345	3.2809e-17	30	45	17	29	30	40	53	63	80	147	125	158	201	116	108	127	73	169	202
chr8	137540001	137550000	1.36014	1.4803e-11	24	14	14	11	7	11	18	39	24	88	64	72	96	63	66	68	27	73	99
chr8	137800001	137810000	1.05499	2.03368e-11	18	36	19	26	18	29	29	62	64	95	80	110	124	89	72	88	59	104	127
chr8	145000001	145010000	1.02763	4.24204e-06	192	287	202	160	165	205	172	321	385	875	650	815	1008	543	461	542	328	794	1315
chr9	2460001	2470000	1.17521	0.00134409	4	5	3	2	4	3	8	13	11	24	23	15	28	25	17	17	10	15	11
chr9	17070001	17080000	1.11898	4.18715e-13	28	27	19	23	10	24	34	62	32	91	91	131	155	78	83	96	51	120	104
chr9	23820001	23830000	1.38753	0.045615	11	6	5	6	3	5	6	29	22	32	22	18	30	23	12	14	9	22	149
chr9	26490001	26500000	1.00517	4.85984e-11	32	40	34	35	23	48	56	71	87	143	95	148	201	114	93	159	77	180	131
chr9	30290001	30300000	1.49906	3.40432e-11	8	7	11	7	4	9	28	21	29	58	50	58	73	59	31	43	32	67	60
chr9	33600001	33610000	1.12157	4.33089e-09	14	50	6	21	21	23	28	49	41	102	110	92	137	91	55	94	50	89	97
chr9	34740001	34750000	1.2008	3.11785e-14	21	17	17	17	10	18	28	54	40	91	75	95	123	79	75	77	51	90	70
chr9	44860001	44870000	1.00414	2.77964e-09	36	18	14	20	18	34	25	57	54	94	69	111	115	71	71	78	50	110	99
chr9	66080001	66090000	2.13855	1.51001e-12	4	4	4	6	5	6	4	10	20	49	42	56	42	29	44	28	19	29	37
chr9	69730001	69740000	1.02436	0.00587156	6	8	3	10	0	7	8	12	15	10	18	39	34	30	21	25	8	18	11
chr9	75450001	75460000	1.12356	2.08042e-13	22	17	23	25	12	33	39	44	50	91	84	111	141	103	80	66	46	106	114
chr9	78670001	78680000	1.637	8.85015e-15	9	6	10	13	8	10	14	22	28	68	40	71	93	60	37	46	32	73	58
chr9	79630001	79640000	1.00535	0.0026769	6	3	10	3	5	8	10	12	11	17	14	27	32	38	23	18	16	28	255
chr9	82800001	82810000	1.07287	3.82486e-13	18	29	29	27	22	35	35	45	56	120	98	99	144	109	82	88	58	107	110
chr9	87900001	87910000	1.20724	9.76245e-13	44	28	5	22	18	15	38	59	61	109	87	127	147	89	85	84	64	112	112
chr9	92870001	92880000	1.05098	0.00449861	7	2	2	4	1	6	10	12	6	13	15	24	28	22	24	17	9	15	17
chr9	93490001	93500000	1.01933	3.29014e-11	26	60	33	37	20	37	38	65	81	159	124	137	187	128	78	134	54	159	112
chr9	96640001	96650000	1.22699	2.11403e-22	30	37	31	36	30	28	41	72	82	135	145	175	199	155	96	128	79	146	160
chr9	100610001	100620000	1.17656	0.000529385	4	6	1	6	4	7	7	12	10	23	15	24	39	21	10	20	15	30	204
chr9	102830001	102840000	1.05987	1.9929e-13	26	21	21	25	13	36	48	65	54	108	90	118	165	97	79	98	64	124	109
chr9	106240001	106250000	1.40527	2.37977e-09	7	17	9	7	7	9	16	40	29	56	73	66	96	51	40	68	33	58	32
chr9	106960001	106970000	1.02175	1.24316e-10	22	32	18	21	16	16	28	51	40	103	86	95	122	77	62	87	40	88	67
chr9	109620001	109630000	1.08599	0.00786757	4	4	0	5	5	10	14	14	16	20	23	19	19	20	26	13	12	21	49
chr9	109820001	109830000	1.01262	0.00941925	3	3	9	3	0	4	11	9	7	19	15	18	18	21	17	16	5	25	18
chr9	111150001	111160000	1.06443	6.21409e-11	26	28	11	13	8	31	34	38	32	88	70	104	123	84	64	66	39	84	79
chr10	10200001	10210000	1.00744	1.87144e-12	18	34	22	33	22	19	40	68	57	97	106	115	171	103	100	79	41	106	106
chr10	20490001	20500000	1.04304	0.00204147	3	9	1	4	3	3	13	15	11	20	21	20	37	15	17	18	10	26	23
chr10	22760001	22770000	1.13371	5.33694e-05	34	50	38	28	23	43	36	92	76	196	61	165	200	135	115	117	68	156	289
chr10	27190001	27200000	1.39727	2.61255e-20	22	20	26	24	13	31	36	49	63	110	104	115	186	98	94	122	83	118	123
chr10	42540001	42550000	1.03952	0.013921	36	20	3	21	0	28	15	49	30	39	74	66	111	87	86	57	19	71	62
chr10	51730001	51740000	1.16796	0.0021419	6	5	0	5	1	4	10	9	14	8	20	26	23	16	17	16	9	16	20
chr10	53150001	53160000	1.13183	4.04805e-08	21	19	13	10	8	12	15	47	24	51	77	74	72	55	68	57	24	81	71
chr10	83620001	83630000	1.15709	9.61795e-15	28	23	21	25	16	23	35	62	70	89	76	124	164	92	106	93	41	124	106
chr10	97560001	97570000	1.18169	1.85626e-17	27	29	17	22	20	36	36	49	57	108	105	127	157	116	76	126	51	110	96
chr10	102580001	102590000	1.58065	0.00399309	13	4	2	0	1	13	7	13	15	19	24	26	25	30	24	22	16	31	83
chr10	109710001	109720000	1.12602	1.1344e-10	17	29	20	19	13	19	36	65	51	95	95	110	134	83	49	106	40	113	106
chr10	118920001	118930000	1.18157	0.0328542	3	8	4	5	3	9	10	15	8	30	18	15	25	19	14	13	15	23	82
chr10	123140001	123150000	1.16495	8.32078e-17	20	40	14	29	15	29	41	59	54	117	94	128	177	86	97	106	56	125	117
chr10	124900001	124910000	2.49269	0.00422438	1	1	6	5	1	2	4	9	6	31	14	14	19	22	10	8	21	17	179
chr10	135480001	135490000	1.37781	0.00964636	3	8	8	3	8	7	5	9	13	21	41	31	61	14	7	16	9	35	64
chr10	135490001	135500000	2.35483	6.43512e-28	222	378	475	235	259	289	369	540	1286	3839	2841	3772	4212	2905	1735	3121	1531	3604	3566
chr11	180001	190000	1.99117	6.76456e-20	18	41	17	36	17	25	22	40	111	254	87	201	229	139	104	128	99	288	171
chr11	10560001	10570000	1.11373	1.64633e-07	17	9	15	7	4	22	16	29	28	40	58	59	81	67	40	39	23	67	42
chr11	12050001	12060000	1.0453	0.00224236	4	4	6	5	1	4	9	23	10	25	20	36	32	26	19	20	8	26	15
chr11	15700001	15710000	1.03503	7.98372e-07	12	20	7	10	7	15	17	26	20	42	39	63	83	40	32	41	26	58	49
chr11	20690001	20700000	1.12924	0.00441008	5	13	2	3	3	5	13	20	10	30	25	20	23	26	22	19	17	21	61
chr11	20760001	20770000	1.03574	0.0147653	6	7	0	1	5	4	5	16	6	16	17	18	31	17	29	15	12	15	7
chr11	24910001	24920000	1.1884	1.72352e-14	27	25	17	19	11	21	29	70	49	95	94	98	163	114	74	109	38	94	106
chr11	28740001	28750000	1.05713	0.00438673	3	7	1	5	5	1	12	12	10	20	16	16	26	19	16	20	19	16	17
chr11	31830001	31840000	1.80394	0.0222132	3	8	1	12	1	6	2	7	11	19	14	19	24	27	7	6	14	21	127
chr11	41640001	41650000	1.44342	2.02972e-17	17	16	14	14	9	13	32	39	47	92	70	82	149	95	65	87	33	88	73
chr11	41810001	41820000	1.13661	2.48273e-08	22	15	5	16	10	8	21	35	29	50	61	53	83	65	46	42	40	84	46
chr11	63530001	63540000	1.04747	8.88378e-19	84	98	82	69	53	94	94	136	165	382	252	335	408	261	236	299	150	350	296
chr11	71220001	71230000	1.21774	9.85346e-15	23	28	16	19	13	24	36	64	44	128	126	101	159	98	85	86	42	113	96
chr11	72430001	72440000	1.1737	3.02892e-11	28	29	15	36	22	49	26	57	71	131	91	132	163	100	88	99	63	120	180
chr11	78350001	78360000	1.40647	0.000118627	23	24	10	33	14	26	28	57	51	76	82	86	131	89	70	99	56	84	330
chr11	78590001	78600000	1.18529	0.0012975	22	27	31	23	15	23	20	53	44	91	83	97	122	77	58	67	42	88	283
chr11	78780001	78790000	1.06967	6.31385e-08	42	49	28	35	16	36	52	69	43	118	131	138	186	135	83	136	74	138	264
chr11	80910001	80920000	1.37919	1.69771e-09	29	29	19	18	18	26	41	54	52	108	93	136	148	84	80	101	76	120	264
chr11	81450001	81460000	1.29795	2.72122e-07	8	21	14	21	16	13	31	38	42	69	59	97	88	64	53	79	40	76	165
chr11	81690001	81700000	1.12419	1.16061e-10	34	33	16	27	19	23	24	46	39	103	82	94	129	91	66	92	57	115	153
chr11	82680001	82690000	2.43457	5.2016e-12	7	5	3	7	8	2	17	19	26	71	56	78	96	49	53	70	35	65	164
chr11	85820001	85830000	1.04524	1.65253e-07	21	28	14	28	22	28	33	49	48	89	57	90	170	82	60	123	45	81	135
chr11	91950001	91960000	1.05961	0.0492488	7	12	6	11	3	6	15	16	11	15	30	20	32	41	21	18	17	19	102
chr11	93680001	93690000	1.32625	9.90824e-05	10	4	2	17	8	20	11	15	17	45	60	51	23	44	33	40	21	50	76
chr11	97530001	97540000	1.01635	2.36574e-08	20	39	19	16	14	17	27	40	37	82	74	105	96	82	47	56	48	103	85
chr11	105730001	105740000	1.01294	0.00173233	6	7	2	7	5	6	8	15	19	22	19	21	28	32	14	25	11	18	24
chr11	115500001	115510000	1.18195	1.85626e-17	30	33	21	22	20	21	39	66	57	126	110	103	182	111	116	100	55	139	96
chr11	115650001	115660000	1.01734	0.000458643	6	8	9	5	5	7	8	15	13	18	25	25	33	29	23	26	10	37	30
chr11	121130001	121140000	1.02202	0.000457702	5	11	8	4	4	10	6	16	16	32	26	35	31	25	19	25	10	30	23
chr11	124970001	124980000	1.08464	4.89337e-11	26	20	16	19	12	26	39	47	43	110	67	92	119	80	66	96	38	106	93
chr11	128990001	129000000	1.33812	1.23183e-14	20	21	7	16	16	16	20	47	51	83	94	103	100	71	75	68	35	74	94
chr12	17160001	17170000	1.56032	9.37603e-15	19	8	14	10	8	21	21	29	44	89	69	94	98	55	60	65	33	90	109
chr12	19380001	19390000	1.6484	4.33182e-17	13	16	8	16	9	11	20	44	41	75	66	94	131	79	51	79	40	100	131
chr12	21680001	21690000	1.07346	0.021122	5	9	6	5	2	2	9	17	10	13	19	18	26	14	19	19	14	13	66
chr12	22880001	22890000	1.03346	0.00224906	4	6	2	4	2	5	13	20	14	16	23	25	34	23	14	21	15	17	30
chr12	23430001	23440000	1.18095	1.90462e-06	15	15	18	15	6	17	10	27	24	48	72	66	59	46	38	42	33	63	97
chr12	25830001	25840000	1.44654	8.10649e-14	15	14	4	15	4	8	28	25	32	57	49	67	109	68	47	57	32	61	66
chr12	33180001	33190000	1.38959	1.55578e-14	15	25	11	11	5	14	23	33	28	65	75	72	112	57	52	78	40	86	85
chr12	42620001	42630000	1.48757	7.10895e-11	11	9	4	8	9	8	13	17	32	48	32	50	69	40	36	40	29	41	45
chr12	43610001	43620000	1.621	8.83396e-25	18	22	14	13	17	26	29	46	61	136	121	132	151	105	70	105	56	124	127
chr12	45440001	45450000	1.06375	0.00290124	8	3	4	8	7	2	11	20	12	30	21	30	30	20	16	25	22	17	43
chr12	46080001	46090000	1.22777	0.000490752	2	5	3	9	1	9	12	15	9	15	45	25	53	27	20	18	9	34	23
chr12	46410001	46420000	2.03705	3.22638e-30	8	14	17	16	5	14	14	25	52	87	94	100	137	85	65	81	44	117	117
chr12	54360001	54370000	1.23055	0.0417946	7	7	4	7	1	13	14	17	12	21	28	28	22	28	14	23	14	19	119
chr12	54440001	54450000	1.27404	0.0365734	20	23	11	17	4	10	25	29	34	35	51	51	39	41	28	30	37	45	274
chr12	62400001	62410000	1.31176	3.70364e-14	28	27	16	21	19	22	20	39	58	97	99	104	141	65	70	100	51	86	133
chr12	65670001	65680000	1.04675	0.0107243	7	5	2	6	4	7	10	29	17	22	25	19	26	38	23	22	11	14	61
chr12	75050001	75060000	1.5981	1.30295e-15	13	9	11	10	3	9	20	23	28	56	57	65	78	67	46	44	32	75	73
chr12	81370001	81380000	1.13013	0.00361787	6	3	2	4	0	5	9	14	10	12	15	21	30	22	28	11	5	17	23
chr12	92020001	92030000	1.08968	2.31229e-11	21	38	29	29	34	31	53	57	61	131	93	148	170	117	104	116	75	137	174
chr12	106970001	106980000	1.05098	0.0178677	8	17	14	13	10	13	15	35	20	38	27	38	69	50	37	34	23	52	160
chr12	114830001	114840000	1.50082	0.0247364	2	8	10	4	0	4	16	7	15	15	18	24	29	20	18	21	12	31	107
chr12	114850001	114860000	1.036	0.000533943	11	9	3	4	4	8	16	41	21	36	32	30	59	44	24	33	23	31	51
chr12	115110001	115120000	1.17992	3.32398e-12	26	26	19	29	12	21	44	74	54	115	101	141	140	96	74	98	60	121	158
chr13	19240001	19250000	1.00288	3.75408e-08	20	18	10	18	14	19	19	33	20	61	47	74	102	58	50	48	38	75	69
chr13	25130001	25140000	1.12963	4.12879e-13	34	14	21	21	18	25	39	57	56	115	105	98	125	101	99	95	42	118	91
chr13	36980001	36990000	1.03833	0.00417173	5	5	1	5	4	6	5	16	10	16	23	26	23	19	20	26	6	18	12
chr13	37640001	37650000	1.37186	7.49471e-16	23	25	14	21	9	12	24	53	52	96	91	112	157	81	79	87	47	111	56
chr13	53770001	53780000	1.33085	7.53147e-16	23	36	39	26	21	37	31	67	73	154	106	174	210	145	95	115	76	147	204
chr13	53950001	53960000	1.00949	0.00837471	6	1	4	6	5	4	9	10	11	16	19	23	29	9	24	11	13	22	13
chr13	54020001	54030000	1.11679	6.57905e-08	12	15	11	10	14	19	14	34	23	56	46	82	78	48	42	62	24	56	74
chr13	57300001	57310000	2.19707	3.72125e-15	6	2	3	3	2	4	10	19	31	41	36	44	47	43	45	39	31	48	45
chr13	57470001	57480000	1.21643	1.47103e-08	10	12	6	15	1	8	23	32	29	42	58	49	81	44	38	41	25	57	48
chr13	57860001	57870000	1.65099	9.94818e-16	8	14	6	11	4	9	10	28	25	43	55	57	91	55	49	50	28	67	70
chr13	58890001	58900000	1.61333	1.28171e-15	8	15	9	10	3	14	13	29	32	64	54	80	80	47	54	55	37	62	72
chr13	59080001	59090000	1.17782	0.000535785	7	3	4	7	3	4	11	13	14	26	16	23	39	16	28	27	10	35	12
chr13	63870001	63880000	1.13531	2.87759e-09	15	14	12	7	14	10	28	33	29	50	52	70	81	74	41	55	35	69	56
chr13	68680001	68690000	1.30216	7.22614e-09	10	21	3	5	13	8	12	41	21	45	48	62	80	62	49	56	36	65	43
chr13	80170001	80180000	1.13357	5.66931e-11	18	26	16	19	16	23	26	46	35	120	62	84	120	82	78	77	33	95	93
chr13	81060001	81070000	1.39645	7.0827e-18	27	15	14	20	19	22	26	31	48	108	82	104	125	84	75	110	44	94	98
chr13	82730001	82740000	1.46876	1.7174e-15	13	21	12	11	9	19	17	36	42	83	63	97	93	68	45	82	40	88	91
chr13	84090001	84100000	1.2807	1.50279e-11	14	17	8	18	7	12	19	32	34	51	66	64	84	75	36	67	26	84	58
chr13	88720001	88730000	1.01515	0.00449178	9	4	3	9	1	3	7	12	6	12	19	23	33	26	16	19	9	29	13
chr13	88940001	88950000	1.41599	8.18772e-15	14	24	19	16	16	9	27	40	44	112	66	123	129	80	64	69	46	111	86
chr13	92180001	92190000	1.03152	0.00254691	12	4	5	3	0	3	9	16	15	19	19	23	27	18	18	24	13	26	15
chr13	100630001	100640000	1.07794	0.0103471	5	9	3	10	7	10	11	16	11	26	18	25	36	30	24	22	11	20	94
chr13	100640001	100650000	1.0165	0.00479722	4	3	2	5	6	8	3	22	6	18	29	24	32	29	20	16	11	20	156
chr13	105160001	105170000	1.08102	0.00168267	14	7	1	3	5	6	15	13	11	30	26	30	16	27	26	36	11	32	33
chr13	110430001	110440000	2.00997	1.43787e-33	35	32	18	26	14	28	40	73	121	243	164	241	303	126	148	184	113	244	291
chr13	112710001	112720000	1.70179	8.17731e-06	3	3	2	2	3	3	6	10	11	31	15	26	26	25	19	11	15	21	221
chr13	112720001	112730000	1.22247	0.00275187	2	3	5	2	2	7	7	11	16	24	21	23	17	19	9	10	14	17	188
chr14	24940001	24950000	1.16192	5.99716e-13	30	24	9	13	9	25	24	51	41	72	70	88	137	85	73	67	50	106	70
chr14	28310001	28320000	1.16491	1.14767e-11	15	24	20	24	4	21	26	49	42	83	73	100	119	81	69	56	37	84	110
chr14	29230001	29240000	1.36594	3.75348e-06	4	13	5	5	1	4	10	17	16	46	30	36	41	31	22	21	15	33	166
chr14	31010001	31020000	1.14951	2.19294e-17	30	44	15	33	24	26	38	74	72	147	123	160	167	112	104	105	64	127	121
chr14	32590001	32600000	1.08864	4.4325e-15	43	64	37	41	45	38	51	58	87	174	160	204	246	166	116	161	68	171	201
chr14	38060001	38070000	1.0557	0.00245263	7	11	5	3	6	6	9	7	13	31	16	24	22	21	27	12	16	24	29
chr14	41090001	41100000	1.34599	2.53227e-09	16	11	4	5	4	12	15	27	17	46	37	61	67	48	42	38	24	49	67
chr14	42140001	42150000	1.10283	1.92196e-08	29	35	44	39	27	25	30	50	78	155	99	172	182	102	69	108	70	142	136
chr14	45850001	45860000	1.42842	2.2539e-08	5	10	3	6	3	6	15	25	24	39	23	43	63	36	28	38	25	46	36
chr14	46100001	46110000	1.09833	2.67486e-14	36	34	28	27	26	31	34	49	67	114	106	137	182	93	75	107	60	131	141
chr14	48130001	48140000	1.13331	5.28273e-11	22	26	8	22	13	17	17	30	48	69	53	82	99	67	54	69	35	81	56
chr14	48140001	48150000	1.06008	0.0474935	7	8	7	10	5	9	9	15	15	24	30	16	20	24	17	18	10	34	100
chr14	59300001	59310000	1.10636	2.50595e-14	26	32	17	33	17	22	44	73	76	119	93	116	149	106	84	109	54	129	130
chr14	60950001	60960000	1.17727	0.0361218	3	12	1	10	3	6	16	32	13	25	22	27	30	29	36	20	17	28	100
chr14	61430001	61440000	1.55481	3.93623e-14	14	14	5	7	7	8	10	28	26	65	54	63	81	51	45	55	27	49	52
chr14	66180001	66190000	1.27302	9.22108e-17	21	26	21	21	20	32	27	52	65	111	101	104	145	98	64	113	61	129	120
chr14	70030001	70040000	1.32549	2.37065e-09	16	18	7	12	6	17	16	46	33	50	60	88	65	54	66	49	48	87	85
chr14	78480001	78490000	1.29246	1.32674e-15	19	18	9	14	10	16	29	46	40	72	77	86	107	84	78	80	43	75	73
chr14	82090001	82100000	1.469	6.22604e-16	21	20	19	14	16	16	34	42	54	115	91	130	122	80	65	87	55	112	142
chr14	88200001	88210000	1.16144	1.49686e-18	32	32	27	33	18	29	29	59	60	109	125	109	171	110	88	119	57	135	137
chr14	97340001	97350000	1.11229	0.00021465	10	5	6	5	2	7	13	19	12	26	33	21	32	40	35	32	11	35	22
chr14	104640001	104650000	1.32	2.05862e-36	209	326	202	184	131	239	233	353	456	1167	789	1139	1449	887	781	904	504	1105	921
chr14	105350001	105360000	1.10601	1.1908e-17	171	297	227	145	133	253	211	384	424	977	754	904	1084	737	701	736	402	881	804
chr14	105930001	105940000	1.06997	1.11933e-22	192	236	163	155	117	212	183	348	373	808	673	800	1062	671	567	668	339	770	451
chr15	20140001	20150000	1.32824	5.89399e-17	17	22	20	23	8	22	29	39	47	95	79	98	147	84	69	78	34	111	117
chr15	20400001	20410000	2.03926	4.6898e-14	8	16	8	7	5	6	15	26	48	88	33	53	111	56	45	59	41	121	105
chr15	54750001	54760000	1.20961	4.75333e-13	26	20	11	16	9	31	33	35	50	67	70	102	138	87	61	102	39	81	85
chr15	55730001	55740000	1.02486	1.15698e-07	70	34	99	84	49	77	81	143	159	327	255	299	421	243	179	247	153	302	242
chr15	74420001	74430000	1.45636	0.0052695	15	10	14	14	10	19	24	41	42	55	42	62	72	45	51	44	45	49	307
chr15	76630001	76640000	1.84723	0.0120365	2	5	1	7	1	4	5	16	7	9	13	25	22	21	15	9	15	23	121
chr15	96870001	96880000	1.15603	1.94387e-05	8	5	4	8	4	12	15	17	14	43	32	31	50	35	20	25	20	29	41
chr16	600001	610000	1.23457	4.29041e-09	172	294	265	193	163	224	235	377	464	1140	793	984	1359	817	595	779	467	954	1687
chr16	610001	620000	1.13051	5.05776e-21	155	219	120	141	108	188	152	234	326	667	489	655	874	535	425	548	297	579	820
chr16	1820001	1830000	1.01323	3.28702e-15	110	139	98	92	88	118	109	189	216	410	349	438	529	367	294	328	193	383	587
chr16	1840001	1850000	1.13031	8.83396e-25	162	183	165	170	99	179	161	280	315	694	508	745	899	554	505	581	309	714	800
chr16	2160001	2170000	1.51241	3.10069e-19	37	61	57	43	32	54	58	106	139	278	198	280	353	223	186	237	106	275	451
chr16	15010001	15020000	3.67117	2.68025e-21	2	1	2	2	0	3	6	11	26	55	50	57	122	44	44	76	33	55	144
chr16	15230001	15240000	1.22251	7.12819e-10	33	68	61	45	32	39	52	77	83	221	172	229	303	169	129	161	96	186	351
chr16	16410001	16420000	1.04856	0.0189878	3	39	24	27	15	21	21	24	38	131	31	109	75	62	92	57	41	69	83
chr16	18430001	18440000	1.74476	4.13248e-08	23	35	24	26	14	10	30	51	23	178	170	193	222	62	124	187	68	198	119
chr16	18440001	18450000	1.03891	0.00484735	9	9	9	3	2	4	10	21	4	16	29	29	58	40	30	25	11	15	35
chr16	18480001	18490000	1.73049	0.0129264	0	21	47	16	12	22	6	22	14	191	96	164	131	77	91	100	44	122	210
chr16	28420001	28430000	1.26794	0.000426812	10	21	9	10	2	2	4	12	9	58	23	32	39	37	19	29	20	45	46
chr16	32120001	32130000	1.77207	3.78756e-12	13	6	4	7	1	6	17	20	30	48	60	61	63	40	22	44	28	59	61
chr16	32490001	32500000	2.1697	6.55127e-09	2	1	4	3	3	6	9	10	20	35	32	41	65	35	10	28	7	33	63
chr16	32540001	32550000	1.0553	0.00798638	4	3	3	3	3	4	12	17	12	25	20	25	26	31	5	16	12	15	19
chr16	32820001	32830000	1.75391	9.85091e-08	9	26	17	13	14	21	21	23	57	93	95	89	152	95	38	65	47	107	236
chr16	32850001	32860000	1.31632	2.46091e-09	20	24	14	17	13	14	28	40	40	90	103	101	140	83	31	65	35	77	135
chr16	33810001	33820000	1.54012	5.66568e-08	8	7	11	13	4	11	13	23	20	63	45	56	61	45	26	41	25	59	109
chr16	33850001	33860000	1.16997	9.14802e-09	35	55	30	22	18	50	29	88	86	160	126	143	189	124	96	122	63	135	263
chr16	33960001	33970000	1.06158	2.28953e-11	328	548	478	356	282	469	424	617	804	1977	1390	1778	2086	1347	1027	1310	794	1569	2105
chr16	34570001	34580000	1.21592	2.07327e-10	9	22	15	23	9	11	19	24	38	67	60	73	110	63	47	40	29	71	56
chr16	54700001	54710000	1.04174	0.00795805	7	4	2	2	1	3	5	22	9	12	21	25	23	21	18	14	11	15	19
chr16	55360001	55370000	1.22851	0.0225305	6	7	9	6	5	10	10	27	9	49	26	28	35	25	21	28	19	21	119
chr16	56020001	56030000	1.0017	2.02479e-09	33	62	40	42	25	40	49	77	93	215	141	171	193	137	86	138	68	189	121
chr16	86540001	86550000	1.27426	0.000186634	7	7	7	11	7	8	9	24	13	25	27	35	43	35	27	34	22	42	98
chr17	35290001	35300000	1.06614	0.000977518	5	9	13	3	8	2	11	15	16	26	24	31	34	30	24	22	29	28	426
chr17	44330001	44340000	1.63701	3.91431e-12	7	10	12	3	5	10	18	20	24	60	46	56	62	46	37	52	26	88	58
chr17	59470001	59480000	1.17898	1.82717e-09	8	23	10	11	10	15	14	32	33	61	56	62	83	49	49	46	38	56	411
chr17	59530001	59540000	1.01092	0.001049	7	10	8	12	5	8	8	23	17	34	26	34	41	31	33	19	38	30	652
chr17	62870001	62880000	1.08235	3.62306e-06	11	11	15	21	4	10	23	40	29	56	46	61	82	38	53	46	23	71	86
chr18	5190001	5200000	1.26554	0.0320466	7	6	6	6	3	4	8	20	11	19	19	13	27	23	20	14	17	19	103
chr18	10910001	10920000	1.54747	1.31065e-15	9	13	8	7	10	15	26	22	29	56	66	75	114	72	61	56	25	81	51
chr18	11430001	11440000	1.23388	2.65684e-15	37	47	33	23	17	59	32	77	72	194	132	197	226	126	114	148	75	157	166
chr18	14990001	15000000	1.90694	3.96549e-25	13	25	11	13	12	12	11	27	57	106	89	98	107	80	66	86	60	109	104
chr18	37230001	37240000	1.09186	0.0029762	5	3	5	3	3	5	9	8	8	15	16	22	21	23	20	14	13	16	15
chr18	42160001	42170000	1.0339	9.82925e-08	13	21	16	14	3	19	21	24	37	48	46	67	86	51	54	49	23	49	55
chr18	44770001	44780000	1.20674	0.00228151	3	3	4	7	3	4	5	9	6	18	18	25	21	19	9	13	20	20	190
chr18	49390001	49400000	1.50844	1.08121e-14	8	11	15	12	4	18	29	30	38	71	77	79	83	68	51	71	43	99	68
chr18	51870001	51880000	1.14964	0.00147389	6	3	7	9	1	3	5	9	12	18	20	23	35	20	9	17	5	19	26
chr18	55020001	55030000	1.31053	0.0467666	2	4	2	11	2	3	16	20	9	16	18	21	32	33	10	22	13	21	96
chr18	59220001	59230000	1.10587	5.19648e-07	18	22	18	30	14	26	41	55	49	54	117	133	126	68	48	95	60	114	133
chr18	64530001	64540000	1.18152	2.56479e-08	10	20	12	12	7	19	17	29	24	64	45	58	76	66	43	39	26	73	88
chr18	69870001	69880000	1.26229	3.25381e-11	10	16	9	19	6	13	25	29	42	61	59	64	83	56	45	51	26	68	79
chr18	70200001	70210000	1.1417	0.00533808	3	8	1	5	1	3	13	17	15	14	15	17	25	22	20	18	10	19	46
chr19	22040001	22050000	1.06677	5.48355e-10	34	24	17	17	11	13	25	51	46	86	67	79	146	67	83	68	43	83	69
chr19	23100001	23110000	1.20856	5.16862e-06	11	11	4	4	5	10	3	24	20	32	22	38	43	37	30	29	13	42	38
chr20	9240001	9250000	1.02068	0.0062383	6	7	3	6	1	3	7	16	13	11	17	19	38	25	25	14	13	12	16
chr20	19620001	19630000	1.05382	1.67051e-10	24	29	29	23	14	18	39	52	50	100	77	81	164	97	59	92	56	114	109
chr20	20740001	20750000	1.02521	1.1177e-08	20	50	30	15	13	18	40	70	39	119	87	113	151	99	82	103	61	112	109
chr20	21080001	21090000	1.02098	0.00886344	3	16	3	4	2	6	6	17	7	30	22	16	26	31	19	12	22	28	213
chr20	21370001	21380000	1.34673	0.0173314	4	8	7	5	5	6	13	18	11	32	19	21	24	30	20	14	24	30	114
chr20	37350001	37360000	1.02241	3.3313e-05	12	7	7	8	9	11	15	22	18	46	28	35	46	41	38	32	27	44	434
chr20	40620001	40630000	1.05932	5.67874e-11	20	44	25	21	22	35	48	54	62	121	113	129	144	99	77	121	50	114	151
chr20	58510001	58520000	1.39818	6.07017e-22	25	26	25	19	12	29	27	40	67	122	100	121	138	103	84	102	58	126	101
chr20	62190001	62200000	1.01059	1.7377e-12	266	426	294	231	228	330	267	435	590	1268	950	1107	1524	907	767	833	531	1197	1334
chr21	10880001	10890000	1.12111	1.9551e-09	31	14	27	22	12	23	39	49	62	123	89	89	131	83	71	79	51	86	118
chr21	14750001	14760000	1.24833	1.52703e-14	15	30	26	12	16	25	28	34	56	79	90	106	126	79	63	89	44	110	97
chr21	20860001	20870000	1.89915	1.13084e-13	6	18	4	10	7	8	11	28	41	67	50	66	89	62	38	49	43	61	123
chr21	30150001	30160000	1.15295	3.37991e-13	24	43	21	25	25	29	41	49	64	134	99	126	176	97	79	107	42	147	153
chr21	30440001	30450000	1.09316	1.01781e-05	13	11	6	15	8	9	21	32	19	46	58	56	67	32	30	41	22	60	79
chr21	31300001	31310000	1.15934	0.00220511	5	2	8	3	1	1	5	20	9	19	20	17	26	22	17	12	12	23	27
chr21	36390001	36400000	1.05823	0.0477756	12	14	4	6	6	9	15	23	19	19	27	26	28	23	30	20	20	30	123
chr21	37250001	37260000	1.09364	6.901e-13	34	39	29	28	27	55	55	90	73	196	141	157	196	127	124	136	67	170	201
chr22	20710001	20720000	1.22918	1.45887e-05	40	45	27	28	29	25	37	63	50	278	126	144	151	80	88	118	88	181	152
chr1	540001	550000	-1.65619	0.000160158	214	292	151	110	194	156	68	102	54	204	60	59	81	61	78	85	42	118	109
chr1	12960001	12970000	-1.30199	2.324e-05	20	27	15	24	21	14	15	20	9	16	8	15	16	12	10	14	8	28	4
chr1	25650001	25660000	-1.01877	0.00018598	27	57	18	31	15	35	27	25	12	40	12	27	41	23	17	15	11	27	29
chr1	42010001	42020000	-1.17909	2.56509e-05	151	204	173	179	127	174	88	147	56	180	159	143	184	112	108	105	43	130	77
chr1	83760001	83770000	-1.05336	0.000566743	12	17	11	9	9	21	11	15	5	7	12	14	17	12	7	9	8	9	9
chr1	117130001	117140000	-1.09267	0.000870633	16	15	6	8	8	18	9	19	3	9	5	13	14	9	3	11	6	18	8
chr1	120900001	120910000	-1.03919	0.0464428	23	35	13	12	12	14	10	11	9	14	9	21	12	5	5	9	9	13	32
chr1	209940001	209950000	-1.03711	0.00774614	213	266	169	210	141	206	93	122	72	210	92	148	184	125	90	132	73	135	347
chr2	1940001	1950000	-1.02806	6.39657e-08	311	469	287	322	224	307	204	308	132	393	240	284	373	221	216	218	136	281	196
chr2	10150001	10160000	-1.10344	6.51945e-05	755	998	670	766	542	725	378	535	278	851	501	585	796	428	351	514	298	607	584
chr2	87930001	87940000	-1.01741	0.0228571	11	17	19	6	3	21	4	17	3	17	11	9	11	6	7	12	11	9	7
chr2	92060001	92070000	-1.15303	0.000446667	19	27	18	21	16	27	13	16	11	30	14	10	21	10	9	7	10	19	15
chr2	95610001	95620000	-1.00515	2.13256e-12	156	158	139	141	107	134	152	194	49	142	96	134	201	106	83	149	65	155	135
chr2	129690001	129700000	-1.14491	8.57319e-11	143	208	111	159	107	138	121	125	49	142	89	116	125	110	121	95	45	118	119
chr2	132020001	132030000	-1.28796	1.08297e-06	49	77	42	55	37	53	22	48	15	44	31	47	62	25	21	20	28	22	36
chr2	132110001	132120000	-1.14588	3.66811e-10	49	63	27	55	24	46	31	60	14	41	21	38	50	22	33	35	18	35	36
chr2	161590001	161600000	-1.01098	1.79099e-08	57	66	41	50	36	43	36	56	21	51	37	46	57	40	39	40	13	46	30
chr2	229200001	229210000	-1.0327	5.18834e-05	54	68	34	50	31	45	24	31	20	46	40	49	46	33	19	27	18	43	29
chr3	54750001	54760000	-1.21226	4.68486e-11	137	150	94	186	98	128	90	122	44	131	84	95	137	101	80	80	32	104	102
chr3	96340001	96350000	-1.00139	0.000198006	17	28	29	35	13	26	14	33	6	25	14	22	26	18	25	22	8	20	28
chr3	158290001	158300000	-1.03567	1.33896e-09	91	158	109	100	77	105	95	117	46	121	76	85	141	83	74	80	49	86	86
chr3	181830001	181840000	-1.03295	1.19104e-11	73	98	52	84	67	77	68	90	39	60	54	64	99	79	61	64	22	64	51
chr3	195370001	195380000	-1.62788	3.41064e-07	41	84	34	50	65	37	36	36	19	26	16	34	38	25	18	35	18	30	26
chr3	195700001	195710000	-1.33812	2.47263e-06	48	34	22	31	16	25	20	23	5	24	13	19	25	11	15	10	15	25	29
chr3	197360001	197370000	-1.05292	1.65949e-05	47	78	49	83	46	75	68	40	26	31	68	46	89	46	26	52	34	56	59
chr3	197370001	197380000	-1.69397	8.13502e-07	172	317	245	200	165	168	108	106	42	189	90	120	162	88	74	86	60	95	98
chr4	1130001	1140000	-1.26001	9.72702e-07	95	193	91	129	89	95	82	89	33	112	70	74	96	82	52	62	49	85	97
chr4	9210001	9220000	-1.03348	0.000194223	235	214	100	167	206	207	220	203	64	310	135	173	175	131	120	131	103	186	156
chr4	9230001	9240000	-1.52485	0.00155661	116	100	232	313	72	162	66	142	64	79	99	107	178	127	84	77	6	95	119
chr4	9410001	9420000	-1.12801	1.68213e-06	19	31	27	26	22	23	23	36	17	19	13	15	36	13	19	24	12	23	14
chr4	49510001	49520000	-1.06706	0.0104295	1616	2672	3345	2856	1594	974	1337	4613	766	2288	2193	1684	1421	2394	1239	1231	1778	1967	2258
chr4	79920001	79930000	-1.00488	7.39031e-06	33	53	27	46	23	34	24	35	11	43	22	31	42	25	30	28	14	30	25
chr4	179870001	179880000	-1.11038	2.56014e-05	152	183	138	149	113	154	84	119	68	167	93	106	183	103	68	112	43	119	117
chr4	183880001	183890000	-1.30134	1.76844e-06	131	146	102	170	91	110	57	96	39	123	72	83	99	72	72	78	32	92	83
chr4	184770001	184780000	-1.2001	9.05296e-15	198	265	183	228	195	236	260	231	113	205	165	173	243	159	129	155	89	198	115
chr4	187880001	187890000	-1.17326	0.00045376	142	170	128	215	51	151	183	252	74	202	120	132	86	95	83	44	77	71	162
chr4	190410001	190420000	-1.25061	1.32342e-05	241	448	240	314	199	352	103	227	117	224	178	197	281	189	144	167	80	210	266
chr4	190760001	190770000	-1.17108	3.56238e-11	290	282	338	272	163	230	443	291	129	207	182	263	277	207	181	175	119	242	305
chr4	191040001	191050000	-1.49356	0.000147906	55	133	65	42	49	46	49	35	9	73	27	33	58	37	21	37	14	49	44
chr5	260001	270000	-1.12514	0.000109284	232	256	244	241	176	214	144	150	107	232	134	212	248	120	111	152	75	187	219
chr5	1040001	1050000	-1.15179	2.69141e-07	1216	1316	892	1155	675	1222	588	779	385	981	717	930	1051	760	643	750	358	819	730
chr5	2140001	2150000	-1.17428	1.75551e-11	450	561	459	488	470	459	451	424	233	424	348	441	530	357	285	367	194	380	296
chr5	7300001	7310000	-1.3123	4.41438e-05	69	138	109	80	56	81	53	82	32	97	34	60	82	47	37	52	40	48	77
chr5	10540001	10550000	-1.05187	7.21722e-08	223	320	175	212	127	210	117	183	84	201	145	154	225	158	110	132	92	176	211
chr6	3140001	3150000	-1.10673	0.000277707	186	570	272	271	331	381	241	292	119	218	166	305	456	176	210	233	147	363	385
chr6	29090001	29100000	-1.25273	0.018858	36	21	26	36	32	33	25	67	15	20	20	12	66	20	33	31	15	0	21
chr6	58330001	58340000	-1.07072	0.000242361	25	21	13	24	20	9	12	19	8	16	13	13	24	17	10	9	8	21	12
chr6	149190001	149200000	-1.06044	3.01108e-09	166	214	142	154	107	179	136	170	56	209	114	132	184	103	93	113	75	163	113
chr6	168990001	169000000	-1.15813	7.96483e-07	270	390	259	278	310	380	279	271	150	298	257	265	287	210	148	186	147	246	283
chr6	170800001	170810000	-1.37811	4.5903e-13	191	233	180	83	147	234	200	168	69	123	114	124	159	145	105	100	57	156	106
chr6	171020001	171030000	-1.12701	0.0215451	51	57	10	52	21	37	12	14	15	25	16	15	18	38	28	23	15	37	21
chr7	20001	30000	-1.13075	0.000171648	10	9	16	13	22	18	27	39	8	9	22	10	25	17	14	16	5	15	11
chr7	69960001	69970000	-1.13625	3.32398e-12	167	251	164	250	162	202	165	209	74	213	143	178	224	138	125	151	79	150	137
chr7	76160001	76170000	-1.27146	0.034814	19	77	50	121	28	57	11	98	13	84	21	29	47	22	18	70	11	77	31
chr7	76580001	76590000	-1.00363	0.00334859	14	35	11	14	11	8	16	17	7	5	13	23	18	9	14	10	9	20	7
chr7	76640001	76650000	-1.32302	0.0342129	40	76	36	12	27	44	21	15	12	17	48	66	28	8	17	19	10	6	23
chr7	148020001	148030000	-1.22559	3.20901e-08	384	523	303	342	253	365	228	271	122	354	237	262	336	218	215	228	119	278	241
chr7	150600001	150610000	-1.01537	1.0128e-09	138	236	150	147	158	161	139	184	77	152	123	159	220	130	126	135	84	142	117
chr7	152520001	152530000	-1.06207	0.000171707	21	33	18	14	13	23	10	24	11	18	15	15	17	12	7	17	6	21	22
chr7	153820001	153830000	-1.03377	0.00294305	20	22	20	31	10	23	12	12	9	20	21	9	18	13	15	14	15	17	9
chr7	154450001	154460000	-1.1049	2.77079e-05	141	194	138	117	109	150	71	128	59	149	92	109	160	77	74	115	49	122	117
chr7	157940001	157950000	-1.86641	1.0069e-09	614	2091	1372	727	893	1350	942	892	299	771	398	437	1016	486	298	567	337	437	625
chr7	158120001	158130000	-1.12078	0.000426322	243	383	345	409	464	403	256	250	175	357	231	327	492	364	225	249	125	375	221
chr7	158130001	158140000	-1.03837	0.000327859	215	221	260	272	260	261	179	173	127	251	156	191	341	247	167	174	101	245	172
chr8	40001	50000	-1.55278	0.00572885	207	344	101	70	257	211	42	98	73	223	69	61	56	102	88	72	59	119	110
chr8	250001	260000	-1.08539	3.60921e-10	86	101	73	90	78	101	108	116	57	93	70	66	108	52	69	77	39	96	44
chr8	1290001	1300000	-1.02175	1.46364e-05	233	415	315	300	231	310	194	320	147	303	253	290	375	244	219	226	142	246	144
chr8	82750001	82760000	-1.46911	4.17866e-05	234	137	85	174	75	215	241	196	68	65	186	49	58	58	89	92	46	116	173
chr8	119920001	119930000	-1.01366	4.91567e-06	41	45	34	48	40	28	38	41	14	41	21	38	40	32	25	42	18	35	42
chr8	140760001	140770000	-1.23965	1.86251e-06	354	561	390	418	318	442	245	329	146	397	249	279	373	216	207	268	138	300	422
chr8	144150001	144160000	-1.27145	0.00190643	447	804	811	446	474	339	198	561	166	532	260	382	561	322	308	287	154	354	793
chr9	320001	330000	-1.03484	2.04995e-06	48	116	82	62	96	72	89	106	57	59	65	74	107	74	56	62	43	59	73
chr9	38980001	38990000	-1.10467	0.00427905	13	11	9	11	14	15	6	13	6	14	8	12	6	6	9	7	4	18	4
chr9	39060001	39070000	-1.11634	0.0141989	28	11	25	29	24	20	18	16	6	25	27	21	14	17	5	15	14	20	20
chr9	39150001	39160000	-1.13898	6.57621e-05	18	32	14	18	12	22	14	16	3	20	11	17	17	12	16	14	7	19	9
chr9	68290001	68300000	-1.06171	1.07771e-06	40	58	37	61	33	48	31	54	22	52	40	29	50	30	25	22	25	36	45
chr9	91670001	91680000	-1.12135	6.89141e-11	406	414	303	382	282	349	244	328	144	358	239	292	360	240	227	239	116	355	287
chr9	91860001	91870000	-1.05024	8.9544e-09	259	369	180	285	155	241	163	177	100	198	168	204	278	210	159	211	99	207	156
chr9	126730001	126740000	-1.24047	1.74071e-08	457	579	344	493	304	444	281	319	158	415	274	345	444	247	225	291	147	307	269
chr9	138720001	138730000	-1.19706	4.79249e-08	511	647	463	612	408	578	364	394	201	513	336	390	544	367	279	350	194	434	411
chr9	141120001	141130000	-1.26201	2.87465e-15	156	136	82	100	96	148	167	141	56	76	120	73	142	74	85	105	46	88	67
chr10	1740001	1750000	-1.01454	1.11219e-07	165	278	187	187	164	184	134	183	106	179	158	174	234	147	153	167	76	156	116
chr10	3490001	3500000	-1.11244	3.62358e-06	179	232	165	240	140	221	139	176	78	189	154	142	155	92	123	155	85	165	199
chr10	38770001	38780000	-1.15813	6.30201e-17	859	1223	928	802	787	1034	1075	1137	411	842	660	866	906	692	688	605	440	872	833
chr10	57270001	57280000	-1.02454	6.58229e-06	49	44	40	60	31	41	33	55	11	28	38	48	46	36	26	50	11	34	61
chr10	81130001	81140000	-1.04793	1.51519e-10	386	433	297	408	230	362	224	323	151	334	247	280	413	271	231	265	143	329	245
chr10	81420001	81430000	-1.31444	1.60315e-05	19	30	15	21	16	10	14	17	10	20	13	15	12	7	8	12	5	12	10
chr10	86360001	86370000	-1.37396	1.35056e-09	254	404	255	291	190	276	171	229	85	257	153	158	262	163	123	165	87	208	173
chr10	88900001	88910000	-1.14387	2.81088e-05	17	27	15	13	5	11	14	33	9	15	8	16	19	10	13	13	5	13	6
chr11	3290001	3300000	-1.0817	0.00130849	21	21	9	14	16	18	9	19	7	12	21	20	17	7	5	9	13	10	8
chr11	4330001	4340000	-1.00849	0.00780564	39	47	31	42	25	42	26	47	18	35	30	29	69	33	1	30	16	34	41
chr11	41160001	41170000	-1.11781	0.00031751	7	28	16	24	14	43	31	34	7	13	27	16	26	9	19	25	14	13	23
chr11	126730001	126740000	-1.02065	1.12483e-08	251	275	180	247	166	193	144	217	76	223	153	188	288	196	146	189	87	226	118
chr12	620001	630000	-1.20482	9.60671e-15	385	537	319	434	250	320	295	381	132	338	247	276	339	229	202	271	150	321	309
chr12	8470001	8480000	-1.14072	3.31839e-07	36	48	31	33	29	49	29	39	11	28	30	38	37	16	25	17	15	39	40
chr12	31230001	31240000	-1.01374	0.00238891	26	29	13	17	17	27	14	11	9	17	19	24	24	5	13	13	7	17	24
chr12	132810001	132820000	-1.52475	0.000105762	643	1608	522	921	645	678	680	325	246	830	302	563	1137	450	251	260	220	281	441
chr13	19470001	19480000	-1.08383	1.80817e-09	87	138	86	77	88	93	102	85	44	92	75	70	104	80	60	68	39	87	85
chr13	52850001	52860000	-1.32506	0.000154347	12	17	14	23	3	11	22	16	2	9	13	15	17	1	10	8	3	11	14
chr14	19620001	19630000	-1.16094	0.0172814	27	51	21	8	15	14	7	16	6	11	12	12	15	18	12	11	13	26	21
chr14	19980001	19990000	-1.15289	0.00714371	10	26	7	20	11	15	3	11	4	15	12	5	17	13	5	11	4	15	3
chr14	34670001	34680000	-1.09014	4.83804e-08	75	90	97	94	83	91	103	73	41	69	72	85	108	58	72	56	45	78	78
chr14	106180001	106190000	-1.59327	3.0217e-05	34	51	59	44	42	32	56	54	9	44	17	11	29	22	27	13	19	55	35
chr15	20730001	20740000	-1.16108	0.000963255	15	20	22	11	16	30	32	32	11	13	8	12	38	8	8	23	2	30	27
chr15	23100001	23110000	-1.07483	5.95021e-05	126	206	111	180	71	173	128	203	81	193	107	109	195	130	70	100	58	131	42
chr15	23400001	23410000	-1.04764	0.00997101	30	39	13	32	37	38	33	38	6	35	14	20	25	19	20	24	35	37	31
chr15	23570001	23580000	-1.69692	3.48115e-06	31	61	23	29	26	47	27	41	4	38	11	15	28	11	16	20	3	17	35
chr15	23680001	23690000	-1.12128	1.12726e-06	398	556	365	478	275	452	229	390	150	468	273	332	407	264	242	297	150	330	364
chr15	26000001	26010000	-1.24598	2.67135e-07	130	208	88	105	170	165	220	226	95	127	128	106	159	108	53	147	54	128	87
chr15	28990001	29000000	-1.17313	0.000299323	25	30	22	20	26	22	12	34	8	18	19	18	15	18	2	21	15	21	30
chr15	29080001	29090000	-1.26892	5.27091e-05	61	85	44	55	60	61	33	68	27	66	40	48	58	31	12	29	22	51	52
chr15	30570001	30580000	-1.17838	0.00358702	17	22	9	12	7	22	8	10	6	16	17	5	5	14	6	11	3	13	6
chr15	30610001	30620000	-2.16287	1.48884e-07	106	144	149	94	85	102	73	63	20	80	38	30	34	21	32	23	17	49	89
chr15	32690001	32700000	-1.21396	0.00155866	28	15	6	46	12	8	20	19	7	17	16	13	19	22	7	19	7	12	5
chr15	91810001	91820000	-1.0246	0.000100574	140	114	150	156	86	126	86	114	59	147	115	98	133	100	93	115	47	116	78
chr15	102290001	102300000	-1.23372	2.11858e-05	462	1106	504	639	497	699	391	637	224	473	407	567	573	374	157	587	322	546	429
chr15	102520001	102530000	-1.17798	0.00372624	68	26	36	82	62	48	40	43	23	38	43	31	99	28	17	25	32	54	37
chr16	14850001	14860000	-1.17315	0.000822691	81	33	32	48	47	56	24	49	26	36	22	55	49	24	17	30	19	41	53
chr16	15320001	15330000	-1.16043	0.000400758	17	44	27	20	6	32	16	31	7	22	11	15	17	16	10	18	9	23	37
chr16	21360001	21370000	-1.09434	0.00499935	44	78	49	53	47	40	41	42	16	55	27	39	45	30	17	39	21	41	96
chr16	31970001	31980000	-1.29771	5.86231e-10	23	45	27	30	21	21	32	33	11	22	15	17	25	24	16	18	10	22	24
chr16	32210001	32220000	-1.29712	0.00934405	17	39	13	12	18	29	11	16	12	16	13	17	20	13	3	17	0	10	23
chr16	58120001	58130000	-1.00887	1.10077e-08	394	529	337	437	325	429	265	366	174	426	321	381	493	356	305	321	134	363	263
chr16	70220001	70230000	-1.20963	3.61398e-05	20	16	11	8	9	19	13	21	5	7	9	11	19	12	2	10	5	17	12
chr16	88150001	88160000	-1.06147	1.55433e-09	223	310	212	210	176	234	168	241	100	255	185	177	277	157	143	191	83	227	133
chr16	88300001	88310000	-1.15981	3.96308e-08	48	75	44	52	51	61	46	40	15	36	34	51	59	45	38	32	25	54	38
chr16	90180001	90190000	-1.04023	4.01656e-05	63	54	44	35	62	74	112	60	30	36	83	60	89	47	54	52	19	34	51
chr17	250001	260000	-1.0698	1.67051e-10	143	181	139	153	157	143	132	180	77	130	127	133	189	113	87	141	73	151	101
chr17	480001	490000	-1.22651	2.26959e-09	841	1280	823	910	646	903	625	771	316	902	588	676	888	574	598	567	285	706	574
chr17	18580001	18590000	-1.05344	0.0412958	19	27	15	18	21	25	24	16	18	20	0	14	27	15	10	21	7	33	14
chr17	20230001	20240000	-1.04895	1.56364e-05	22	36	20	16	13	16	18	26	9	12	15	19	22	15	13	13	10	23	22
chr18	14640001	14650000	-1.43525	9.6342e-07	28	22	19	14	14	17	14	19	5	13	16	18	11	10	4	15	7	8	12
chr19	16040001	16050000	-1.48796	3.71697e-06	101	216	148	98	145	73	101	90	41	81	70	115	120	57	60	62	43	111	78
chr19	43460001	43470000	-1.39958	1.75792e-05	15	23	19	26	16	28	10	18	5	6	8	17	29	15	12	6	8	22	8
chr19	43480001	43490000	-1.00754	0.00012294	39	38	26	28	16	29	30	29	16	21	12	35	39	31	27	14	17	34	9
chr19	43620001	43630000	-1.22448	0.0205601	18	20	33	26	14	18	14	4	7	23	13	12	19	15	9	16	10	23	6
chr19	56740001	56750000	-1.01837	7.12577e-10	258	278	250	241	175	233	220	228	117	266	200	212	270	190	150	187	93	221	207
chr20	18180001	18190000	-1.10432	1.94629e-07	73	89	58	97	54	56	41	68	21	77	43	57	90	54	40	57	23	59	49
chr20	26050001	26060000	-1.52593	1.06741e-08	19	34	30	28	24	22	23	21	7	18	13	26	25	14	9	11	6	19	13
chr20	29450001	29460000	-1.0597	7.44514e-06	29	50	50	46	32	40	28	58	19	50	26	34	41	39	37	33	15	41	18
chr21	9420001	9430000	-1.06095	0.000481101	20	27	20	17	16	40	19	20	7	31	13	23	33	21	17	11	4	24	12
chr21	10570001	10580000	-1.34801	0.0166369	8	16	12	29	7	16	7	15	4	10	4	6	15	9	18	0	8	7	13
chr22	22650001	22660000	-1.00117	1.18889e-09	154	191	164	156	85	160	124	152	62	148	134	149	208	111	109	114	60	123	124
chr22	37000001	37010000	-1.03681	2.39087e-09	228	263	200	251	140	238	137	222	82	222	176	189	268	174	174	157	84	208	123

## Sheet: Table S6
Table S6. Oligos used in this study.
Adapter-1-A	/5Phos/TAGGCATGAGATCGGAAGAGCACACGTCTGAACTCCAGTCAC
Adapter-2-A	/5Phos/GCTACGCTAGATCGGAAGAGCACACGTCTGAACTCCAGTCAC
Adapter-3-A	/5Phos/TCCTGAGCAGATCGGAAGAGCACACGTCTGAACTCCAGTCAC
Adapter-4-A	/5Phos/AGGCAGAAAGATCGGAAGAGCACACGTCTGAACTCCAGTCAC
Adapter-5-A	/5Phos/GAAGAGCGAGATCGGAAGAGCACACGTCTGAACTCCAGTCAC
Adapter-6-A	/5Phos/AACGCATAAGATCGGAAGAGCACACGTCTGAACTCCAGTCAC
Adapter-7-A	/5Phos/ATCGGTCCAGATCGGAAGAGCACACGTCTGAACTCCAGTCAC
Adapter-8-A	/5Phos/GAACCTGGAGATCGGAAGAGCACACGTCTGAACTCCAGTCAC
Adapter-1-B	ACACTCTTTCCCTACACGACGCTCTTCCGATCTCATGCCTA*T
Adapter-2-B	ACACTCTTTCCCTACACGACGCTCTTCCGATCTAGCGTAGC*T
Adapter-3-B	ACACTCTTTCCCTACACGACGCTCTTCCGATCTGCTCAGGA*T
Adapter-4-B	ACACTCTTTCCCTACACGACGCTCTTCCGATCTTTCTGCCT*T
Adapter-5-B	ACACTCTTTCCCTACACGACGCTCTTCCGATCTCGCTCTTC*T
Adapter-6-B	ACACTCTTTCCCTACACGACGCTCTTCCGATCTTATGCGTT*T
Adapter-7-B	ACACTCTTTCCCTACACGACGCTCTTCCGATCTGGACCGAT*T
Adapter-8-B	ACACTCTTTCCCTACACGACGCTCTTCCGATCTCCAGGTTC*T
P5-01	AATGATACGGCGACCACCGAGATCTACACCTCTCTATACACTCTTTCCCTACACGA*C
P5-02	AATGATACGGCGACCACCGAGATCTACACTATCCTCTACACTCTTTCCCTACACGA*C
P5-03	AATGATACGGCGACCACCGAGATCTACACGTAAGGAGACACTCTTTCCCTACACGA*C
P5-04	AATGATACGGCGACCACCGAGATCTACACACTGCATAACACTCTTTCCCTACACGA*C
P5-05	AATGATACGGCGACCACCGAGATCTACACAAGGAGTAACACTCTTTCCCTACACGA*C
P5-06	AATGATACGGCGACCACCGAGATCTACACCTAAGCCTACACTCTTTCCCTACACGA*C
P5-07	AATGATACGGCGACCACCGAGATCTACACTCTCTCCGACACTCTTTCCCTACACGA*C
P5-08	AATGATACGGCGACCACCGAGATCTACACGCGTAAGAACACTCTTTCCCTACACGA*C
P7-01	CAAGCAGAAGACGGCATACGAGATTCGCCTTAGTGACTGGAGTTCAGACGTG*T
P7-02	CAAGCAGAAGACGGCATACGAGATCTAGTACGGTGACTGGAGTTCAGACGTG*T
P7-03	CAAGCAGAAGACGGCATACGAGATTTCTGCCTGTGACTGGAGTTCAGACGTG*T
P7-04	CAAGCAGAAGACGGCATACGAGATGCTCAGGAGTGACTGGAGTTCAGACGTG*T
P7-05	CAAGCAGAAGACGGCATACGAGATAGGAGTCCGTGACTGGAGTTCAGACGTG*T
P7-06	CAAGCAGAAGACGGCATACGAGATCATGCCTAGTGACTGGAGTTCAGACGTG*T
P7-07	CAAGCAGAAGACGGCATACGAGATGTAGAGAGGTGACTGGAGTTCAGACGTG*T
P7-08	CAAGCAGAAGACGGCATACGAGATCAGCCTCGGTGACTGGAGTTCAGACGTG*T
/5Phos/ = 5′ Phosphate modification, * = Phosphorothioate. The red-highlighted sequence is the molecular barcode for each adapter.
